# Supplementary material for: Safety of Handover: A Global Online Survey of Clinical Practitioners and Leaders Regarding Patient Safety during Transitions of Care
Source: Preprints.org preprint supplement (doi:10.20944/preprints202205.0202.v1), 2022-05-16
Supplement: Supplementary file 1 [file Handover Survey Results - REDACTED - FINAL .xlsx]

## Sheet: Handover Survey Results ALL
LANGUAGE	Role	Level	Area-Hospial-Medical	Area-Hospital-Medical	Area-Hospial-Surgical	Area-GP	Area-Community	Area-Mental-Health	Area-PrefNoAnswer	Area-Other	Country	Sector-Government	Sector-Independent	Sector-CharityNGO	Sector-PrefNoAnswer	Sector-Other	Min-years	P2P-Involved	P2P-Well-Performed	P2P-Improve-Time	P2P-Improve-Space	P2P-Improve-ElectronicInfosys	P2P-Improve-Comms	P2P-Improve-LeaderTraining	P2P-Improve-MemberTraining	P2P-Improve-DontKnow	P2P-Improve-NoAnswer	P2P-Improve-Other	P2P-Systems-EPR	P2P-Systems-OtherElectro	P2P-Systems-AuthMsgApp	P2P-Systems-Electroboard	P2P-Systems-MessApps	P2P-Systems-Office	P2P-Systems-PaperNotes	P2P-Systems-Whiteboard	P2P-Systems-F2F	P2P-Systems-Email	P2P-Systems-Telephone	P2P-Systems-Tape	P2P-Systems-None	P2P-Presence	P2P-ErrorFreq	P2P-Harm	P2P-Risk	Referrals-Involved	Referrals-Well-Performed	Referrals-Improve-Time	Referrals-Improve-Space
ENGLISH	Administrator or manager	Senior manager or leader (e.g. CEO, COO)	TRUE	FALSE	FALSE	FALSE	FALSE	FALSE	FALSE		Australia	TRUE	FALSE	FALSE	FALSE	FALSE	15	FALSE																												FALSE
ENGLISH	Paramedic or ambulance worker	Middle grade clinician, middle manager or ward level leader	FALSE	TRUE	FALSE	FALSE	FALSE	FALSE	FALSE		United Kingdom	TRUE	FALSE	FALSE	FALSE	FALSE	5	TRUE	4	FALSE	FALSE	TRUE	TRUE	TRUE	TRUE	FALSE	FALSE	FALSE	TRUE	FALSE	FALSE	FALSE	FALSE	FALSE	FALSE	FALSE	TRUE	FALSE	FALSE	FALSE	FALSE	Sometimes - it varies	I don't know	I don't know the outcome	Moderate risk	FALSE
ENGLISH	Doctor	Senior level medical or nursing or other clinical leader	TRUE	TRUE	FALSE	FALSE	FALSE	FALSE	FALSE		United Kingdom	TRUE	FALSE	FALSE	FALSE	FALSE	15	FALSE																												TRUE	4	TRUE	FALSE
ENGLISH	Doctor	Senior level medical or nursing or other clinical leader	FALSE	FALSE	TRUE	FALSE	FALSE	FALSE	FALSE		United Kingdom	TRUE	TRUE	FALSE	FALSE	FALSE	15	TRUE	4	TRUE	FALSE	TRUE	TRUE	FALSE	FALSE	FALSE	FALSE	FALSE	TRUE	FALSE	FALSE	TRUE	FALSE	FALSE	TRUE	FALSE	TRUE	FALSE	FALSE	FALSE	FALSE	No - always in a separate place	Sometimes (more than once a month)	Low harm - little harm was caused to the patients	Moderate risk	TRUE	2	FALSE	FALSE
ENGLISH	Doctor	Senior level medical or nursing or other clinical leader	FALSE	FALSE	TRUE	FALSE	FALSE	FALSE	FALSE		United Kingdom	TRUE	TRUE	FALSE	FALSE	FALSE	15	FALSE																												TRUE	4	FALSE	FALSE
ENGLISH	Doctor	Senior manager or leader (e.g. CEO, COO)	FALSE	FALSE	TRUE	FALSE	FALSE	FALSE	FALSE		Ghana	TRUE	TRUE	FALSE	FALSE	FALSE	15	TRUE	3	TRUE	TRUE	TRUE	TRUE	TRUE	TRUE	FALSE	FALSE	FALSE	TRUE	FALSE	FALSE	FALSE	FALSE	FALSE	TRUE	FALSE	FALSE	TRUE	FALSE	FALSE	FALSE	Sometimes - it varies	Occasionally (more than once a year)	Moderate harm - the patients were harmed, but not severely	Moderate risk	TRUE	3	FALSE	FALSE
ENGLISH	Doctor	Senior level medical or nursing or other clinical leader	FALSE	FALSE	TRUE	FALSE	FALSE	FALSE	FALSE		United Kingdom	TRUE	FALSE	FALSE	FALSE	FALSE	15	TRUE	4	FALSE	FALSE	FALSE	FALSE	FALSE	FALSE	TRUE	FALSE	FALSE	TRUE	FALSE	FALSE	FALSE	TRUE	TRUE	FALSE	FALSE	FALSE	FALSE	TRUE	FALSE	FALSE	No - always in a separate place	Rarely (less than once a year)	I don't know the outcome	No risk at all	TRUE	5	FALSE	FALSE
ENGLISH	Doctor	Senior level medical or nursing or other clinical leader	FALSE	FALSE	TRUE	FALSE	FALSE	FALSE	FALSE		United Kingdom	FALSE	TRUE	FALSE	FALSE	FALSE	15	TRUE	4	FALSE	TRUE	FALSE	FALSE	FALSE	FALSE	FALSE	FALSE	FALSE	FALSE	FALSE	FALSE	FALSE	FALSE	FALSE	FALSE	FALSE	TRUE	FALSE	FALSE	FALSE	FALSE	Sometimes - it varies	I don't know	No patient safety incidents have occurred in my experience	Low risk	TRUE	5	FALSE	FALSE
ENGLISH	Doctor	Retired consultant	FALSE	TRUE	FALSE	FALSE	FALSE	FALSE	FALSE		United Kingdom	TRUE	FALSE	FALSE	FALSE	FALSE	15	TRUE	4	FALSE	TRUE	TRUE	FALSE	FALSE	TRUE	FALSE	FALSE	FALSE	FALSE	FALSE	FALSE	FALSE	FALSE	TRUE	TRUE	TRUE	TRUE	FALSE	FALSE	FALSE	FALSE	No - always in a separate place	Sometimes (more than once a month)	Moderate harm - the patients were harmed, but not severely	Moderate risk	TRUE	3	TRUE	FALSE
ENGLISH	Doctor	Senior level medical or nursing or other clinical leader	TRUE	FALSE	FALSE	FALSE	FALSE	FALSE	FALSE		United Kingdom	TRUE	FALSE	FALSE	FALSE	FALSE	15	TRUE	4	FALSE	FALSE	TRUE	FALSE	FALSE	FALSE	FALSE	FALSE	FALSE	FALSE	FALSE	TRUE	FALSE	TRUE	TRUE	FALSE	FALSE	TRUE	FALSE	FALSE	FALSE	FALSE	No - always in a separate place	Sometimes (more than once a month)	No harm came to the patients	Low risk	TRUE	4	TRUE	FALSE
ENGLISH	Doctor	Senior level medical or nursing or other clinical leader	TRUE	FALSE	FALSE	FALSE	FALSE	FALSE	FALSE		United Kingdom	TRUE	TRUE	FALSE	FALSE	FALSE	15	TRUE	2	TRUE	FALSE	TRUE	TRUE	FALSE	FALSE	FALSE	FALSE	FALSE	FALSE	FALSE	FALSE	FALSE	FALSE	FALSE	FALSE	FALSE	TRUE	FALSE	FALSE	FALSE	FALSE	Both - in a separate space initially, then afterwards with them	Sometimes (more than once a month)	Moderate harm - the patients were harmed, but not severely	Very high risk	TRUE	2	FALSE	FALSE
ENGLISH	Doctor	Junior clinician, junior manager or junior ward staff	TRUE	FALSE	TRUE	TRUE	FALSE	FALSE	FALSE		United Kingdom	TRUE	FALSE	FALSE	FALSE	FALSE	1	TRUE	4	FALSE	FALSE	TRUE	TRUE	FALSE	FALSE	FALSE	FALSE	FALSE	TRUE	FALSE	FALSE	FALSE	FALSE	FALSE	TRUE	FALSE	TRUE	FALSE	FALSE	FALSE	FALSE	No - always in a separate place	I don't know	I don't know the outcome	Moderate risk	TRUE	4	FALSE	FALSE
ENGLISH	Administrator or manager	Associate support	FALSE	FALSE	FALSE	FALSE	FALSE	FALSE	FALSE	Across health and social care services	United Kingdom	TRUE	FALSE	FALSE	FALSE	FALSE	15	FALSE																												FALSE
ENGLISH	Prefer not to answer	Prefer not to answer	FALSE	FALSE	FALSE	FALSE	FALSE	FALSE	TRUE			FALSE	FALSE	FALSE	FALSE	TRUE	0	FALSE																												FALSE
ENGLISH	Doctor	Senior level medical or nursing or other clinical leader	FALSE	TRUE	FALSE	FALSE	FALSE	FALSE	FALSE		Australia	TRUE	TRUE	FALSE	FALSE	FALSE	10	TRUE	3	TRUE	FALSE	FALSE	FALSE	TRUE	TRUE	FALSE	FALSE	FALSE	FALSE	FALSE	FALSE	FALSE	FALSE	FALSE	FALSE	FALSE	TRUE	FALSE	FALSE	FALSE	FALSE	Sometimes - it varies	Sometimes (more than once a month)	Moderate harm - the patients were harmed, but not severely	Low risk	TRUE	4	TRUE	FALSE
ENGLISH	Doctor	Senior level medical or nursing or other clinical leader	TRUE	FALSE	TRUE	FALSE	FALSE	FALSE	FALSE		United Kingdom	TRUE	TRUE	FALSE	FALSE	FALSE	15	TRUE	5	TRUE	FALSE	FALSE	FALSE	FALSE	FALSE	FALSE	FALSE	FALSE	TRUE	FALSE	TRUE	FALSE	TRUE	FALSE	FALSE	FALSE	FALSE	FALSE	FALSE	FALSE	FALSE	Both - in a separate space initially, then afterwards with them	Never (I have not experience this)	Low harm - little harm was caused to the patients	Low risk	TRUE	5	TRUE	FALSE
ENGLISH	Doctor	Senior level medical or nursing or other clinical leader	TRUE	FALSE	FALSE	FALSE	FALSE	FALSE	FALSE		Poland	TRUE	TRUE	FALSE	FALSE	FALSE	10	TRUE	1	FALSE	TRUE	FALSE	FALSE	FALSE	FALSE	FALSE	FALSE	FALSE	FALSE	FALSE	TRUE	FALSE	FALSE	FALSE	FALSE	FALSE	FALSE	FALSE	FALSE	FALSE	FALSE	No - always in a separate place	Sometimes (more than once a month)	Low harm - little harm was caused to the patients	Moderate risk	FALSE
ENGLISH	Doctor	Senior manager or leader (e.g. CEO, COO)	FALSE	FALSE	TRUE	FALSE	FALSE	FALSE	FALSE		United Kingdom	TRUE	TRUE	FALSE	FALSE	FALSE	15	TRUE	4	TRUE	FALSE	FALSE	TRUE	FALSE	TRUE	FALSE	FALSE	FALSE	TRUE	FALSE	FALSE	FALSE	FALSE	FALSE	FALSE	FALSE	TRUE	FALSE	FALSE	FALSE	FALSE	Both - in a separate space initially, then afterwards with them	Rarely (less than once a year)	No harm came to the patients	Low risk	FALSE
ENGLISH	Doctor	Senior level medical or nursing or other clinical leader	FALSE	FALSE	FALSE	TRUE	FALSE	FALSE	FALSE		United States of America	FALSE	TRUE	FALSE	FALSE	FALSE	15	TRUE	3	TRUE	FALSE	FALSE	TRUE	TRUE	TRUE	FALSE	FALSE	FALSE	TRUE	FALSE	FALSE	FALSE	FALSE	FALSE	FALSE	FALSE	FALSE	FALSE	TRUE	FALSE	FALSE	No - always in a separate place	Often (more than once a week)	Moderate harm - the patients were harmed, but not severely	Very high risk	TRUE	3	TRUE	FALSE
ENGLISH	Doctor	Middle grade clinician, middle manager or ward level leader	FALSE	FALSE	TRUE	FALSE	FALSE	FALSE	FALSE		United States of America	TRUE	TRUE	FALSE	FALSE	FALSE	10	TRUE	4	FALSE	TRUE	TRUE	TRUE	FALSE	FALSE	FALSE	FALSE	FALSE	TRUE	FALSE	TRUE	FALSE	TRUE	FALSE	TRUE	FALSE	TRUE	FALSE	TRUE	FALSE	FALSE	No - always in a separate place	Sometimes (more than once a month)	Moderate harm - the patients were harmed, but not severely	Moderate risk	TRUE	5	FALSE	FALSE
ENGLISH	Doctor	Junior clinician, junior manager or junior ward staff	TRUE	TRUE	TRUE	FALSE	FALSE	FALSE	FALSE		United States of America	FALSE	TRUE	FALSE	FALSE	FALSE	5	TRUE	2	TRUE	TRUE	FALSE	FALSE	TRUE	FALSE	FALSE	FALSE	FALSE	TRUE	FALSE	FALSE	FALSE	FALSE	FALSE	FALSE	FALSE	FALSE	FALSE	FALSE	FALSE	FALSE	No - always in a separate place	Sometimes (more than once a month)	Low harm - little harm was caused to the patients	Very high risk	FALSE
ENGLISH	Doctor	Senior level medical or nursing or other clinical leader	FALSE	TRUE	FALSE	FALSE	FALSE	FALSE	FALSE			TRUE	FALSE	FALSE	FALSE	FALSE	15	TRUE	4	FALSE	FALSE	FALSE	FALSE	TRUE	TRUE	FALSE	FALSE	FALSE	TRUE	FALSE	FALSE	FALSE	FALSE	FALSE	FALSE	FALSE	TRUE	FALSE	FALSE	FALSE	FALSE	Sometimes - it varies	Rarely (less than once a year)	No harm came to the patients	Low risk	TRUE	3	FALSE	FALSE
ENGLISH	Doctor	Senior manager or leader (e.g. CEO, COO)	FALSE	FALSE	TRUE	FALSE	FALSE	FALSE	FALSE		United States of America	FALSE	TRUE	TRUE	FALSE	FALSE	15	TRUE	3	TRUE	TRUE	TRUE	TRUE	TRUE	TRUE	FALSE	FALSE	FALSE	TRUE	TRUE	FALSE	FALSE	FALSE	TRUE	TRUE	FALSE	TRUE	FALSE	FALSE	FALSE	FALSE	No - always in a separate place	Often (more than once a week)	Moderate harm - the patients were harmed, but not severely	Very high risk	TRUE	3	TRUE	FALSE
ENGLISH	Doctor	Senior level medical or nursing or other clinical leader	FALSE	TRUE	TRUE	FALSE	FALSE	FALSE	FALSE		Canada	TRUE	FALSE	FALSE	FALSE	FALSE	10	TRUE	3	TRUE	TRUE	FALSE	TRUE	FALSE	FALSE	FALSE	FALSE	FALSE	FALSE	FALSE	FALSE	FALSE	TRUE	FALSE	FALSE	FALSE	TRUE	TRUE	FALSE	FALSE	FALSE	No - always in a separate place	Sometimes (more than once a month)	Severe harm - they have caused Serious Incidents	High risk	TRUE	3	TRUE	FALSE
ENGLISH	Doctor	Senior level medical or nursing or other clinical leader	FALSE	TRUE	TRUE	FALSE	FALSE	FALSE	FALSE		United States of America	TRUE	TRUE	FALSE	FALSE	FALSE	15	TRUE	4	TRUE	FALSE	FALSE	FALSE	TRUE	FALSE	FALSE	FALSE	FALSE	TRUE	FALSE	FALSE	FALSE	FALSE	FALSE	FALSE	FALSE	TRUE	TRUE	TRUE	FALSE	FALSE	No - always in a separate place	Sometimes (more than once a month)	Moderate harm - the patients were harmed, but not severely	High risk	TRUE	4	TRUE	FALSE
ENGLISH	Doctor	Senior manager or leader (e.g. CEO, COO)	FALSE	TRUE	FALSE	FALSE	FALSE	FALSE	FALSE		United States of America	TRUE	TRUE	FALSE	FALSE	FALSE	10	FALSE																												TRUE	3	TRUE	FALSE
ENGLISH	Administrator or manager	Senior level medical or nursing or other clinical leader	TRUE	FALSE	FALSE	FALSE	FALSE	FALSE	FALSE		United Arab Emirates	FALSE	TRUE	FALSE	FALSE	FALSE	10	TRUE	4	TRUE	FALSE	TRUE	FALSE	FALSE	TRUE	FALSE	FALSE	FALSE	TRUE	FALSE	FALSE	FALSE	FALSE	FALSE	FALSE	FALSE	TRUE	FALSE	FALSE	FALSE	FALSE	Sometimes - it varies	Occasionally (more than once a year)	Moderate harm - the patients were harmed, but not severely	High risk	FALSE
ENGLISH	Administrator or manager	Senior manager or leader (e.g. CEO, COO)	FALSE	FALSE	FALSE	FALSE	FALSE	FALSE	FALSE	hospital management	China	FALSE	TRUE	FALSE	FALSE	FALSE	15	FALSE																												FALSE
ENGLISH	Doctor	Senior level medical or nursing or other clinical leader	FALSE	FALSE	TRUE	FALSE	FALSE	FALSE	FALSE		Canada	TRUE	FALSE	FALSE	FALSE	FALSE	15	TRUE	4	TRUE	FALSE	TRUE	TRUE	FALSE	FALSE	FALSE	FALSE	FALSE	FALSE	FALSE	TRUE	FALSE	FALSE	TRUE	TRUE	FALSE	TRUE	FALSE	FALSE	FALSE	FALSE	No - always in a separate place	Never (I have not experience this)	No patient safety incidents have occurred in my experience	Low risk	TRUE	4	TRUE	FALSE
ENGLISH	Doctor	Senior level medical or nursing or other clinical leader	TRUE	FALSE	FALSE	FALSE	FALSE	FALSE	FALSE		China	FALSE	TRUE	FALSE	FALSE	FALSE	15	FALSE																												TRUE	4	FALSE	FALSE
ENGLISH	Nurse	Senior manager or leader (e.g. CEO, COO)	FALSE	FALSE	TRUE	FALSE	FALSE	FALSE	FALSE		United Kingdom	FALSE	FALSE	TRUE	FALSE	FALSE	15	FALSE																												FALSE
ENGLISH	Doctor	Junior clinician, junior manager or junior ward staff	TRUE	FALSE	FALSE	FALSE	FALSE	FALSE	FALSE		United Kingdom	TRUE	FALSE	FALSE	FALSE	FALSE	1	TRUE	4	TRUE	FALSE	FALSE	FALSE	FALSE	FALSE	FALSE	FALSE	FALSE	TRUE	FALSE	FALSE	FALSE	FALSE	FALSE	TRUE	FALSE	TRUE	FALSE	FALSE	FALSE	FALSE	Sometimes - it varies	Rarely (less than once a year)	Low harm - little harm was caused to the patients	Low risk	TRUE	3	TRUE	FALSE
ENGLISH	Doctor	Middle grade clinician, middle manager or ward level leader	FALSE	TRUE	FALSE	FALSE	FALSE	FALSE	FALSE		United Kingdom	TRUE	FALSE	FALSE	FALSE	FALSE	10	TRUE	3	TRUE	TRUE	TRUE	TRUE	FALSE	FALSE	FALSE	FALSE	FALSE	TRUE	FALSE	FALSE	TRUE	FALSE	FALSE	FALSE	FALSE	FALSE	FALSE	FALSE	FALSE	FALSE	No - always in a separate place	I don't know	Low harm - little harm was caused to the patients	High risk	TRUE	4	FALSE	FALSE
ENGLISH	Doctor	Senior level medical or nursing or other clinical leader	TRUE	FALSE	FALSE	FALSE	FALSE	FALSE	FALSE		United Kingdom	TRUE	FALSE	FALSE	FALSE	FALSE	15	TRUE	4	TRUE	FALSE	FALSE	FALSE	FALSE	FALSE	FALSE	FALSE	FALSE	TRUE	FALSE	FALSE	FALSE	FALSE	TRUE	FALSE	TRUE	TRUE	TRUE	FALSE	FALSE	FALSE	No - always in a separate place	Never (I have not experience this)	No patient safety incidents have occurred in my experience	Low risk	TRUE	5	TRUE	FALSE
ENGLISH	Doctor	Middle grade clinician, middle manager or ward level leader	FALSE	TRUE	FALSE	TRUE	FALSE	FALSE	FALSE		United Kingdom	TRUE	FALSE	FALSE	FALSE	FALSE	15	TRUE	1	TRUE	TRUE	TRUE	TRUE	FALSE	FALSE	FALSE	FALSE	FALSE	TRUE	FALSE	FALSE	FALSE	FALSE	FALSE	FALSE	TRUE	TRUE	FALSE	FALSE	FALSE	FALSE	No - always in a separate place	Very often (every day)	Moderate harm - the patients were harmed, but not severely	Very high risk	TRUE	1	TRUE	TRUE
ENGLISH	Doctor	Senior level medical or nursing or other clinical leader	TRUE	FALSE	FALSE	FALSE	FALSE	FALSE	FALSE			TRUE	FALSE	FALSE	FALSE	FALSE	15	TRUE	4										TRUE	FALSE	FALSE	FALSE	TRUE	FALSE	FALSE	FALSE	TRUE	TRUE	TRUE	FALSE	FALSE	No - always in a separate place	I don't know	I don't know the outcome	Moderate risk	TRUE	4	FALSE	TRUE
ENGLISH	Doctor	Middle grade clinician, middle manager or ward level leader	FALSE	FALSE	FALSE	TRUE	FALSE	FALSE	FALSE		China	TRUE	TRUE	TRUE	FALSE	FALSE	10	TRUE	4	FALSE	FALSE	TRUE	FALSE	FALSE	FALSE	FALSE	FALSE	FALSE	TRUE	FALSE	FALSE	FALSE	FALSE	FALSE	FALSE	FALSE	TRUE	TRUE	TRUE	FALSE	FALSE	Sometimes - it varies	Occasionally (more than once a year)	Low harm - little harm was caused to the patients	Low risk	TRUE	3	TRUE	FALSE
ENGLISH	Doctor	Middle grade clinician, middle manager or ward level leader	TRUE	TRUE	FALSE	FALSE	FALSE	FALSE	FALSE		China	FALSE	TRUE	FALSE	FALSE	FALSE	15	TRUE	3	TRUE	FALSE	TRUE	TRUE	TRUE	TRUE	FALSE	FALSE	FALSE	TRUE	FALSE	FALSE	FALSE	FALSE	FALSE	FALSE	FALSE	TRUE	TRUE	TRUE	FALSE	FALSE	Sometimes - it varies	Often (more than once a week)	Low harm - little harm was caused to the patients	Moderate risk	TRUE	4	FALSE	FALSE
ENGLISH	Doctor	Senior manager or leader (e.g. CEO, COO)	TRUE	FALSE	FALSE	FALSE	FALSE	FALSE	FALSE		China	FALSE	TRUE	FALSE	FALSE	FALSE	15	TRUE	5	FALSE	FALSE	TRUE	FALSE	FALSE	FALSE	FALSE	FALSE	FALSE	TRUE	FALSE	FALSE	TRUE	FALSE	FALSE	TRUE	FALSE	TRUE	FALSE	FALSE	FALSE	FALSE	Sometimes - it varies	Sometimes (more than once a month)	Low harm - little harm was caused to the patients	Moderate risk	TRUE	4	FALSE	TRUE
ENGLISH	Doctor	Middle grade clinician, middle manager or ward level leader	TRUE	FALSE	FALSE	FALSE	FALSE	FALSE	FALSE			FALSE	TRUE	FALSE	FALSE	FALSE	10	FALSE																												TRUE	5	FALSE	TRUE
ENGLISH	Doctor	Middle grade clinician, middle manager or ward level leader	FALSE	FALSE	FALSE	TRUE	FALSE	FALSE	FALSE		China	FALSE	TRUE	FALSE	FALSE	FALSE	15	TRUE	4	FALSE	FALSE	TRUE	TRUE	FALSE	FALSE	FALSE	FALSE	FALSE	TRUE	FALSE	FALSE	FALSE	FALSE	FALSE	TRUE	FALSE	TRUE	FALSE	FALSE	FALSE	FALSE	Both - in a separate space initially, then afterwards with them	Never (I have not experience this)	No patient safety incidents have occurred in my experience	Low risk	TRUE	4	FALSE	FALSE
ENGLISH	Doctor	Senior level medical or nursing or other clinical leader	FALSE	TRUE	FALSE	FALSE	FALSE	FALSE	FALSE		China	FALSE	TRUE	FALSE	FALSE	FALSE	15	TRUE	4	TRUE	TRUE	TRUE	TRUE	TRUE	TRUE	FALSE	FALSE	FALSE	TRUE	FALSE	FALSE	FALSE	TRUE	FALSE	FALSE	FALSE	TRUE	FALSE	TRUE	FALSE	FALSE	Sometimes - it varies	Occasionally (more than once a year)	Severe harm - they have caused Serious Incidents	Moderate risk	TRUE	3	TRUE	TRUE
ENGLISH	Doctor	Prefer not to answer	TRUE	FALSE	FALSE	FALSE	FALSE	FALSE	TRUE		United Kingdom	TRUE	FALSE	FALSE	FALSE	FALSE	10	TRUE	4	TRUE	TRUE	FALSE	FALSE	FALSE	FALSE	FALSE	FALSE	FALSE	FALSE	FALSE	FALSE	FALSE	FALSE	FALSE	TRUE	FALSE	TRUE	FALSE	TRUE	FALSE	FALSE	No - always in a separate place	Rarely (less than once a year)	I don't know the outcome	Low risk	TRUE	4	TRUE	TRUE
ENGLISH	Doctor	Middle grade clinician, middle manager or ward level leader	FALSE	FALSE	FALSE	FALSE	FALSE	FALSE	FALSE	medical imaging	China	TRUE	TRUE	FALSE	FALSE	FALSE	15	TRUE	4	TRUE	FALSE	FALSE	FALSE	FALSE	TRUE	FALSE	FALSE	FALSE	TRUE	FALSE	TRUE	FALSE	FALSE	TRUE	FALSE	FALSE	TRUE	TRUE	TRUE	FALSE	FALSE	Yes - always with them	Occasionally (more than once a year)	No patient safety incidents have occurred in my experience	Low risk	TRUE	4	TRUE	FALSE
ENGLISH	Doctor	Middle grade clinician, middle manager or ward level leader	FALSE	TRUE	FALSE	FALSE	FALSE	FALSE	FALSE			FALSE	TRUE	FALSE	FALSE	FALSE	10	TRUE	4	TRUE	TRUE	FALSE	FALSE	FALSE	FALSE	FALSE	FALSE	FALSE	TRUE	FALSE	FALSE	FALSE	TRUE	FALSE	TRUE	FALSE	TRUE	TRUE	TRUE	FALSE	FALSE	No - always in a separate place	Rarely (less than once a year)	No harm came to the patients	Low risk	TRUE	5	TRUE	TRUE
ENGLISH	Doctor	Family Physician in a Collaborative Practice	FALSE	TRUE	FALSE	TRUE	FALSE	FALSE	FALSE		Canada	TRUE	FALSE	FALSE	FALSE	FALSE	15	TRUE	5										TRUE	FALSE	FALSE	FALSE	TRUE	FALSE	FALSE	FALSE	TRUE	FALSE	FALSE	FALSE	FALSE	No - always in a separate place	Rarely (less than once a year)	No patient safety incidents have occurred in my experience	Low risk	TRUE	5
ENGLISH	Doctor	Senior level medical or nursing or other clinical leader	TRUE	FALSE	FALSE	FALSE	FALSE	FALSE	FALSE		United Kingdom	TRUE	FALSE	FALSE	FALSE	FALSE	10	TRUE	2	TRUE	TRUE	TRUE	FALSE	FALSE	TRUE	FALSE	FALSE	FALSE	TRUE	FALSE	FALSE	FALSE	FALSE	FALSE	FALSE	FALSE	TRUE	FALSE	FALSE	FALSE	FALSE	No - always in a separate place	Often (more than once a week)	Severe harm - they have caused Serious Incidents	High risk	TRUE	5	FALSE	FALSE
ENGLISH	Doctor	Middle grade clinician, middle manager or ward level leader	FALSE	FALSE	TRUE	FALSE	FALSE	FALSE	FALSE		United States of America	FALSE	TRUE	FALSE	FALSE	FALSE	5	TRUE	3	TRUE	TRUE	FALSE	FALSE	FALSE	FALSE	FALSE	FALSE	FALSE	FALSE	FALSE	FALSE	FALSE	FALSE	FALSE	FALSE	FALSE	TRUE	FALSE	TRUE	FALSE	FALSE	No - always in a separate place	Sometimes (more than once a month)	Moderate harm - the patients were harmed, but not severely	High risk	TRUE	4	FALSE	FALSE
ENGLISH	Administrator or manager	Senior level medical or nursing or other clinical leader	TRUE	FALSE	FALSE	FALSE	FALSE	FALSE	FALSE		United Kingdom	FALSE	TRUE	FALSE	FALSE	FALSE	15	TRUE	5	FALSE	FALSE	TRUE	FALSE	FALSE	FALSE	FALSE	FALSE	FALSE	FALSE	FALSE	FALSE	FALSE	FALSE	FALSE	FALSE	FALSE	FALSE	TRUE	FALSE	FALSE	FALSE	Sometimes - it varies	Never (I have not experience this)	No harm came to the patients	No risk at all	TRUE	4	FALSE	FALSE
ENGLISH	Doctor	Senior manager or leader (e.g. CEO, COO)	TRUE	FALSE	FALSE	FALSE	FALSE	FALSE	FALSE		Australia	TRUE	FALSE	FALSE	FALSE	FALSE	15	FALSE																												FALSE
ENGLISH	Doctor	Senior level medical or nursing or other clinical leader	TRUE	TRUE	TRUE	FALSE	FALSE	FALSE	FALSE		Canada	TRUE	FALSE	FALSE	FALSE	FALSE	15	TRUE	4	FALSE	TRUE	TRUE	FALSE	FALSE	FALSE	FALSE	FALSE	FALSE	TRUE	FALSE	FALSE	FALSE	TRUE	FALSE	FALSE	FALSE	TRUE	TRUE	TRUE	FALSE	FALSE	No - always in a separate place	Occasionally (more than once a year)	Low harm - little harm was caused to the patients	Low risk	TRUE	4	FALSE	FALSE
ENGLISH	Doctor	Middle grade clinician, middle manager or ward level leader	FALSE	TRUE	FALSE	FALSE	FALSE	FALSE	FALSE		United Kingdom	TRUE	FALSE	FALSE	FALSE	FALSE	15	TRUE	4	TRUE	TRUE	FALSE	FALSE	FALSE	TRUE	FALSE	FALSE	FALSE	TRUE	FALSE	FALSE	FALSE	FALSE	FALSE	TRUE	FALSE	TRUE	FALSE	FALSE	FALSE	FALSE	No - always in a separate place	Sometimes (more than once a month)	I don't know the outcome	Moderate risk	TRUE	4	FALSE	FALSE
ENGLISH	Doctor	Senior level medical or nursing or other clinical leader	TRUE	FALSE	FALSE	FALSE	FALSE	FALSE	FALSE		China	FALSE	TRUE	FALSE	FALSE	FALSE	15	TRUE	3	FALSE	TRUE	TRUE	TRUE	FALSE	TRUE	FALSE	FALSE	FALSE	TRUE	FALSE	FALSE	FALSE	FALSE	FALSE	TRUE	FALSE	TRUE	TRUE	TRUE	FALSE	FALSE	Sometimes - it varies	Occasionally (more than once a year)	Moderate harm - the patients were harmed, but not severely	Moderate risk	TRUE	4	FALSE	FALSE
ENGLISH	Other allied health professional	Senior level medical or nursing or other clinical leader	TRUE	FALSE	TRUE	TRUE	FALSE	FALSE	FALSE		United Kingdom	FALSE	TRUE	FALSE	FALSE	FALSE	15	FALSE																												FALSE
ENGLISH	Doctor	Senior level medical or nursing or other clinical leader	FALSE	TRUE	FALSE	FALSE	FALSE	FALSE	FALSE		United States of America	FALSE	TRUE	FALSE	FALSE	FALSE	15	TRUE	3	TRUE	TRUE	FALSE	FALSE	FALSE	FALSE	FALSE	FALSE	FALSE	TRUE	FALSE	FALSE	FALSE	FALSE	FALSE	FALSE	FALSE	TRUE	FALSE	FALSE	FALSE	FALSE	No - always in a separate place	Rarely (less than once a year)	Low harm - little harm was caused to the patients	Moderate risk	TRUE	3	FALSE	FALSE
ENGLISH	Doctor	Senior level medical or nursing or other clinical leader	TRUE	FALSE	TRUE	FALSE	FALSE	FALSE	FALSE		United Kingdom	TRUE	FALSE	FALSE	FALSE	FALSE	15	TRUE	3	TRUE	FALSE	FALSE	TRUE	FALSE	FALSE	FALSE	FALSE	FALSE	FALSE	FALSE	FALSE	TRUE	FALSE	TRUE	TRUE	TRUE	TRUE	FALSE	TRUE	FALSE	FALSE	No - always in a separate place	Occasionally (more than once a year)	Severe harm - they have caused Serious Incidents	Moderate risk	TRUE	2	FALSE	FALSE
ENGLISH	Doctor	Senior level medical or nursing or other clinical leader	TRUE	FALSE	FALSE	FALSE	FALSE	FALSE	FALSE		United Kingdom	TRUE	FALSE	FALSE	FALSE	FALSE	15	TRUE	5	FALSE	TRUE	FALSE	FALSE	FALSE	FALSE	FALSE	FALSE	FALSE	TRUE	FALSE	FALSE	FALSE	TRUE	FALSE	FALSE	FALSE	TRUE	FALSE	FALSE	FALSE	FALSE	No - always in a separate place	Rarely (less than once a year)	Moderate harm - the patients were harmed, but not severely	Low risk	TRUE	4	FALSE	TRUE
ENGLISH	Doctor	Senior level medical or nursing or other clinical leader	FALSE	TRUE	FALSE	FALSE	FALSE	FALSE	FALSE		New Zealand	TRUE	FALSE	FALSE	FALSE	FALSE	10	TRUE	4	TRUE	FALSE	TRUE	FALSE	FALSE	TRUE	FALSE	FALSE	FALSE	TRUE	FALSE	FALSE	FALSE	FALSE	FALSE	FALSE	FALSE	TRUE	FALSE	FALSE	FALSE	FALSE	No - always in a separate place	Rarely (less than once a year)	Low harm - little harm was caused to the patients	Low risk	TRUE	3	TRUE	FALSE
ENGLISH	Nurse	Senior level medical or nursing or other clinical leader	FALSE	FALSE	TRUE	FALSE	FALSE	FALSE	FALSE		United Kingdom	FALSE	TRUE	FALSE	FALSE	FALSE	15	FALSE																												FALSE
ENGLISH	Doctor	Middle grade clinician, middle manager or ward level leader	FALSE	FALSE	TRUE	FALSE	FALSE	FALSE	FALSE		China	FALSE	TRUE	FALSE	FALSE	FALSE	15	TRUE	3	TRUE	FALSE	TRUE	TRUE	FALSE	TRUE	FALSE	FALSE	FALSE	TRUE	FALSE	FALSE	FALSE	TRUE	FALSE	FALSE	FALSE	FALSE	FALSE	FALSE	FALSE	FALSE	No - always in a separate place	Occasionally (more than once a year)	Low harm - little harm was caused to the patients	Moderate risk	TRUE	3	TRUE	FALSE
ENGLISH	Administrator or manager	Senior level medical or nursing or other clinical leader	TRUE	FALSE	FALSE	FALSE	FALSE	FALSE	FALSE		United States of America	FALSE	FALSE	FALSE	TRUE	FALSE	5	TRUE	3	TRUE	FALSE	FALSE	FALSE	FALSE	FALSE	FALSE	FALSE	FALSE	TRUE	FALSE	FALSE	FALSE	FALSE	FALSE	TRUE	FALSE	TRUE	TRUE	TRUE	FALSE	FALSE	Yes - always with them	Sometimes (more than once a month)	Moderate harm - the patients were harmed, but not severely	High risk	TRUE	4	FALSE	FALSE
ENGLISH	Doctor	Senior level medical or nursing or other clinical leader	FALSE	TRUE	FALSE	FALSE	FALSE	FALSE	FALSE		China	FALSE	TRUE	FALSE	FALSE	FALSE	15	TRUE	3	FALSE	FALSE	FALSE	TRUE	TRUE	TRUE	FALSE	FALSE	FALSE	TRUE	FALSE	FALSE	FALSE	FALSE	FALSE	FALSE	FALSE	TRUE	FALSE	FALSE	FALSE	FALSE	No - always in a separate place	Occasionally (more than once a year)	Moderate harm - the patients were harmed, but not severely	Low risk	TRUE	2	FALSE	FALSE
ENGLISH	Doctor	Prefer not to answer	TRUE	FALSE	FALSE	FALSE	FALSE	FALSE	FALSE		China	FALSE	TRUE	FALSE	FALSE	FALSE	5	TRUE	5	TRUE	FALSE	TRUE	TRUE	FALSE	TRUE	FALSE	FALSE	FALSE	TRUE	FALSE	FALSE	FALSE	FALSE	FALSE	TRUE	TRUE	TRUE	FALSE	TRUE	FALSE	FALSE	Yes - always with them	Rarely (less than once a year)	Low harm - little harm was caused to the patients	No risk at all	TRUE	5	TRUE	TRUE
ENGLISH	Doctor	Middle grade clinician, middle manager or ward level leader	FALSE	FALSE	FALSE	TRUE	FALSE	FALSE	FALSE			FALSE	TRUE	FALSE	FALSE	FALSE	10	FALSE																												TRUE	5	FALSE	TRUE
ENGLISH	Nurse	Middle grade clinician, middle manager or ward level leader	FALSE	TRUE	FALSE	FALSE	FALSE	FALSE	FALSE		United Kingdom	TRUE	FALSE	FALSE	FALSE	FALSE	15	TRUE	3	FALSE	TRUE	TRUE	FALSE	TRUE	TRUE	FALSE	FALSE	FALSE	TRUE	FALSE	FALSE	TRUE	TRUE	FALSE	FALSE	FALSE	TRUE	FALSE	FALSE	FALSE	FALSE	No - always in a separate place	Sometimes (more than once a month)	Low harm - little harm was caused to the patients	Moderate risk	TRUE	3	FALSE	FALSE
ENGLISH	Administrator or manager	Senior level medical or nursing or other clinical leader	FALSE	FALSE	TRUE	FALSE	FALSE	FALSE	FALSE		United Kingdom	TRUE	TRUE	FALSE	FALSE	FALSE	15	FALSE																												FALSE
ENGLISH	Doctor	Senior level medical or nursing or other clinical leader	FALSE	FALSE	TRUE	FALSE	FALSE	FALSE	FALSE		Canada	TRUE	FALSE	FALSE	FALSE	FALSE	15	TRUE	4	FALSE	TRUE	FALSE	FALSE	FALSE	FALSE	FALSE	FALSE	FALSE	FALSE	FALSE	FALSE	FALSE	TRUE	FALSE	FALSE	FALSE	TRUE	TRUE	TRUE	FALSE	FALSE	No - always in a separate place	Rarely (less than once a year)	Moderate harm - the patients were harmed, but not severely	Moderate risk	TRUE	4	FALSE	FALSE
ENGLISH	Nurse	Middle grade clinician, middle manager or ward level leader	TRUE	FALSE	FALSE	FALSE	FALSE	FALSE	FALSE			FALSE	TRUE	FALSE	FALSE	FALSE	15	FALSE																												FALSE
ENGLISH	Nurse	Senior level medical or nursing or other clinical leader	FALSE	FALSE	TRUE	FALSE	FALSE	FALSE	FALSE			FALSE	TRUE	FALSE	FALSE	FALSE	15	TRUE	5	FALSE	TRUE	FALSE	FALSE	FALSE	FALSE	FALSE	FALSE	FALSE	FALSE	FALSE	FALSE	FALSE	FALSE	TRUE	FALSE	TRUE	TRUE	FALSE	TRUE	FALSE	FALSE	Prefer not to answer	Rarely (less than once a year)	No patient safety incidents have occurred in my experience	High risk	TRUE	5	TRUE	TRUE
ENGLISH	Doctor	Junior clinician, junior manager or junior ward staff	FALSE	FALSE	FALSE	TRUE	FALSE	FALSE	FALSE		China	FALSE	TRUE	FALSE	FALSE	FALSE	1	TRUE	4	FALSE	FALSE	FALSE	TRUE	TRUE	TRUE	FALSE	FALSE	FALSE	TRUE	FALSE	FALSE	FALSE	TRUE	TRUE	TRUE	FALSE	TRUE	TRUE	TRUE	FALSE	FALSE	No - always in a separate place	Occasionally (more than once a year)	Low harm - little harm was caused to the patients	Moderate risk	TRUE	3	FALSE	FALSE
ENGLISH	Administrator or manager	Senior level medical or nursing or other clinical leader	TRUE	FALSE	FALSE	FALSE	FALSE	FALSE	FALSE			FALSE	TRUE	FALSE	FALSE	FALSE	15	FALSE																												TRUE	5	TRUE	FALSE
ENGLISH	Doctor	Middle grade clinician, middle manager or ward level leader	TRUE	FALSE	FALSE	FALSE	FALSE	FALSE	FALSE			TRUE	FALSE	FALSE	FALSE	FALSE	15	FALSE																												TRUE	5	FALSE	TRUE
ENGLISH	Nurse	Prefer not to answer	FALSE	FALSE	FALSE	FALSE	FALSE	FALSE	TRUE		China	FALSE	TRUE	FALSE	FALSE	FALSE	5	TRUE	4	FALSE	FALSE	FALSE	FALSE	FALSE	FALSE	FALSE	TRUE	FALSE	TRUE	FALSE	FALSE	FALSE	FALSE	FALSE	TRUE	FALSE	TRUE	FALSE	FALSE	TRUE	FALSE	Prefer not to answer	Prefer not to answer	No patient safety incidents have occurred in my experience	Low risk	TRUE	4	FALSE	FALSE
ENGLISH	Nurse	Middle grade clinician, middle manager or ward level leader	FALSE	TRUE	TRUE	TRUE	FALSE	FALSE	FALSE		China	TRUE	TRUE	FALSE	FALSE	FALSE	5	TRUE	4	TRUE	FALSE	FALSE	TRUE	TRUE	TRUE	FALSE	FALSE	FALSE	TRUE	TRUE	FALSE	FALSE	FALSE	TRUE	TRUE	FALSE	TRUE	TRUE	TRUE	FALSE	FALSE	Both - in a separate space initially, then afterwards with them	Sometimes (more than once a month)	Low harm - little harm was caused to the patients	Low risk	TRUE	4	FALSE	TRUE
ENGLISH	Nurse	Middle grade clinician, middle manager or ward level leader	TRUE	TRUE	FALSE	FALSE	FALSE	FALSE	FALSE		China	TRUE	FALSE	FALSE	FALSE	FALSE	15	TRUE	3	TRUE	FALSE	FALSE	TRUE	TRUE	TRUE	FALSE	FALSE	FALSE	TRUE	FALSE	FALSE	FALSE	FALSE	FALSE	TRUE	FALSE	FALSE	TRUE	FALSE	FALSE	FALSE	Both - in a separate space initially, then afterwards with them	Sometimes (more than once a month)	Low harm - little harm was caused to the patients	Moderate risk	TRUE	3	TRUE	FALSE
ENGLISH	Nurse	Junior clinician, junior manager or junior ward staff	FALSE	FALSE	FALSE	FALSE	FALSE	FALSE	TRUE		Saudi Arabia	FALSE	TRUE	FALSE	FALSE	FALSE	15	TRUE	3	TRUE	FALSE	TRUE	TRUE	FALSE	TRUE	FALSE	FALSE	FALSE	FALSE	FALSE	FALSE	TRUE	FALSE	FALSE	FALSE	FALSE	TRUE	FALSE	FALSE	TRUE	FALSE	Prefer not to answer	Sometimes (more than once a month)	No harm came to the patients	Low risk	TRUE	3	TRUE	TRUE
ENGLISH	Nurse	Prefer not to answer	TRUE	FALSE	FALSE	FALSE	FALSE	FALSE	FALSE		Saudi Arabia	FALSE	FALSE	FALSE	TRUE	FALSE	5	TRUE	4	FALSE	FALSE	FALSE	FALSE	FALSE	TRUE	FALSE	FALSE	FALSE	TRUE	FALSE	FALSE	FALSE	FALSE	FALSE	FALSE	FALSE	TRUE	FALSE	TRUE	FALSE	FALSE	Yes - always with them	I don't know	Severe harm - they have caused Serious Incidents	High risk	TRUE	4	TRUE	FALSE
ENGLISH	Nurse	Senior level medical or nursing or other clinical leader	TRUE	FALSE	FALSE	FALSE	FALSE	FALSE	FALSE			FALSE	TRUE	FALSE	FALSE	FALSE	10	TRUE	4	FALSE	FALSE	TRUE	TRUE	FALSE	TRUE	FALSE	FALSE	FALSE	FALSE	FALSE	FALSE	FALSE	FALSE	TRUE	TRUE	FALSE	FALSE	TRUE	TRUE	FALSE	FALSE	No - always in a separate place	Occasionally (more than once a year)	No harm came to the patients	High risk	FALSE
ENGLISH	Nurse	Nurse	FALSE	FALSE	FALSE	FALSE	FALSE	FALSE	FALSE	Pediatric	China	FALSE	TRUE	FALSE	FALSE	FALSE	5	TRUE	4	FALSE	FALSE	FALSE	TRUE	FALSE	TRUE	FALSE	FALSE	FALSE	TRUE	FALSE	FALSE	FALSE	FALSE	FALSE	TRUE	FALSE	TRUE	FALSE	FALSE	FALSE	FALSE	Yes - always with them	Occasionally (more than once a year)	Low harm - little harm was caused to the patients	Low risk	FALSE
ENGLISH	Nurse	Senior level medical or nursing or other clinical leader	FALSE	FALSE	FALSE	TRUE	FALSE	FALSE	FALSE		Singapore	FALSE	FALSE	FALSE	FALSE	TRUE	5	TRUE	4	FALSE	FALSE	FALSE	FALSE	FALSE	TRUE	FALSE	FALSE	FALSE	TRUE	FALSE	FALSE	FALSE	FALSE	FALSE	FALSE	FALSE	FALSE	FALSE	FALSE	FALSE	FALSE	Both - in a separate space initially, then afterwards with them	Sometimes (more than once a month)	Low harm - little harm was caused to the patients	Moderate risk	FALSE
ENGLISH	Nurse	Senior level medical or nursing or other clinical leader	FALSE	FALSE	FALSE	TRUE	FALSE	FALSE	FALSE		Saudi Arabia	TRUE	TRUE	FALSE	FALSE	FALSE	15	TRUE	5	TRUE	FALSE	FALSE	FALSE	FALSE	FALSE	FALSE	FALSE	FALSE	TRUE	FALSE	FALSE	FALSE	FALSE	FALSE	FALSE	FALSE	FALSE	FALSE	FALSE	FALSE	FALSE	Yes - always with them	Rarely (less than once a year)	No patient safety incidents have occurred in my experience	Low risk	TRUE	5	FALSE	FALSE
ENGLISH	Nurse	Senior level medical or nursing or other clinical leader	TRUE	TRUE	TRUE	TRUE	TRUE	TRUE	FALSE		China	FALSE	TRUE	FALSE	FALSE	FALSE	15	TRUE	5	TRUE	FALSE	TRUE	TRUE	FALSE	FALSE	FALSE	FALSE	FALSE	TRUE	FALSE	FALSE	FALSE	FALSE	FALSE	FALSE	FALSE	TRUE	FALSE	TRUE	FALSE	FALSE	No - always in a separate place	Rarely (less than once a year)	No harm came to the patients	Low risk	TRUE	5	TRUE	FALSE
ENGLISH	Nurse	Senior level medical or nursing or other clinical leader	TRUE	FALSE	FALSE	FALSE	FALSE	FALSE	FALSE		China	FALSE	FALSE	FALSE	FALSE	TRUE	10	TRUE	5	TRUE	TRUE	TRUE	TRUE	TRUE	TRUE	FALSE	FALSE	FALSE	TRUE	TRUE	TRUE	TRUE	TRUE	TRUE	TRUE	FALSE	FALSE	FALSE	FALSE	TRUE	FALSE	Yes - always with them	Sometimes (more than once a month)	Low harm - little harm was caused to the patients	Moderate risk	TRUE	4	TRUE	FALSE
ENGLISH	Doctor	Junior clinician, junior manager or junior ward staff	FALSE	FALSE	FALSE	TRUE	FALSE	FALSE	FALSE			FALSE	TRUE	FALSE	FALSE	FALSE	5	TRUE	4	TRUE	TRUE	TRUE	FALSE	FALSE	TRUE	FALSE	FALSE	FALSE	TRUE	TRUE	FALSE	FALSE	TRUE	FALSE	FALSE	FALSE	FALSE	FALSE	FALSE	FALSE	FALSE	Both - in a separate space initially, then afterwards with them	Never (I have not experience this)	No patient safety incidents have occurred in my experience	I don't know	TRUE	4	FALSE	TRUE
ENGLISH	Nurse	Middle grade clinician, middle manager or ward level leader	FALSE	TRUE	FALSE	FALSE	FALSE	FALSE	FALSE		China	FALSE	TRUE	FALSE	FALSE	FALSE	5	TRUE	3	FALSE	TRUE	FALSE	TRUE	FALSE	TRUE	FALSE	FALSE	FALSE	TRUE	FALSE	FALSE	FALSE	FALSE	FALSE	TRUE	TRUE	TRUE	TRUE	FALSE	FALSE	FALSE	Sometimes - it varies	Rarely (less than once a year)	No patient safety incidents have occurred in my experience	Low risk	FALSE
ENGLISH	Nurse	Junior clinician, junior manager or junior ward staff	FALSE	TRUE	TRUE	FALSE	FALSE	FALSE	FALSE		China	FALSE	TRUE	FALSE	FALSE	FALSE	1	TRUE	4	TRUE	FALSE	TRUE	TRUE	FALSE	FALSE	FALSE	FALSE	FALSE	TRUE	FALSE	FALSE	FALSE	FALSE	TRUE	FALSE	FALSE	FALSE	FALSE	FALSE	FALSE	FALSE	Yes - always with them	Sometimes (more than once a month)	Moderate harm - the patients were harmed, but not severely	Low risk	TRUE	4	TRUE	FALSE
ENGLISH	Midwife	Junior clinician, junior manager or junior ward staff	TRUE	FALSE	FALSE	FALSE	FALSE	FALSE	FALSE		China	FALSE	TRUE	FALSE	FALSE	FALSE	15	TRUE	4	FALSE	FALSE	FALSE	FALSE	FALSE	TRUE	FALSE	FALSE	FALSE	TRUE	FALSE	FALSE	FALSE	FALSE	FALSE	TRUE	FALSE	TRUE	FALSE	FALSE	FALSE	FALSE	Both - in a separate space initially, then afterwards with them	Occasionally (more than once a year)	No harm came to the patients	Low risk	TRUE	3	FALSE	TRUE
ENGLISH	Nurse	Senior level medical or nursing or other clinical leader	FALSE	TRUE	FALSE	TRUE	FALSE	FALSE	FALSE		China	FALSE	TRUE	FALSE	FALSE	FALSE	15	TRUE	3	FALSE	FALSE	FALSE	TRUE	FALSE	TRUE	FALSE	FALSE	FALSE	TRUE	FALSE	FALSE	FALSE	FALSE	FALSE	TRUE	FALSE	FALSE	FALSE	FALSE	FALSE	FALSE	Yes - always with them	Sometimes (more than once a month)	Low harm - little harm was caused to the patients	Moderate risk	FALSE
ENGLISH	Nurse	Junior clinician, junior manager or junior ward staff	FALSE	FALSE	FALSE	TRUE	FALSE	FALSE	FALSE		China	FALSE	TRUE	FALSE	FALSE	FALSE	5	TRUE	5	TRUE	FALSE	FALSE	FALSE	FALSE	FALSE	FALSE	FALSE	FALSE	TRUE	FALSE	FALSE	FALSE	FALSE	FALSE	FALSE	FALSE	FALSE	FALSE	FALSE	FALSE	FALSE	Yes - always with them	Occasionally (more than once a year)	Low harm - little harm was caused to the patients	Moderate risk	TRUE	5	FALSE	FALSE
ENGLISH	Nurse	Senior level medical or nursing or other clinical leader	FALSE	TRUE	FALSE	FALSE	FALSE	FALSE	FALSE		Saudi Arabia	FALSE	TRUE	FALSE	FALSE	FALSE	5	TRUE	2	FALSE	TRUE	FALSE	FALSE	FALSE	TRUE	FALSE	FALSE	FALSE	FALSE	TRUE	TRUE	TRUE	FALSE	FALSE	FALSE	FALSE	FALSE	FALSE	FALSE	FALSE	FALSE	Both - in a separate space initially, then afterwards with them	Sometimes (more than once a month)	Moderate harm - the patients were harmed, but not severely	Moderate risk	TRUE	2	FALSE	TRUE
ENGLISH	Nurse	Junior clinician, junior manager or junior ward staff	FALSE	FALSE	FALSE	FALSE	FALSE	FALSE	FALSE	门诊	China	FALSE	TRUE	FALSE	FALSE	FALSE	1	TRUE	5	TRUE	FALSE	FALSE	FALSE	FALSE	FALSE	FALSE	FALSE	FALSE	TRUE	FALSE	FALSE	FALSE	FALSE	FALSE	FALSE	FALSE	FALSE	FALSE	FALSE	FALSE	FALSE	Yes - always with them	Very often (every day)	Severe harm - they have caused Serious Incidents	Very high risk	TRUE	5	TRUE	FALSE
ENGLISH	Nurse	Senior level medical or nursing or other clinical leader	FALSE	TRUE	FALSE	FALSE	FALSE	FALSE	FALSE		China	FALSE	TRUE	FALSE	FALSE	FALSE	15	TRUE	4	FALSE	FALSE	TRUE	FALSE	TRUE	FALSE	FALSE	FALSE	FALSE	TRUE	FALSE	FALSE	FALSE	FALSE	FALSE	FALSE	FALSE	FALSE	FALSE	FALSE	FALSE	FALSE	Yes - always with them	Rarely (less than once a year)	Low harm - little harm was caused to the patients	Prefer not to answer	TRUE	4	TRUE	FALSE
ENGLISH	Nurse	Junior clinician, junior manager or junior ward staff	FALSE	FALSE	TRUE	FALSE	FALSE	FALSE	FALSE		China	FALSE	TRUE	FALSE	FALSE	FALSE	10	TRUE	4	TRUE	TRUE	FALSE	FALSE	FALSE	TRUE	FALSE	FALSE	FALSE	FALSE	FALSE	FALSE	FALSE	FALSE	FALSE	TRUE	FALSE	TRUE	FALSE	FALSE	FALSE	FALSE	No - always in a separate place	Sometimes (more than once a month)	No harm came to the patients	Low risk	TRUE	4	FALSE	FALSE
ENGLISH	Nurse	Senior level medical or nursing or other clinical leader	FALSE	FALSE	TRUE	FALSE	FALSE	FALSE	FALSE		China	FALSE	TRUE	FALSE	FALSE	FALSE	15	TRUE	5	TRUE	TRUE	TRUE	TRUE	TRUE	TRUE	FALSE	FALSE	FALSE	TRUE	FALSE	FALSE	FALSE	FALSE	TRUE	TRUE	FALSE	TRUE	FALSE	FALSE	FALSE	FALSE	Yes - always with them	Rarely (less than once a year)	No harm came to the patients	Low risk	TRUE	5	TRUE	TRUE
ENGLISH	Nurse	Prefer not to answer	TRUE	TRUE	TRUE	TRUE	FALSE	FALSE	FALSE		China	FALSE	TRUE	FALSE	FALSE	FALSE	15	TRUE	4	TRUE	TRUE	FALSE	FALSE	FALSE	TRUE	FALSE	FALSE	FALSE	TRUE	TRUE	FALSE	TRUE	TRUE	FALSE	FALSE	FALSE	TRUE	FALSE	TRUE	FALSE	FALSE	Yes - always with them	Rarely (less than once a year)	No harm came to the patients	High risk	TRUE	3	TRUE	TRUE
ENGLISH	Nurse	Prefer not to answer	FALSE	TRUE	FALSE	FALSE	FALSE	FALSE	FALSE		China	FALSE	TRUE	FALSE	FALSE	FALSE	10	TRUE	4	FALSE	FALSE	FALSE	FALSE	FALSE	FALSE	TRUE	FALSE	FALSE	FALSE	TRUE	FALSE	FALSE	FALSE	FALSE	FALSE	FALSE	FALSE	FALSE	FALSE	FALSE	FALSE	Both - in a separate space initially, then afterwards with them	Rarely (less than once a year)	No patient safety incidents have occurred in my experience	Low risk	FALSE
ENGLISH	Nurse	Prefer not to answer	FALSE	FALSE	FALSE	FALSE	FALSE	FALSE	TRUE		China	FALSE	FALSE	FALSE	TRUE	FALSE	10	TRUE	4	FALSE	TRUE	FALSE	FALSE	FALSE	TRUE	FALSE	TRUE	FALSE	FALSE	FALSE	FALSE	FALSE	FALSE	FALSE	FALSE	FALSE	FALSE	FALSE	FALSE	FALSE	FALSE	Prefer not to answer	Prefer not to answer	Prefer not to answer	Prefer not to answer	TRUE	4	FALSE	FALSE
ENGLISH	Doctor	Middle grade clinician, middle manager or ward level leader	TRUE	FALSE	FALSE	FALSE	FALSE	FALSE	FALSE			FALSE	TRUE	FALSE	FALSE	FALSE	15	FALSE																												TRUE	5	FALSE	FALSE
ENGLISH	Nurse	Senior manager or leader (e.g. CEO, COO)	FALSE	FALSE	FALSE	TRUE	FALSE	FALSE	FALSE			FALSE	TRUE	FALSE	FALSE	FALSE	5	TRUE	5	FALSE	TRUE	FALSE	FALSE	FALSE	FALSE	FALSE	FALSE	FALSE	FALSE	TRUE	FALSE	FALSE	FALSE	FALSE	FALSE	FALSE	FALSE	FALSE	FALSE	FALSE	FALSE	No - always in a separate place	Often (more than once a week)	No harm came to the patients	No risk at all	TRUE	3	FALSE	TRUE
ENGLISH	Nurse	Middle grade clinician, middle manager or ward level leader	TRUE	FALSE	FALSE	FALSE	FALSE	FALSE	FALSE		Saudi Arabia	FALSE	TRUE	FALSE	FALSE	FALSE	15	TRUE	5	FALSE	TRUE	FALSE	FALSE	FALSE	FALSE	FALSE	FALSE	FALSE	TRUE	FALSE	FALSE	FALSE	FALSE	FALSE	FALSE	FALSE	FALSE	FALSE	FALSE	FALSE	FALSE	Both - in a separate space initially, then afterwards with them	Rarely (less than once a year)	I don't know the outcome	Moderate risk	FALSE
ENGLISH	Administrator or manager	Senior level medical or nursing or other clinical leader	TRUE	TRUE	TRUE	TRUE	FALSE	TRUE	FALSE			FALSE	TRUE	TRUE	FALSE	TRUE	15	TRUE	5	TRUE	TRUE	TRUE	TRUE	TRUE	TRUE	FALSE	FALSE	FALSE	TRUE	TRUE	TRUE	TRUE	TRUE	FALSE	FALSE	FALSE	FALSE	FALSE	FALSE	FALSE	FALSE	Yes - always with them	Never (I have not experience this)	Severe harm - they have caused Serious Incidents	Moderate risk	TRUE	5	FALSE	TRUE
ENGLISH	Nurse	Junior clinician, junior manager or junior ward staff	FALSE	FALSE	FALSE	TRUE	FALSE	FALSE	FALSE		China	FALSE	TRUE	FALSE	FALSE	FALSE	5	TRUE	5	TRUE	TRUE	TRUE	TRUE	FALSE	TRUE	FALSE	FALSE	FALSE	TRUE	FALSE	FALSE	FALSE	FALSE	FALSE	FALSE	FALSE	TRUE	FALSE	TRUE	FALSE	FALSE	Both - in a separate space initially, then afterwards with them	Rarely (less than once a year)	Severe harm - they have caused Serious Incidents	Very high risk	TRUE	4	TRUE	TRUE
ENGLISH	Nurse	Senior level medical or nursing or other clinical leader	FALSE	FALSE	FALSE	TRUE	FALSE	FALSE	FALSE		China	FALSE	FALSE	FALSE	TRUE	FALSE	15	TRUE	4	FALSE	FALSE	FALSE	TRUE	FALSE	FALSE	FALSE	FALSE	FALSE	TRUE	TRUE	FALSE	FALSE	FALSE	TRUE	TRUE	TRUE	TRUE	TRUE	TRUE	TRUE	FALSE	Yes - always with them	Occasionally (more than once a year)	Low harm - little harm was caused to the patients	Low risk	FALSE
ENGLISH	Nurse	Prefer not to answer	FALSE	FALSE	FALSE	FALSE	FALSE	FALSE	TRUE		China	FALSE	FALSE	FALSE	TRUE	FALSE	15	FALSE																												TRUE	3	FALSE	FALSE
ENGLISH	Nurse	Middle grade clinician, middle manager or ward level leader	FALSE	FALSE	TRUE	FALSE	FALSE	FALSE	FALSE			FALSE	TRUE	FALSE	FALSE	FALSE	15	TRUE	5	FALSE	FALSE	FALSE	FALSE	TRUE	TRUE	FALSE	FALSE	FALSE	TRUE	TRUE	TRUE	FALSE	FALSE	FALSE	FALSE	FALSE	FALSE	FALSE	FALSE	FALSE	FALSE	Yes - always with them	Very often (every day)	No harm came to the patients	No risk at all	FALSE
ENGLISH	Nurse	Middle grade clinician, middle manager or ward level leader	TRUE	FALSE	FALSE	FALSE	FALSE	FALSE	FALSE		China	FALSE	TRUE	FALSE	FALSE	FALSE	10	TRUE	4	FALSE	TRUE	FALSE	FALSE	TRUE	TRUE	FALSE	FALSE	FALSE	FALSE	TRUE	FALSE	FALSE	FALSE	FALSE	TRUE	FALSE	FALSE	FALSE	FALSE	FALSE	FALSE	Both - in a separate space initially, then afterwards with them	Sometimes (more than once a month)	Low harm - little harm was caused to the patients	Low risk	FALSE
ENGLISH	Nurse	Senior level medical or nursing or other clinical leader	FALSE	FALSE	FALSE	TRUE	FALSE	FALSE	FALSE		United Kingdom	FALSE	TRUE	FALSE	FALSE	FALSE	15	TRUE	5	FALSE	FALSE	FALSE	TRUE	FALSE	FALSE	FALSE	FALSE	FALSE	TRUE	TRUE	FALSE	TRUE	FALSE	FALSE	TRUE	FALSE	TRUE	TRUE	TRUE	FALSE	FALSE	Yes - always with them	Rarely (less than once a year)	No harm came to the patients	No risk at all	FALSE
ENGLISH	Nurse	Junior clinician, junior manager or junior ward staff	TRUE	FALSE	FALSE	FALSE	FALSE	FALSE	FALSE		China	FALSE	TRUE	FALSE	FALSE	FALSE	10	TRUE	5	TRUE	TRUE	TRUE	TRUE	TRUE	TRUE	FALSE	FALSE	FALSE	TRUE	TRUE	TRUE	TRUE	TRUE	TRUE	TRUE	TRUE	TRUE	TRUE	TRUE	TRUE	FALSE	Yes - always with them	Very often (every day)	No harm came to the patients	No risk at all	TRUE	5	TRUE	TRUE
ENGLISH	Nurse	Junior clinician, junior manager or junior ward staff	FALSE	FALSE	FALSE	TRUE	FALSE	FALSE	FALSE		China	FALSE	TRUE	FALSE	FALSE	TRUE	1	TRUE	5	TRUE	TRUE	TRUE	TRUE	FALSE	TRUE	FALSE	FALSE	FALSE	TRUE	FALSE	FALSE	FALSE	FALSE	FALSE	TRUE	FALSE	FALSE	FALSE	FALSE	FALSE	FALSE	Yes - always with them	Very often (every day)	Low harm - little harm was caused to the patients	Low risk	TRUE	5	TRUE	TRUE
ENGLISH	Nurse	Prefer not to answer	FALSE	TRUE	FALSE	FALSE	FALSE	FALSE	FALSE			FALSE	FALSE	FALSE	TRUE	FALSE	15	TRUE	2	FALSE	FALSE	FALSE	TRUE	FALSE	FALSE	FALSE	FALSE	FALSE	FALSE	FALSE	FALSE	FALSE	FALSE	FALSE	FALSE	FALSE	FALSE	FALSE	FALSE	FALSE	FALSE	Yes - always with them	Never (I have not experience this)	No patient safety incidents have occurred in my experience	No risk at all	FALSE
ENGLISH	Doctor	Junior clinician, junior manager or junior ward staff	TRUE	FALSE	FALSE	FALSE	FALSE	FALSE	FALSE		China	FALSE	FALSE	FALSE	TRUE	FALSE	15	FALSE																												TRUE	4	TRUE	FALSE
ENGLISH	Doctor	Senior level medical or nursing or other clinical leader	FALSE	TRUE	FALSE	TRUE	FALSE	FALSE	FALSE		China	TRUE	TRUE	FALSE	FALSE	FALSE	15	TRUE	5	TRUE	TRUE	FALSE	FALSE	FALSE	FALSE	FALSE	FALSE	FALSE	TRUE	FALSE	FALSE	FALSE	TRUE	TRUE	FALSE	FALSE	TRUE	FALSE	TRUE	FALSE	FALSE	No - always in a separate place	Rarely (less than once a year)	No harm came to the patients	Low risk	TRUE	4	TRUE	TRUE
ENGLISH	Nurse	Prefer not to answer	FALSE	FALSE	FALSE	TRUE	FALSE	FALSE	FALSE		China	TRUE	TRUE	FALSE	FALSE	FALSE	10	TRUE	5	TRUE	TRUE	TRUE	TRUE	TRUE	TRUE	FALSE	FALSE	FALSE	TRUE	FALSE	FALSE	FALSE	FALSE	FALSE	TRUE	TRUE	TRUE	TRUE	TRUE	TRUE	FALSE	No - always in a separate place	Occasionally (more than once a year)	No patient safety incidents have occurred in my experience	I don't know	FALSE
ENGLISH	Midwife	Junior clinician, junior manager or junior ward staff	TRUE	FALSE	FALSE	FALSE	FALSE	FALSE	FALSE			FALSE	FALSE	FALSE	FALSE	TRUE	5	TRUE	5	TRUE	TRUE	TRUE	TRUE	TRUE	TRUE	FALSE	FALSE	FALSE	TRUE	TRUE	TRUE	TRUE	FALSE	FALSE	FALSE	TRUE	TRUE	FALSE	FALSE	FALSE	FALSE	Yes - always with them	Often (more than once a week)	Low harm - little harm was caused to the patients	Moderate risk	TRUE	5	FALSE	FALSE
ENGLISH	Nurse	Prefer not to answer	FALSE	FALSE	FALSE	FALSE	FALSE	FALSE	FALSE	obgyn	China	FALSE	TRUE	FALSE	FALSE	FALSE	10	TRUE	5	FALSE	FALSE	FALSE	FALSE	TRUE	FALSE	FALSE	FALSE	FALSE	TRUE	FALSE	FALSE	FALSE	FALSE	FALSE	FALSE	FALSE	FALSE	FALSE	FALSE	FALSE	FALSE	No - always in a separate place	Never (I have not experience this)	No patient safety incidents have occurred in my experience	Low risk	TRUE	4	FALSE	TRUE
ENGLISH	Nurse	Prefer not to answer	FALSE	FALSE	TRUE	FALSE	FALSE	FALSE	FALSE		China	FALSE	TRUE	FALSE	FALSE	FALSE	10	FALSE																												FALSE
ENGLISH	Midwife	Junior clinician, junior manager or junior ward staff	FALSE	FALSE	FALSE	FALSE	FALSE	FALSE	TRUE			FALSE	FALSE	FALSE	TRUE	FALSE	5	TRUE	5	TRUE	TRUE	TRUE	TRUE	TRUE	TRUE	FALSE	FALSE	FALSE	TRUE	TRUE	TRUE	TRUE	TRUE	TRUE	FALSE	FALSE	FALSE	FALSE	FALSE	FALSE	FALSE	Yes - always with them	Sometimes (more than once a month)	Moderate harm - the patients were harmed, but not severely	Moderate risk	FALSE
ENGLISH	Midwife	Junior clinician, junior manager or junior ward staff	FALSE	FALSE	FALSE	FALSE	FALSE	FALSE	TRUE			FALSE	TRUE	FALSE	FALSE	FALSE	5	TRUE	5	TRUE	TRUE	TRUE	TRUE	TRUE	TRUE	FALSE	FALSE	FALSE	TRUE	TRUE	TRUE	TRUE	TRUE	TRUE	TRUE	TRUE	TRUE	FALSE	FALSE	FALSE	FALSE	Yes - always with them	Prefer not to answer	No patient safety incidents have occurred in my experience	Prefer not to answer	TRUE	5	TRUE	TRUE
ENGLISH	Nurse	Junior clinician, junior manager or junior ward staff	FALSE	FALSE	FALSE	FALSE	FALSE	FALSE	TRUE			FALSE	FALSE	FALSE	TRUE	FALSE	10	TRUE	4	FALSE	TRUE	FALSE	TRUE	FALSE	FALSE	FALSE	FALSE	FALSE	TRUE	FALSE	FALSE	FALSE	FALSE	FALSE	TRUE	FALSE	TRUE	FALSE	TRUE	FALSE	FALSE	Yes - always with them	Never (I have not experience this)	I don't know the outcome	Low risk	TRUE	3	FALSE	TRUE
ENGLISH	Nurse	Junior clinician, junior manager or junior ward staff	FALSE	FALSE	FALSE	FALSE	TRUE	TRUE	FALSE			FALSE	FALSE	FALSE	TRUE	FALSE	10	TRUE	3	FALSE	TRUE	FALSE	FALSE	FALSE	TRUE	FALSE	FALSE	FALSE	TRUE	FALSE	FALSE	FALSE	FALSE	FALSE	TRUE	FALSE	FALSE	FALSE	TRUE	FALSE	FALSE	I don't know	Rarely (less than once a year)	No harm came to the patients	No risk at all	TRUE	4	FALSE	TRUE
ENGLISH	Nurse	Junior clinician, junior manager or junior ward staff	TRUE	TRUE	TRUE	TRUE	TRUE	TRUE	TRUE		China	TRUE	TRUE	TRUE	FALSE	FALSE	0	TRUE	4	TRUE	TRUE	TRUE	TRUE	TRUE	TRUE	FALSE	FALSE	FALSE	TRUE	TRUE	TRUE	TRUE	TRUE	TRUE	TRUE	TRUE	TRUE	TRUE	TRUE	TRUE	FALSE	Yes - always with them	Very often (every day)	Severe harm - they have caused Serious Incidents	High risk	TRUE	4	TRUE	TRUE
ENGLISH	Nurse	Junior clinician, junior manager or junior ward staff	FALSE	TRUE	TRUE	FALSE	TRUE	TRUE	FALSE		China	FALSE	TRUE	FALSE	FALSE	FALSE	10	TRUE	5	FALSE	TRUE	FALSE	FALSE	FALSE	FALSE	FALSE	FALSE	FALSE	TRUE	FALSE	FALSE	FALSE	FALSE	FALSE	FALSE	FALSE	FALSE	FALSE	FALSE	FALSE	FALSE	Yes - always with them	Often (more than once a week)	No patient safety incidents have occurred in my experience	Low risk	FALSE
ENGLISH	Nurse	Prefer not to answer	FALSE	FALSE	FALSE	TRUE	FALSE	FALSE	FALSE		China	FALSE	FALSE	FALSE	TRUE	FALSE	1	TRUE	3	FALSE	TRUE	FALSE	FALSE	FALSE	FALSE	FALSE	FALSE	FALSE	FALSE	FALSE	FALSE	FALSE	FALSE	TRUE	FALSE	FALSE	FALSE	FALSE	FALSE	FALSE	FALSE	Both - in a separate space initially, then afterwards with them	Occasionally (more than once a year)	No harm came to the patients	Low risk	TRUE	3	FALSE	TRUE
ENGLISH	Midwife	Junior clinician, junior manager or junior ward staff	FALSE	FALSE	FALSE	TRUE	TRUE	TRUE	FALSE			FALSE	TRUE	FALSE	FALSE	FALSE	5	TRUE	3	TRUE	TRUE	FALSE	FALSE	FALSE	TRUE	FALSE	FALSE	FALSE	TRUE	TRUE	FALSE	FALSE	FALSE	FALSE	TRUE	FALSE	FALSE	FALSE	TRUE	FALSE	FALSE	Never - we use online or phone-based systems	Rarely (less than once a year)	No harm came to the patients	Low risk	TRUE	3	FALSE	TRUE
ENGLISH	Nurse	Junior clinician, junior manager or junior ward staff	TRUE	FALSE	FALSE	FALSE	FALSE	FALSE	FALSE			FALSE	TRUE	FALSE	FALSE	FALSE	1	TRUE	4	TRUE	TRUE	TRUE	TRUE	TRUE	TRUE	FALSE	FALSE	FALSE	TRUE	FALSE	TRUE	FALSE	FALSE	FALSE	FALSE	FALSE	TRUE	FALSE	FALSE	FALSE	FALSE	Yes - always with them	Very often (every day)	No patient safety incidents have occurred in my experience	Low risk	TRUE	4	TRUE	TRUE
ENGLISH	Administrator or manager	Senior level medical or nursing or other clinical leader	TRUE	TRUE	TRUE	TRUE	FALSE	FALSE	FALSE			FALSE	TRUE	FALSE	FALSE	FALSE	5	TRUE	5	TRUE	TRUE	FALSE	FALSE	TRUE	FALSE	FALSE	FALSE	FALSE	FALSE	TRUE	FALSE	TRUE	FALSE	FALSE	TRUE	FALSE	FALSE	TRUE	FALSE	FALSE	FALSE	Yes - always with them	Very often (every day)	Severe harm - they have caused Serious Incidents	I don't know	TRUE	5	TRUE	TRUE
ENGLISH	Administrator or manager	Senior level medical or nursing or other clinical leader	TRUE	FALSE	FALSE	FALSE	FALSE	FALSE	FALSE		China	TRUE	FALSE	FALSE	FALSE	FALSE	15	TRUE	5	TRUE	TRUE	TRUE	FALSE	FALSE	FALSE	FALSE	FALSE	FALSE	TRUE	FALSE	FALSE	FALSE	FALSE	TRUE	FALSE	FALSE	FALSE	FALSE	FALSE	FALSE	FALSE	Yes - always with them	Rarely (less than once a year)	No harm came to the patients	Low risk	FALSE
ENGLISH	Nurse	Senior level medical or nursing or other clinical leader	TRUE	FALSE	FALSE	FALSE	FALSE	FALSE	FALSE		Singapore	FALSE	TRUE	FALSE	FALSE	FALSE	5	TRUE	3	TRUE	TRUE	TRUE	FALSE	FALSE	FALSE	FALSE	FALSE	FALSE	TRUE	TRUE	TRUE	TRUE	TRUE	TRUE	TRUE	TRUE	TRUE	TRUE	TRUE	TRUE	TRUE	Yes - always with them	Very often (every day)	Low harm - little harm was caused to the patients	Low risk	TRUE	4	TRUE	FALSE
ENGLISH	Nurse	Middle grade clinician, middle manager or ward level leader	TRUE	FALSE	FALSE	FALSE	FALSE	FALSE	FALSE		China	FALSE	TRUE	FALSE	FALSE	FALSE	15	TRUE	5	TRUE	TRUE	TRUE	TRUE	TRUE	TRUE	FALSE	FALSE	FALSE	TRUE	TRUE	TRUE	TRUE	TRUE	TRUE	TRUE	TRUE	TRUE	TRUE	TRUE	TRUE	FALSE	Both - in a separate space initially, then afterwards with them	Rarely (less than once a year)	No patient safety incidents have occurred in my experience	Low risk	TRUE	5	TRUE	TRUE
ENGLISH	Nurse	Junior clinician, junior manager or junior ward staff	FALSE	TRUE	FALSE	FALSE	TRUE	TRUE	FALSE		United Kingdom	FALSE	TRUE	FALSE	FALSE	FALSE	10	TRUE	3	FALSE	FALSE	FALSE	FALSE	FALSE	FALSE	TRUE	FALSE	FALSE	FALSE	FALSE	FALSE	FALSE	FALSE	FALSE	TRUE	FALSE	FALSE	FALSE	TRUE	FALSE	FALSE	Yes - always with them	Sometimes (more than once a month)	No patient safety incidents have occurred in my experience	Low risk	FALSE
ENGLISH	Nurse	Junior clinician, junior manager or junior ward staff	TRUE	FALSE	FALSE	FALSE	FALSE	FALSE	FALSE		China	FALSE	FALSE	FALSE	TRUE	FALSE	5	TRUE	4	FALSE	FALSE	FALSE	TRUE	FALSE	FALSE	FALSE	FALSE	FALSE	TRUE	FALSE	TRUE	TRUE	FALSE	FALSE	FALSE	FALSE	FALSE	FALSE	FALSE	FALSE	FALSE	Sometimes - it varies	Occasionally (more than once a year)	No harm came to the patients	No risk at all	TRUE	4	FALSE	FALSE
ENGLISH	Administrator or manager	Senior level medical or nursing or other clinical leader	FALSE	FALSE	TRUE	FALSE	FALSE	FALSE	FALSE		United Kingdom	FALSE	TRUE	FALSE	FALSE	FALSE	15	TRUE	3	TRUE	FALSE	TRUE	TRUE	FALSE	TRUE	FALSE	FALSE	FALSE	TRUE	FALSE	FALSE	TRUE	FALSE	TRUE	TRUE	FALSE	TRUE	TRUE	FALSE	FALSE	FALSE	Both - in a separate space initially, then afterwards with them	Sometimes (more than once a month)	No harm came to the patients	Low risk	FALSE
ENGLISH	Nurse	Prefer not to answer	FALSE	FALSE	FALSE	FALSE	FALSE	FALSE	TRUE			FALSE	FALSE	FALSE	TRUE	FALSE	10	TRUE	3	FALSE	FALSE	FALSE	TRUE	FALSE	FALSE	FALSE	FALSE	FALSE	FALSE	FALSE	FALSE	FALSE	FALSE	FALSE	FALSE	FALSE	TRUE	FALSE	FALSE	FALSE	FALSE	Prefer not to answer	Rarely (less than once a year)	I don't know the outcome	Low risk	FALSE
ENGLISH	Nurse	Senior level medical or nursing or other clinical leader	TRUE	FALSE	FALSE	FALSE	FALSE	FALSE	FALSE		Canada	FALSE	FALSE	FALSE	FALSE	TRUE	15	TRUE	4	FALSE	FALSE	FALSE	TRUE	FALSE	FALSE	FALSE	FALSE	FALSE	TRUE	FALSE	FALSE	FALSE	FALSE	FALSE	FALSE	FALSE	FALSE	FALSE	FALSE	FALSE	FALSE	No - always in a separate place	Sometimes (more than once a month)	Prefer not to answer	Prefer not to answer	FALSE
ENGLISH	Nurse	Senior level medical or nursing or other clinical leader	TRUE	FALSE	FALSE	FALSE	FALSE	FALSE	FALSE		Saudi Arabia	TRUE	FALSE	FALSE	FALSE	FALSE	15	TRUE	4	FALSE	FALSE	FALSE	TRUE	FALSE	FALSE	FALSE	FALSE	FALSE	TRUE	FALSE	FALSE	FALSE	FALSE	FALSE	TRUE	FALSE	FALSE	TRUE	TRUE	FALSE	FALSE	I don't know	Rarely (less than once a year)	No patient safety incidents have occurred in my experience	Low risk	FALSE
ENGLISH	Administrator or manager	Junior clinician, junior manager or junior ward staff	FALSE	FALSE	TRUE	FALSE	FALSE	FALSE	FALSE		Saudi Arabia	FALSE	TRUE	FALSE	FALSE	FALSE	10	TRUE	4	TRUE	TRUE	FALSE	FALSE	FALSE	TRUE	FALSE	FALSE	FALSE	TRUE	FALSE	FALSE	FALSE	FALSE	FALSE	TRUE	FALSE	TRUE	FALSE	FALSE	FALSE	FALSE	Both - in a separate space initially, then afterwards with them	Never (I have not experience this)	No patient safety incidents have occurred in my experience	Low risk	TRUE	3	TRUE	FALSE
ENGLISH	Nurse	Prefer not to answer	FALSE	FALSE	FALSE	TRUE	FALSE	FALSE	FALSE		China	FALSE	TRUE	FALSE	FALSE	FALSE	10	FALSE																												TRUE	4	TRUE	TRUE
ENGLISH	Doctor	Senior level medical or nursing or other clinical leader	FALSE	FALSE	TRUE	FALSE	FALSE	FALSE	FALSE		United Arab Emirates	FALSE	TRUE	FALSE	FALSE	FALSE	15	TRUE	3	TRUE	TRUE	FALSE	FALSE	TRUE	TRUE	FALSE	FALSE	FALSE	TRUE	FALSE	FALSE	FALSE	TRUE	FALSE	FALSE	FALSE	TRUE	FALSE	TRUE	FALSE	FALSE	No - always in a separate place	Occasionally (more than once a year)	Low harm - little harm was caused to the patients	Moderate risk	TRUE	3	TRUE	TRUE
ENGLISH	CMO	Senior manager or leader (e.g. CEO, COO)	FALSE	FALSE	FALSE	TRUE	TRUE	FALSE	FALSE			TRUE	TRUE	FALSE	FALSE	FALSE	15	FALSE																												FALSE
ENGLISH	Administrator or manager	Senior manager or leader (e.g. CEO, COO)	FALSE	FALSE	FALSE	FALSE	TRUE	FALSE	FALSE		China	FALSE	TRUE	FALSE	FALSE	FALSE	15	FALSE																												FALSE
ENGLISH	Administrator or manager	Senior level medical or nursing or other clinical leader	FALSE	FALSE	FALSE	TRUE	FALSE	FALSE	FALSE		China	FALSE	TRUE	FALSE	FALSE	FALSE	10	TRUE	4	TRUE	TRUE	TRUE	TRUE	TRUE	FALSE	FALSE	FALSE	FALSE	TRUE	TRUE	TRUE	TRUE	FALSE	FALSE	FALSE	FALSE	FALSE	FALSE	FALSE	FALSE	FALSE	Yes - always with them	Very often (every day)	Low harm - little harm was caused to the patients	Low risk	TRUE	4	TRUE	TRUE
ENGLISH	Nurse	Middle grade clinician, middle manager or ward level leader	TRUE	FALSE	FALSE	FALSE	FALSE	FALSE	FALSE		China	TRUE	FALSE	FALSE	FALSE	FALSE	15	TRUE	4	FALSE	TRUE	TRUE	FALSE	FALSE	FALSE	FALSE	FALSE	FALSE	TRUE	FALSE	FALSE	TRUE	FALSE	FALSE	FALSE	FALSE	FALSE	FALSE	FALSE	FALSE	FALSE	Both - in a separate space initially, then afterwards with them	Rarely (less than once a year)	No patient safety incidents have occurred in my experience	Low risk	TRUE	3	FALSE	TRUE
ENGLISH	Nurse	Senior level medical or nursing or other clinical leader	TRUE	FALSE	TRUE	FALSE	FALSE	FALSE	FALSE			FALSE	TRUE	FALSE	FALSE	FALSE	15	TRUE	4	TRUE	TRUE	TRUE	TRUE	TRUE	TRUE	FALSE	FALSE	FALSE	TRUE	FALSE	FALSE	FALSE	FALSE	FALSE	TRUE	FALSE	TRUE	TRUE	TRUE	FALSE	FALSE	Yes - always with them	Occasionally (more than once a year)	No harm came to the patients	Low risk	TRUE	3	TRUE	FALSE
ENGLISH	Nurse	Senior level medical or nursing or other clinical leader	TRUE	FALSE	FALSE	FALSE	FALSE	FALSE	FALSE		China	FALSE	TRUE	FALSE	FALSE	FALSE	5	TRUE	5	TRUE	FALSE	TRUE	TRUE	FALSE	TRUE	FALSE	FALSE	FALSE	FALSE	FALSE	FALSE	FALSE	FALSE	FALSE	TRUE	FALSE	TRUE	TRUE	TRUE	TRUE	FALSE	Sometimes - it varies	Rarely (less than once a year)	No patient safety incidents have occurred in my experience	Low risk	TRUE	5	TRUE	FALSE
ENGLISH	Doctor	Senior level medical or nursing or other clinical leader	TRUE	FALSE	FALSE	FALSE	FALSE	FALSE	FALSE			FALSE	TRUE	FALSE	FALSE	FALSE	10	TRUE	4	FALSE	FALSE	TRUE	FALSE	FALSE	TRUE	FALSE	FALSE	FALSE	TRUE	FALSE	FALSE	FALSE	FALSE	FALSE	TRUE	FALSE	TRUE	TRUE	FALSE	FALSE	FALSE	Sometimes - it varies	Occasionally (more than once a year)	Prefer not to answer	High risk	TRUE	4	FALSE	FALSE
ENGLISH	Doctor	Senior level medical or nursing or other clinical leader	FALSE	FALSE	FALSE	FALSE	FALSE	TRUE	FALSE		China	FALSE	TRUE	FALSE	FALSE	FALSE	15	TRUE	2	TRUE	TRUE	TRUE	FALSE	FALSE	FALSE	FALSE	FALSE	FALSE	TRUE	FALSE	FALSE	FALSE	FALSE	FALSE	FALSE	FALSE	TRUE	TRUE	TRUE	FALSE	FALSE	No - always in a separate place	Occasionally (more than once a year)	I don't know the outcome	Very high risk	TRUE	2	TRUE	TRUE
ENGLISH	Nurse	Middle grade clinician, middle manager or ward level leader	FALSE	FALSE	FALSE	TRUE	FALSE	FALSE	FALSE			FALSE	TRUE	FALSE	FALSE	FALSE	15	TRUE	4	FALSE	FALSE	FALSE	TRUE	FALSE	TRUE	FALSE	FALSE	FALSE	FALSE	FALSE	FALSE	TRUE	FALSE	TRUE	TRUE	FALSE	TRUE	TRUE	TRUE	TRUE	FALSE	Sometimes - it varies	Rarely (less than once a year)	No patient safety incidents have occurred in my experience	Low risk	TRUE	4	FALSE	FALSE
ENGLISH	Nursing Admin	Senior level medical or nursing or other clinical leader	FALSE	FALSE	FALSE	FALSE	FALSE	FALSE	FALSE	management		TRUE	FALSE	FALSE	FALSE	FALSE	15	TRUE	4	FALSE	FALSE	TRUE	TRUE	TRUE	TRUE	FALSE	FALSE	FALSE	FALSE	TRUE	FALSE	FALSE	FALSE	FALSE	FALSE	FALSE	TRUE	FALSE	FALSE	FALSE	FALSE	No - always in a separate place	Sometimes (more than once a month)	Prefer not to answer	Moderate risk	FALSE
ENGLISH	Nurse	Middle grade clinician, middle manager or ward level leader	TRUE	FALSE	FALSE	FALSE	FALSE	FALSE	FALSE		China	FALSE	TRUE	FALSE	FALSE	FALSE	5	TRUE	3	TRUE	FALSE	FALSE	TRUE	TRUE	TRUE	FALSE	FALSE	FALSE	TRUE	FALSE	FALSE	FALSE	FALSE	FALSE	FALSE	FALSE	FALSE	FALSE	FALSE	FALSE	FALSE	Sometimes - it varies	Occasionally (more than once a year)	No harm came to the patients	I don't know	TRUE	3	TRUE	FALSE
ENGLISH	Nurse	Senior level medical or nursing or other clinical leader	FALSE	FALSE	FALSE	TRUE	FALSE	FALSE	FALSE			FALSE	TRUE	FALSE	FALSE	FALSE	15	TRUE	5	TRUE	TRUE	TRUE	TRUE	TRUE	TRUE	FALSE	FALSE	FALSE	TRUE	TRUE	FALSE	FALSE	TRUE	TRUE	FALSE	FALSE	TRUE	TRUE	TRUE	FALSE	FALSE	Yes - always with them	Occasionally (more than once a year)	Low harm - little harm was caused to the patients	Low risk	TRUE	5	TRUE	TRUE
ENGLISH	Administrator or manager	Senior manager or leader (e.g. CEO, COO)	FALSE	FALSE	FALSE	TRUE	FALSE	FALSE	FALSE		China	FALSE	TRUE	FALSE	FALSE	FALSE	15	TRUE	5	FALSE	TRUE	TRUE	FALSE	FALSE	FALSE	FALSE	FALSE	FALSE	FALSE	TRUE	FALSE	TRUE	TRUE	FALSE	FALSE	TRUE	TRUE	TRUE	TRUE	FALSE	FALSE	Both - in a separate space initially, then afterwards with them	Very often (every day)	Moderate harm - the patients were harmed, but not severely	Moderate risk	TRUE	4	TRUE	TRUE
ENGLISH	Nurse	Senior level medical or nursing or other clinical leader	FALSE	TRUE	FALSE	TRUE	TRUE	FALSE	FALSE		China	FALSE	TRUE	FALSE	FALSE	FALSE	5	TRUE	5	TRUE	TRUE	TRUE	TRUE	TRUE	TRUE	FALSE	FALSE	FALSE	TRUE	FALSE	FALSE	FALSE	FALSE	TRUE	TRUE	FALSE	TRUE	TRUE	TRUE	TRUE	FALSE	Yes - always with them	Rarely (less than once a year)	No patient safety incidents have occurred in my experience	Low risk	TRUE	2	FALSE	FALSE
ENGLISH	Administrator or manager	Senior level medical or nursing or other clinical leader	FALSE	FALSE	FALSE	FALSE	FALSE	FALSE	FALSE	NURSING ADMINISTRATION	China	FALSE	TRUE	FALSE	FALSE	FALSE	15	TRUE	5	FALSE	FALSE	FALSE	TRUE	FALSE	FALSE	FALSE	FALSE	FALSE	TRUE	FALSE	FALSE	FALSE	FALSE	FALSE	FALSE	FALSE	FALSE	FALSE	FALSE	FALSE	FALSE	Yes - always with them	Sometimes (more than once a month)	No patient safety incidents have occurred in my experience	Low risk	FALSE
ENGLISH	Nurse	Prefer not to answer	FALSE	FALSE	TRUE	TRUE	FALSE	TRUE	FALSE		China	FALSE	FALSE	TRUE	FALSE	FALSE	5	TRUE	4	FALSE	FALSE	TRUE	TRUE	FALSE	TRUE	FALSE	FALSE	FALSE	FALSE	FALSE	FALSE	FALSE	FALSE	TRUE	FALSE	FALSE	FALSE	TRUE	FALSE	FALSE	FALSE	Never - we use online or phone-based systems	Occasionally (more than once a year)	No harm came to the patients	Moderate risk	FALSE
ENGLISH	Nurse	Senior level medical or nursing or other clinical leader	FALSE	FALSE	TRUE	TRUE	FALSE	FALSE	FALSE		United States of America	FALSE	TRUE	FALSE	FALSE	FALSE	15	TRUE	3	TRUE	FALSE	FALSE	TRUE	TRUE	FALSE	FALSE	FALSE	FALSE	TRUE	FALSE	FALSE	FALSE	FALSE	FALSE	FALSE	FALSE	TRUE	TRUE	TRUE	FALSE	FALSE	Yes - always with them	Sometimes (more than once a month)	Moderate harm - the patients were harmed, but not severely	Moderate risk	TRUE	4	FALSE	FALSE
ENGLISH	Nurse	Senior level medical or nursing or other clinical leader	FALSE	FALSE	FALSE	FALSE	FALSE	FALSE	TRUE		China	FALSE	TRUE	FALSE	FALSE	FALSE	15	TRUE	4	FALSE	TRUE	FALSE	FALSE	FALSE	FALSE	FALSE	FALSE	FALSE	FALSE	FALSE	FALSE	FALSE	FALSE	FALSE	FALSE	FALSE	TRUE	FALSE	TRUE	FALSE	FALSE	Prefer not to answer	Rarely (less than once a year)	No harm came to the patients	Prefer not to answer	TRUE	5	FALSE	TRUE
ENGLISH	Nurse	Senior level medical or nursing or other clinical leader	TRUE	FALSE	FALSE	FALSE	FALSE	FALSE	FALSE		China	FALSE	TRUE	FALSE	FALSE	FALSE	15	TRUE	4	TRUE	TRUE	TRUE	FALSE	FALSE	FALSE	FALSE	FALSE	FALSE	TRUE	FALSE	FALSE	FALSE	FALSE	FALSE	TRUE	FALSE	TRUE	TRUE	TRUE	FALSE	FALSE	Yes - always with them	Rarely (less than once a year)	No harm came to the patients	Low risk	FALSE
ENGLISH	Nurse	Senior level medical or nursing or other clinical leader	TRUE	FALSE	FALSE	FALSE	TRUE	FALSE	FALSE		China	FALSE	FALSE	FALSE	TRUE	FALSE	5	FALSE																												FALSE
ENGLISH	Nurse	Prefer not to answer	FALSE	FALSE	FALSE	TRUE	FALSE	FALSE	FALSE		China	FALSE	TRUE	FALSE	FALSE	FALSE	1	TRUE	3	FALSE	TRUE	TRUE	TRUE	FALSE	FALSE	FALSE	FALSE	FALSE	FALSE	FALSE	FALSE	FALSE	FALSE	FALSE	FALSE	FALSE	FALSE	FALSE	FALSE	FALSE	FALSE	Both - in a separate space initially, then afterwards with them	Occasionally (more than once a year)	No patient safety incidents have occurred in my experience	I don't know	TRUE	5	TRUE	TRUE
ENGLISH	Nurse	Prefer not to answer	FALSE	FALSE	FALSE	FALSE	FALSE	FALSE	TRUE		China	FALSE	TRUE	FALSE	FALSE	FALSE	5	TRUE	4	FALSE	FALSE	FALSE	FALSE	FALSE	FALSE	FALSE	TRUE	FALSE	FALSE	FALSE	FALSE	FALSE	FALSE	TRUE	FALSE	FALSE	FALSE	TRUE	FALSE	FALSE	FALSE	Prefer not to answer	Rarely (less than once a year)	Prefer not to answer	High risk	TRUE	4	TRUE	FALSE
ENGLISH	Nurse	Junior clinician, junior manager or junior ward staff	FALSE	FALSE	FALSE	TRUE	TRUE	TRUE	FALSE		China	FALSE	FALSE	FALSE	TRUE	FALSE	0	TRUE	5	FALSE	FALSE	FALSE	TRUE	FALSE	FALSE	FALSE	FALSE	FALSE	FALSE	FALSE	FALSE	FALSE	FALSE	TRUE	FALSE	FALSE	FALSE	FALSE	FALSE	FALSE	FALSE	Yes - always with them	Rarely (less than once a year)	No harm came to the patients	Low risk	TRUE	5	FALSE	FALSE
ENGLISH	Nurse	Senior level medical or nursing or other clinical leader	TRUE	FALSE	FALSE	TRUE	FALSE	FALSE	FALSE		Saudi Arabia	FALSE	TRUE	FALSE	FALSE	FALSE	10	TRUE	5	TRUE	TRUE	TRUE	FALSE	FALSE	TRUE	FALSE	FALSE	FALSE	TRUE	FALSE	FALSE	FALSE	FALSE	TRUE	FALSE	FALSE	TRUE	TRUE	TRUE	FALSE	FALSE	Yes - always with them	I don't know	Moderate harm - the patients were harmed, but not severely	High risk	FALSE
ENGLISH	Nurse	Senior level medical or nursing or other clinical leader	TRUE	FALSE	FALSE	FALSE	FALSE	FALSE	FALSE		United Kingdom	FALSE	FALSE	FALSE	TRUE	FALSE	5	TRUE	4	FALSE	FALSE	FALSE	TRUE	FALSE	FALSE	FALSE	FALSE	FALSE	FALSE	FALSE	FALSE	FALSE	FALSE	FALSE	FALSE	FALSE	TRUE	FALSE	FALSE	FALSE	FALSE	Yes - always with them	Often (more than once a week)	No harm came to the patients	Low risk	TRUE	5	TRUE	FALSE
ENGLISH	Nurse	Senior level medical or nursing or other clinical leader	TRUE	TRUE	FALSE	FALSE	TRUE	FALSE	FALSE		Saudi Arabia	FALSE	TRUE	FALSE	FALSE	FALSE	15	TRUE	4	FALSE	TRUE	FALSE	TRUE	FALSE	TRUE	FALSE	FALSE	FALSE	TRUE	FALSE	FALSE	FALSE	FALSE	TRUE	TRUE	FALSE	TRUE	FALSE	FALSE	FALSE	FALSE	Yes - always with them	Rarely (less than once a year)	Low harm - little harm was caused to the patients	Low risk	FALSE
ENGLISH	Nurse	Senior level medical or nursing or other clinical leader	FALSE	FALSE	FALSE	FALSE	FALSE	FALSE	FALSE	school nurse	China	FALSE	TRUE	FALSE	FALSE	FALSE	15	TRUE	4	FALSE	FALSE	TRUE	FALSE	FALSE	FALSE	FALSE	FALSE	FALSE	FALSE	FALSE	FALSE	FALSE	FALSE	TRUE	FALSE	FALSE	FALSE	FALSE	FALSE	FALSE	FALSE	Yes - always with them	Very often (every day)	Low harm - little harm was caused to the patients	Moderate risk	TRUE	4	TRUE	FALSE
ENGLISH	Administrator or manager	Middle grade clinician, middle manager or ward level leader	FALSE	FALSE	FALSE	TRUE	FALSE	FALSE	TRUE		China	FALSE	TRUE	FALSE	FALSE	FALSE	15	TRUE	5	TRUE	FALSE	FALSE	FALSE	FALSE	FALSE	FALSE	FALSE	FALSE	TRUE	FALSE	FALSE	FALSE	FALSE	FALSE	FALSE	FALSE	TRUE	TRUE	TRUE	TRUE	FALSE	Both - in a separate space initially, then afterwards with them	Occasionally (more than once a year)	Low harm - little harm was caused to the patients	Moderate risk	TRUE	4	TRUE	FALSE
ENGLISH	Nurse	Senior level medical or nursing or other clinical leader	TRUE	FALSE	FALSE	FALSE	FALSE	FALSE	FALSE		China	TRUE	FALSE	FALSE	FALSE	FALSE	15	TRUE	4	TRUE	FALSE	FALSE	FALSE	FALSE	FALSE	FALSE	FALSE	FALSE	FALSE	FALSE	FALSE	FALSE	FALSE	FALSE	FALSE	FALSE	FALSE	FALSE	FALSE	TRUE	FALSE	Yes - always with them	Rarely (less than once a year)	No harm came to the patients	Low risk	FALSE
ENGLISH	Nurse	Senior level medical or nursing or other clinical leader	TRUE	FALSE	FALSE	FALSE	FALSE	FALSE	FALSE		China	FALSE	TRUE	FALSE	FALSE	FALSE	15	TRUE	4										TRUE	FALSE	FALSE	FALSE	FALSE	TRUE	FALSE	FALSE	FALSE	FALSE	FALSE	FALSE	FALSE	Yes - always with them	Never (I have not experience this)	Prefer not to answer	Low risk	FALSE
ENGLISH	Paramedic or ambulance worker	Middle grade clinician, middle manager or ward level leader	FALSE	TRUE	FALSE	FALSE	FALSE	FALSE	FALSE			TRUE	FALSE	FALSE	FALSE	FALSE	10	TRUE	5	TRUE	TRUE	TRUE	FALSE	FALSE	FALSE	FALSE	FALSE	FALSE	TRUE	FALSE	FALSE	TRUE	FALSE	FALSE	TRUE	TRUE	FALSE	TRUE	FALSE	FALSE	FALSE	Both - in a separate space initially, then afterwards with them	Occasionally (more than once a year)	Low harm - little harm was caused to the patients	I don't know	TRUE	4	TRUE	TRUE
ENGLISH	Nurse	Junior clinician, junior manager or junior ward staff	TRUE	FALSE	FALSE	FALSE	FALSE	FALSE	FALSE			FALSE	TRUE	FALSE	FALSE	FALSE	5	TRUE	4	TRUE	TRUE	FALSE	FALSE	FALSE	TRUE	FALSE	FALSE	FALSE	TRUE	FALSE	FALSE	TRUE	FALSE	FALSE	FALSE	FALSE	FALSE	FALSE	FALSE	FALSE	FALSE	Sometimes - it varies	Occasionally (more than once a year)	Prefer not to answer	Low risk	TRUE	4	FALSE	FALSE
ENGLISH	Administrator or manager	Senior level medical or nursing or other clinical leader	FALSE	TRUE	FALSE	FALSE	FALSE	FALSE	FALSE		Saudi Arabia	FALSE	TRUE	FALSE	FALSE	FALSE	10	TRUE	4	FALSE	TRUE	FALSE	TRUE	FALSE	FALSE	FALSE	FALSE	FALSE	TRUE	FALSE	FALSE	FALSE	FALSE	TRUE	TRUE	FALSE	TRUE	FALSE	TRUE	TRUE	FALSE	Yes - always with them	Rarely (less than once a year)	Low harm - little harm was caused to the patients	Low risk	TRUE	4	FALSE	FALSE
ENGLISH	Nurse	Junior clinician, junior manager or junior ward staff	FALSE	TRUE	FALSE	FALSE	FALSE	FALSE	FALSE		China	TRUE	TRUE	TRUE	FALSE	FALSE	5	TRUE	4	FALSE	FALSE	TRUE	FALSE	FALSE	FALSE	FALSE	FALSE	FALSE	FALSE	TRUE	FALSE	FALSE	FALSE	FALSE	FALSE	FALSE	TRUE	FALSE	TRUE	FALSE	FALSE	Yes - always with them	Never (I have not experience this)	No patient safety incidents have occurred in my experience	Low risk	FALSE
ENGLISH	Nurse	Prefer not to answer	FALSE	FALSE	FALSE	FALSE	FALSE	FALSE	FALSE	Obstetrics in	China	FALSE	TRUE	FALSE	FALSE	FALSE	1	TRUE	4	TRUE	FALSE	FALSE	FALSE	TRUE	TRUE	FALSE	FALSE	FALSE	TRUE	TRUE	FALSE	FALSE	FALSE	FALSE	TRUE	FALSE	TRUE	FALSE	FALSE	FALSE	FALSE	I don't know	Occasionally (more than once a year)	No patient safety incidents have occurred in my experience	I don't know	FALSE
ENGLISH	Nurse	Junior clinician, junior manager or junior ward staff	TRUE	FALSE	FALSE	FALSE	FALSE	FALSE	FALSE		China	FALSE	TRUE	FALSE	FALSE	FALSE	5	FALSE																												FALSE
ENGLISH	Nurse	Middle grade clinician, middle manager or ward level leader	TRUE	FALSE	TRUE	TRUE	TRUE	FALSE	FALSE		China	FALSE	FALSE	FALSE	FALSE	TRUE	10	TRUE	4	FALSE	FALSE	TRUE	FALSE	TRUE	FALSE	FALSE	FALSE	FALSE	TRUE	FALSE	FALSE	TRUE	FALSE	TRUE	FALSE	FALSE	FALSE	FALSE	FALSE	FALSE	FALSE	Sometimes - it varies	I don't know	No patient safety incidents have occurred in my experience	Moderate risk	FALSE
ENGLISH	Nurse	Middle grade clinician, middle manager or ward level leader	FALSE	FALSE	FALSE	TRUE	FALSE	FALSE	FALSE		China	FALSE	TRUE	FALSE	FALSE	FALSE	5	TRUE	4	TRUE	FALSE	FALSE	FALSE	TRUE	TRUE	FALSE	FALSE	FALSE	FALSE	TRUE	FALSE	FALSE	FALSE	TRUE	TRUE	FALSE	TRUE	FALSE	TRUE	FALSE	FALSE	Both - in a separate space initially, then afterwards with them	Sometimes (more than once a month)	Moderate harm - the patients were harmed, but not severely	Moderate risk	TRUE	4	FALSE	TRUE
ENGLISH	Nurse	Junior clinician, junior manager or junior ward staff	TRUE	FALSE	FALSE	FALSE	FALSE	FALSE	FALSE		China	FALSE	TRUE	FALSE	FALSE	FALSE	1	FALSE																												FALSE
ENGLISH	Nurse	Junior clinician, junior manager or junior ward staff	FALSE	FALSE	TRUE	FALSE	FALSE	FALSE	FALSE		China	FALSE	TRUE	FALSE	FALSE	FALSE	0	TRUE	3	FALSE	FALSE	TRUE	FALSE	FALSE	FALSE	FALSE	FALSE	FALSE	FALSE	FALSE	FALSE	FALSE	FALSE	FALSE	FALSE	FALSE	TRUE	FALSE	FALSE	FALSE	FALSE	Yes - always with them	Never (I have not experience this)	Severe harm - they have caused Serious Incidents	Very high risk	TRUE	3	FALSE	FALSE
ENGLISH	Nurse	Senior level medical or nursing or other clinical leader	FALSE	TRUE	FALSE	FALSE	FALSE	FALSE	FALSE		China	FALSE	TRUE	FALSE	FALSE	FALSE	5	TRUE	3	TRUE	FALSE	FALSE	TRUE	FALSE	TRUE	FALSE	FALSE	FALSE	TRUE	FALSE	FALSE	FALSE	TRUE	FALSE	TRUE	FALSE	FALSE	FALSE	FALSE	FALSE	FALSE	Yes - always with them	Occasionally (more than once a year)	Low harm - little harm was caused to the patients	Low risk	TRUE	3	TRUE	FALSE
ENGLISH	Midwife	Junior clinician, junior manager or junior ward staff	TRUE	TRUE	TRUE	TRUE	TRUE	FALSE	FALSE		New Zealand	FALSE	TRUE	FALSE	FALSE	FALSE	5	TRUE	5	FALSE	TRUE	TRUE	TRUE	FALSE	FALSE	FALSE	FALSE	FALSE	TRUE	FALSE	FALSE	FALSE	FALSE	FALSE	TRUE	FALSE	FALSE	FALSE	FALSE	FALSE	FALSE	Prefer not to answer	Very often (every day)	No patient safety incidents have occurred in my experience	High risk	TRUE	5	FALSE	TRUE
ENGLISH	Nurse	Middle grade clinician, middle manager or ward level leader	FALSE	FALSE	FALSE	TRUE	FALSE	FALSE	FALSE		China	TRUE	TRUE	FALSE	FALSE	FALSE	15	TRUE	5	TRUE	FALSE	FALSE	TRUE	TRUE	TRUE	FALSE	FALSE	FALSE	TRUE	FALSE	FALSE	FALSE	FALSE	FALSE	FALSE	TRUE	TRUE	FALSE	TRUE	FALSE	FALSE	Yes - always with them	Occasionally (more than once a year)	Low harm - little harm was caused to the patients	Low risk	TRUE	4	FALSE	TRUE
ENGLISH	Nurse	Middle grade clinician, middle manager or ward level leader	FALSE	FALSE	TRUE	FALSE	FALSE	FALSE	FALSE		Saudi Arabia	FALSE	TRUE	FALSE	FALSE	FALSE	1	FALSE																												FALSE
ENGLISH	Nurse	Junior clinician, junior manager or junior ward staff	FALSE	FALSE	FALSE	TRUE	FALSE	FALSE	FALSE		China	FALSE	TRUE	FALSE	FALSE	FALSE	1	TRUE	4	FALSE	FALSE	FALSE	FALSE	FALSE	TRUE	FALSE	FALSE	FALSE	TRUE	TRUE	FALSE	FALSE	FALSE	FALSE	FALSE	FALSE	FALSE	FALSE	TRUE	FALSE	FALSE	Sometimes - it varies	Rarely (less than once a year)	Low harm - little harm was caused to the patients	Low risk	TRUE	3	FALSE	TRUE
ENGLISH	Paramedic or ambulance worker	Middle grade clinician, middle manager or ward level leader	FALSE	FALSE	TRUE	FALSE	FALSE	FALSE	FALSE		China	TRUE	TRUE	FALSE	FALSE	FALSE	15	TRUE	5	TRUE	TRUE	TRUE	TRUE	TRUE	TRUE	FALSE	FALSE	FALSE	TRUE	FALSE	FALSE	FALSE	FALSE	FALSE	TRUE	FALSE	FALSE	FALSE	TRUE	FALSE	FALSE	Yes - always with them	Sometimes (more than once a month)	No harm came to the patients	Very high risk	TRUE	5	TRUE	TRUE
ENGLISH	Nurse	Senior level medical or nursing or other clinical leader	TRUE	FALSE	FALSE	FALSE	FALSE	FALSE	FALSE		China	FALSE	TRUE	FALSE	FALSE	FALSE	10	TRUE	5	TRUE	TRUE	TRUE	FALSE	FALSE	TRUE	FALSE	FALSE	FALSE	TRUE	FALSE	FALSE	FALSE	FALSE	FALSE	FALSE	FALSE	FALSE	FALSE	FALSE	FALSE	FALSE	Yes - always with them	Sometimes (more than once a month)	Low harm - little harm was caused to the patients	Moderate risk	TRUE	4	TRUE	TRUE
ENGLISH	Nurse	Junior clinician, junior manager or junior ward staff	TRUE	FALSE	TRUE	TRUE	FALSE	FALSE	FALSE		China	TRUE	TRUE	FALSE	FALSE	FALSE	10	TRUE	4	FALSE	TRUE	TRUE	FALSE	FALSE	FALSE	FALSE	FALSE	FALSE	TRUE	FALSE	FALSE	FALSE	FALSE	FALSE	FALSE	FALSE	FALSE	TRUE	FALSE	FALSE	FALSE	Both - in a separate space initially, then afterwards with them	Occasionally (more than once a year)	Moderate harm - the patients were harmed, but not severely	Low risk	TRUE	4	FALSE	FALSE
ENGLISH	Nurse	Junior clinician, junior manager or junior ward staff	FALSE	TRUE	FALSE	FALSE	FALSE	FALSE	FALSE		China	TRUE	FALSE	FALSE	FALSE	FALSE	15	TRUE	4	FALSE	FALSE	TRUE	FALSE	FALSE	TRUE	FALSE	FALSE	FALSE	TRUE	FALSE	FALSE	TRUE	FALSE	FALSE	TRUE	FALSE	TRUE	FALSE	FALSE	TRUE	FALSE	Both - in a separate space initially, then afterwards with them	I don't know	No patient safety incidents have occurred in my experience	Prefer not to answer	TRUE	4	FALSE	FALSE
ENGLISH	Nurse	Junior clinician, junior manager or junior ward staff	FALSE	FALSE	FALSE	TRUE	FALSE	FALSE	FALSE		China	TRUE	FALSE	FALSE	FALSE	FALSE	1	TRUE	4	TRUE	FALSE	FALSE	TRUE	FALSE	FALSE	FALSE	FALSE	FALSE	TRUE	FALSE	TRUE	FALSE	FALSE	FALSE	TRUE	FALSE	TRUE	FALSE	FALSE	FALSE	FALSE	No - always in a separate place	Sometimes (more than once a month)	No patient safety incidents have occurred in my experience	No risk at all	TRUE	4	FALSE	FALSE
ENGLISH	Nurse	Senior level medical or nursing or other clinical leader	FALSE	FALSE	FALSE	FALSE	FALSE	FALSE	FALSE	OB		FALSE	FALSE	FALSE	TRUE	FALSE	15	TRUE	5	FALSE	FALSE	FALSE	TRUE	FALSE	FALSE	FALSE	FALSE	FALSE	TRUE	FALSE	FALSE	FALSE	FALSE	TRUE	FALSE	FALSE	TRUE	TRUE	TRUE	TRUE	FALSE	Yes - always with them	Rarely (less than once a year)	I don't know the outcome	Low risk	FALSE
ENGLISH	Midwife	Junior clinician, junior manager or junior ward staff	TRUE	TRUE	FALSE	FALSE	FALSE	TRUE	FALSE		China	FALSE	TRUE	FALSE	FALSE	FALSE	10	TRUE	5	TRUE	TRUE	TRUE	FALSE	FALSE	FALSE	FALSE	FALSE	FALSE	TRUE	FALSE	FALSE	TRUE	FALSE	FALSE	FALSE	FALSE	TRUE	FALSE	FALSE	FALSE	FALSE	Both - in a separate space initially, then afterwards with them	Rarely (less than once a year)	No harm came to the patients	Low risk	TRUE	5	TRUE	TRUE
ENGLISH	Nurse	Junior clinician, junior manager or junior ward staff	FALSE	FALSE	FALSE	TRUE	FALSE	FALSE	FALSE		China	FALSE	TRUE	FALSE	FALSE	FALSE	10	TRUE	5	FALSE	FALSE	TRUE	FALSE	FALSE	FALSE	FALSE	FALSE	FALSE	TRUE	FALSE	FALSE	FALSE	FALSE	FALSE	FALSE	FALSE	FALSE	FALSE	FALSE	FALSE	FALSE	Yes - always with them	Rarely (less than once a year)	Low harm - little harm was caused to the patients	Low risk	TRUE	4	FALSE	FALSE
ENGLISH	Administrator or manager	Junior clinician, junior manager or junior ward staff	FALSE	FALSE	FALSE	FALSE	TRUE	FALSE	FALSE		China	FALSE	TRUE	FALSE	FALSE	FALSE	15	FALSE																												FALSE
ENGLISH	Nurse	Junior clinician, junior manager or junior ward staff	FALSE	FALSE	FALSE	TRUE	FALSE	FALSE	FALSE		China	FALSE	TRUE	FALSE	FALSE	FALSE	1	TRUE	5	FALSE	TRUE	TRUE	TRUE	FALSE	FALSE	FALSE	FALSE	FALSE	FALSE	FALSE	TRUE	FALSE	FALSE	FALSE	FALSE	FALSE	FALSE	FALSE	FALSE	FALSE	FALSE	No - always in a separate place	Sometimes (more than once a month)	No harm came to the patients	Moderate risk	TRUE	5	TRUE	FALSE
ENGLISH	Nurse	Junior clinician, junior manager or junior ward staff	FALSE	FALSE	FALSE	TRUE	FALSE	FALSE	FALSE		China	FALSE	FALSE	FALSE	FALSE	TRUE	10	TRUE	5	FALSE	FALSE	FALSE	FALSE	FALSE	TRUE	FALSE	FALSE	FALSE	TRUE	FALSE	FALSE	FALSE	FALSE	FALSE	FALSE	FALSE	FALSE	FALSE	FALSE	FALSE	FALSE	Yes - always with them	Never (I have not experience this)	Severe harm - they have caused Serious Incidents	High risk	FALSE
ENGLISH	Nurse	Middle grade clinician, middle manager or ward level leader	TRUE	FALSE	TRUE	FALSE	FALSE	TRUE	FALSE		China	FALSE	TRUE	FALSE	FALSE	TRUE	10	TRUE	3	TRUE	TRUE	TRUE	TRUE	FALSE	FALSE	FALSE	FALSE	FALSE	TRUE	FALSE	FALSE	FALSE	FALSE	FALSE	FALSE	FALSE	TRUE	FALSE	FALSE	FALSE	FALSE	Yes - always with them	Rarely (less than once a year)	Low harm - little harm was caused to the patients	Low risk	TRUE	3	TRUE	TRUE
ENGLISH	Nurse	Junior clinician, junior manager or junior ward staff	FALSE	FALSE	FALSE	TRUE	FALSE	FALSE	FALSE		China	FALSE	TRUE	FALSE	FALSE	FALSE	10	FALSE																												TRUE	5	FALSE	FALSE
ENGLISH	Nurse	Junior clinician, junior manager or junior ward staff	TRUE	FALSE	FALSE	FALSE	FALSE	FALSE	FALSE		China	FALSE	TRUE	FALSE	FALSE	FALSE	10	TRUE	5	TRUE	TRUE	TRUE	FALSE	TRUE	TRUE	FALSE	FALSE	FALSE	TRUE	TRUE	FALSE	FALSE	FALSE	FALSE	FALSE	FALSE	FALSE	FALSE	FALSE	FALSE	FALSE	No - always in a separate place	Often (more than once a week)	No harm came to the patients	Low risk	TRUE	5	FALSE	FALSE
ENGLISH	Nurse	Junior clinician, junior manager or junior ward staff	FALSE	FALSE	FALSE	TRUE	FALSE	FALSE	FALSE		China	FALSE	FALSE	FALSE	FALSE	TRUE	5	TRUE	4	FALSE	TRUE	FALSE	FALSE	FALSE	FALSE	FALSE	FALSE	FALSE	TRUE	FALSE	FALSE	TRUE	FALSE	TRUE	FALSE	FALSE	FALSE	FALSE	FALSE	FALSE	FALSE	Yes - always with them	Never (I have not experience this)	No patient safety incidents have occurred in my experience	Low risk	FALSE
ENGLISH	Nurse	Middle grade clinician, middle manager or ward level leader	FALSE	FALSE	FALSE	TRUE	FALSE	FALSE	FALSE		China	FALSE	FALSE	FALSE	TRUE	FALSE	10	TRUE	5	FALSE	FALSE	FALSE	FALSE	FALSE	FALSE	TRUE	FALSE	FALSE	FALSE	FALSE	FALSE	FALSE	FALSE	FALSE	FALSE	FALSE	TRUE	FALSE	FALSE	FALSE	FALSE	No - always in a separate place	Rarely (less than once a year)	I don't know the outcome	No risk at all	FALSE
ENGLISH	Nurse	Senior level medical or nursing or other clinical leader	TRUE	FALSE	FALSE	TRUE	FALSE	FALSE	FALSE		China	FALSE	TRUE	FALSE	FALSE	FALSE	10	FALSE																												FALSE
ENGLISH	Nurse	Prefer not to answer	TRUE	FALSE	FALSE	FALSE	FALSE	FALSE	FALSE		China	FALSE	TRUE	FALSE	FALSE	FALSE	1	TRUE	5	FALSE	FALSE	FALSE	FALSE	FALSE	TRUE	FALSE	FALSE	FALSE	TRUE	FALSE	FALSE	FALSE	FALSE	FALSE	FALSE	FALSE	FALSE	FALSE	FALSE	FALSE	FALSE	Yes - always with them	I don't know	No patient safety incidents have occurred in my experience	No risk at all	FALSE
ENGLISH	Nurse	Junior clinician, junior manager or junior ward staff	FALSE	FALSE	FALSE	TRUE	FALSE	FALSE	FALSE		China	FALSE	TRUE	FALSE	FALSE	FALSE	5	TRUE	5	FALSE	TRUE	TRUE	TRUE	FALSE	FALSE	FALSE	FALSE	FALSE	TRUE	FALSE	FALSE	FALSE	FALSE	TRUE	FALSE	FALSE	FALSE	FALSE	FALSE	FALSE	FALSE	Yes - always with them	Sometimes (more than once a month)	No patient safety incidents have occurred in my experience	I don't know	TRUE	5	FALSE	TRUE
ENGLISH	Nurse	Senior level medical or nursing or other clinical leader	TRUE	TRUE	FALSE	FALSE	TRUE	FALSE	FALSE		China	FALSE	TRUE	FALSE	FALSE	FALSE	1	TRUE	5	FALSE	TRUE	TRUE	TRUE	TRUE	TRUE	FALSE	FALSE	FALSE	TRUE	FALSE	FALSE	FALSE	FALSE	FALSE	FALSE	FALSE	FALSE	FALSE	FALSE	FALSE	FALSE	Yes - always with them	Rarely (less than once a year)	Prefer not to answer	Moderate risk	FALSE
ENGLISH	Nurse	Middle grade clinician, middle manager or ward level leader	TRUE	FALSE	FALSE	FALSE	FALSE	FALSE	FALSE		China	TRUE	FALSE	FALSE	FALSE	FALSE	1	TRUE	5	TRUE	TRUE	TRUE	TRUE	TRUE	TRUE	FALSE	FALSE	FALSE	TRUE	TRUE	TRUE	TRUE	TRUE	TRUE	TRUE	TRUE	TRUE	TRUE	TRUE	TRUE	FALSE	Yes - always with them	Never (I have not experience this)	No harm came to the patients	Low risk	TRUE	5	FALSE	FALSE
ENGLISH	Nurse	Junior clinician, junior manager or junior ward staff	FALSE	FALSE	FALSE	TRUE	FALSE	FALSE	FALSE		China	FALSE	TRUE	FALSE	FALSE	FALSE	5	TRUE	5	FALSE	FALSE	FALSE	FALSE	FALSE	FALSE	TRUE	FALSE	FALSE	FALSE	FALSE	FALSE	FALSE	FALSE	FALSE	FALSE	FALSE	FALSE	FALSE	FALSE	FALSE	FALSE	No - always in a separate place	Never (I have not experience this)	No patient safety incidents have occurred in my experience	I don't know	FALSE
ENGLISH	Nurse	Junior clinician, junior manager or junior ward staff	TRUE	TRUE	FALSE	FALSE	TRUE	TRUE	FALSE		China	TRUE	TRUE	TRUE	FALSE	FALSE	10	TRUE	5	FALSE	FALSE	TRUE	TRUE	FALSE	TRUE	FALSE	FALSE	FALSE	TRUE	FALSE	TRUE	FALSE	FALSE	FALSE	FALSE	FALSE	FALSE	FALSE	FALSE	FALSE	FALSE	No - always in a separate place	Rarely (less than once a year)	No patient safety incidents have occurred in my experience	I don't know	TRUE	5	FALSE	FALSE
ENGLISH	Nurse	Middle grade clinician, middle manager or ward level leader	TRUE	FALSE	FALSE	FALSE	FALSE	FALSE	FALSE		China	TRUE	FALSE	FALSE	FALSE	FALSE	1	TRUE	5	TRUE	TRUE	TRUE	TRUE	TRUE	TRUE	FALSE	FALSE	FALSE	TRUE	TRUE	TRUE	TRUE	TRUE	TRUE	TRUE	TRUE	TRUE	TRUE	TRUE	TRUE	FALSE	Yes - always with them	Never (I have not experience this)	No harm came to the patients	Low risk	TRUE	5	FALSE	FALSE
ENGLISH	Nurse	Junior clinician, junior manager or junior ward staff	TRUE	FALSE	FALSE	FALSE	FALSE	FALSE	FALSE		China	FALSE	TRUE	FALSE	FALSE	FALSE	1	TRUE	4	TRUE	TRUE	TRUE	FALSE	FALSE	TRUE	FALSE	FALSE	FALSE	TRUE	TRUE	TRUE	TRUE	TRUE	TRUE	FALSE	FALSE	FALSE	FALSE	FALSE	FALSE	FALSE	I don't know	Never (I have not experience this)	No patient safety incidents have occurred in my experience	Low risk	FALSE
ENGLISH	Nurse	Senior level medical or nursing or other clinical leader	TRUE	FALSE	FALSE	TRUE	TRUE	TRUE	FALSE		China	FALSE	TRUE	FALSE	FALSE	FALSE	15	TRUE	3	FALSE	FALSE	FALSE	TRUE	TRUE	FALSE	FALSE	FALSE	FALSE	FALSE	FALSE	FALSE	FALSE	FALSE	TRUE	FALSE	FALSE	FALSE	FALSE	FALSE	FALSE	FALSE	Yes - always with them	Occasionally (more than once a year)	No harm came to the patients	Low risk	TRUE	3	FALSE	FALSE
ENGLISH	Nurse	Middle grade clinician, middle manager or ward level leader	TRUE	FALSE	FALSE	TRUE	FALSE	FALSE	FALSE		China	FALSE	TRUE	FALSE	FALSE	FALSE	15	TRUE	4	FALSE	FALSE	FALSE	TRUE	TRUE	FALSE	FALSE	FALSE	FALSE	TRUE	FALSE	FALSE	FALSE	FALSE	TRUE	TRUE	FALSE	TRUE	TRUE	TRUE	FALSE	FALSE	Both - in a separate space initially, then afterwards with them	Occasionally (more than once a year)	Severe harm - they have caused Serious Incidents	Moderate risk	TRUE	2	FALSE	FALSE
ENGLISH	Nurse	Junior clinician, junior manager or junior ward staff	FALSE	FALSE	TRUE	FALSE	FALSE	FALSE	FALSE		China	FALSE	TRUE	FALSE	FALSE	FALSE	10	TRUE	5	TRUE	TRUE	TRUE	TRUE	TRUE	TRUE	FALSE	FALSE	FALSE	TRUE	TRUE	TRUE	TRUE	TRUE	TRUE	TRUE	TRUE	TRUE	TRUE	TRUE	TRUE	FALSE	Sometimes - it varies	Never (I have not experience this)	No patient safety incidents have occurred in my experience	Low risk	TRUE	5	TRUE	TRUE
ENGLISH	Nurse	Senior level medical or nursing or other clinical leader	FALSE	TRUE	FALSE	TRUE	TRUE	FALSE	FALSE		China	TRUE	TRUE	FALSE	FALSE	FALSE	15	TRUE	4	TRUE	TRUE	TRUE	TRUE	TRUE	TRUE	FALSE	FALSE	FALSE	TRUE	FALSE	FALSE	FALSE	FALSE	TRUE	TRUE	TRUE	TRUE	TRUE	TRUE	TRUE	FALSE	Sometimes - it varies	Occasionally (more than once a year)	No harm came to the patients	Low risk	TRUE	4	TRUE	TRUE
ENGLISH	Nurse	Senior level medical or nursing or other clinical leader	TRUE	FALSE	FALSE	FALSE	FALSE	FALSE	FALSE		China	TRUE	FALSE	FALSE	FALSE	FALSE	10	TRUE	5	FALSE	FALSE	FALSE	TRUE	FALSE	TRUE	FALSE	FALSE	FALSE	TRUE	FALSE	FALSE	FALSE	FALSE	FALSE	FALSE	FALSE	FALSE	FALSE	FALSE	FALSE	FALSE	Yes - always with them	Rarely (less than once a year)	Low harm - little harm was caused to the patients	High risk	TRUE	4	FALSE	TRUE
ENGLISH	Nurse	Prefer not to answer	FALSE	FALSE	FALSE	FALSE	FALSE	FALSE	TRUE		China	FALSE	FALSE	FALSE	TRUE	FALSE	5	TRUE	3	FALSE	FALSE	TRUE	TRUE	FALSE	FALSE	FALSE	FALSE	FALSE	FALSE	FALSE	FALSE	FALSE	FALSE	FALSE	FALSE	FALSE	FALSE	FALSE	FALSE	FALSE	FALSE	I don't know	I don't know	Prefer not to answer	I don't know	FALSE
ENGLISH	Nurse	Senior level medical or nursing or other clinical leader	TRUE	FALSE	FALSE	FALSE	FALSE	FALSE	FALSE		Oman	TRUE	FALSE	FALSE	FALSE	TRUE	15	TRUE	3	TRUE	FALSE	TRUE	TRUE	FALSE	TRUE	FALSE	FALSE	FALSE	TRUE	FALSE	FALSE	TRUE	FALSE	FALSE	FALSE	TRUE	FALSE	TRUE	FALSE	FALSE	FALSE	Yes - always with them	Occasionally (more than once a year)	Severe harm - they have caused Serious Incidents	High risk	FALSE
ENGLISH	Nurse	Junior clinician, junior manager or junior ward staff	FALSE	TRUE	TRUE	TRUE	TRUE	FALSE	FALSE		Canada	TRUE	TRUE	FALSE	FALSE	FALSE	10	TRUE	3	TRUE	TRUE	TRUE	TRUE	TRUE	FALSE	FALSE	FALSE	FALSE	TRUE	FALSE	TRUE	FALSE	FALSE	TRUE	TRUE	FALSE	TRUE	FALSE	FALSE	FALSE	FALSE	Both - in a separate space initially, then afterwards with them	Very often (every day)	Moderate harm - the patients were harmed, but not severely	Moderate risk	TRUE	3	FALSE	TRUE
ENGLISH	Nurse	Junior clinician, junior manager or junior ward staff	TRUE	FALSE	FALSE	FALSE	FALSE	FALSE	FALSE		China	FALSE	TRUE	FALSE	FALSE	FALSE	15	TRUE	5	TRUE	FALSE	FALSE	FALSE	FALSE	FALSE	FALSE	FALSE	FALSE	TRUE	FALSE	FALSE	FALSE	FALSE	FALSE	FALSE	FALSE	FALSE	FALSE	TRUE	FALSE	FALSE	Yes - always with them	Never (I have not experience this)	No patient safety incidents have occurred in my experience	I don't know	FALSE
ENGLISH	Nurse	Junior clinician, junior manager or junior ward staff	TRUE	FALSE	FALSE	FALSE	FALSE	FALSE	FALSE		China	FALSE	FALSE	FALSE	TRUE	FALSE	15	TRUE	5	TRUE	FALSE	FALSE	TRUE	FALSE	FALSE	FALSE	FALSE	FALSE	TRUE	FALSE	FALSE	FALSE	FALSE	FALSE	FALSE	FALSE	FALSE	FALSE	FALSE	FALSE	FALSE	Yes - always with them	Occasionally (more than once a year)	No harm came to the patients	Low risk	TRUE	5	TRUE	TRUE
ENGLISH	Nurse	Junior clinician, junior manager or junior ward staff	TRUE	FALSE	FALSE	FALSE	FALSE	FALSE	FALSE		Saudi Arabia	FALSE	TRUE	FALSE	FALSE	FALSE	5	TRUE	5	FALSE	FALSE	FALSE	TRUE	FALSE	FALSE	FALSE	FALSE	FALSE	TRUE	TRUE	FALSE	FALSE	FALSE	FALSE	FALSE	FALSE	FALSE	FALSE	FALSE	FALSE	FALSE	Yes - always with them	Never (I have not experience this)	Severe harm - they have caused Serious Incidents	Very high risk	TRUE	5	FALSE	FALSE
ENGLISH	Administrator or manager	Senior level medical or nursing or other clinical leader	FALSE	FALSE	FALSE	FALSE	FALSE	FALSE	FALSE	entitle OPD & ER		FALSE	TRUE	FALSE	FALSE	FALSE	15	FALSE																												TRUE	4	FALSE	FALSE
ENGLISH	Nurse	Middle grade clinician, middle manager or ward level leader	FALSE	FALSE	TRUE	FALSE	FALSE	FALSE	FALSE			FALSE	TRUE	FALSE	FALSE	FALSE	15	TRUE	4	TRUE	TRUE	FALSE	TRUE	FALSE	TRUE	FALSE	FALSE	FALSE	FALSE	FALSE	FALSE	TRUE	FALSE	FALSE	FALSE	FALSE	TRUE	FALSE	FALSE	FALSE	FALSE	Sometimes - it varies	Rarely (less than once a year)	No harm came to the patients	Moderate risk	TRUE	4	TRUE	TRUE
ENGLISH	Nurse	Middle grade clinician, middle manager or ward level leader	TRUE	TRUE	TRUE	FALSE	TRUE	TRUE	FALSE		China	TRUE	TRUE	TRUE	FALSE	FALSE	15	TRUE	5	FALSE	TRUE	TRUE	TRUE	TRUE	TRUE	FALSE	FALSE	FALSE	TRUE	TRUE	FALSE	TRUE	TRUE	TRUE	FALSE	FALSE	FALSE	TRUE	TRUE	TRUE	FALSE	Sometimes - it varies	Often (more than once a week)	No harm came to the patients	I don't know	TRUE	5	FALSE	TRUE
ENGLISH	Nurse	Middle grade clinician, middle manager or ward level leader	TRUE	FALSE	FALSE	FALSE	FALSE	FALSE	FALSE		Saudi Arabia	TRUE	FALSE	FALSE	FALSE	FALSE	15	TRUE	5	TRUE	FALSE	FALSE	FALSE	FALSE	FALSE	FALSE	FALSE	FALSE	FALSE	TRUE	FALSE	FALSE	FALSE	FALSE	FALSE	FALSE	FALSE	FALSE	FALSE	FALSE	FALSE	Both - in a separate space initially, then afterwards with them	Occasionally (more than once a year)	Low harm - little harm was caused to the patients	Low risk	FALSE
ENGLISH	Administrator or manager	Senior level medical or nursing or other clinical leader	FALSE	FALSE	FALSE	TRUE	FALSE	FALSE	FALSE			FALSE	TRUE	FALSE	FALSE	FALSE	15	TRUE	5	TRUE	FALSE	FALSE	TRUE	TRUE	TRUE	FALSE	FALSE	FALSE	TRUE	FALSE	FALSE	FALSE	FALSE	FALSE	FALSE	FALSE	FALSE	FALSE	FALSE	FALSE	FALSE	Never - we use online or phone-based systems	Rarely (less than once a year)	No patient safety incidents have occurred in my experience	High risk	TRUE	3	FALSE	FALSE
ENGLISH	Midwife	Junior clinician, junior manager or junior ward staff	FALSE	TRUE	FALSE	TRUE	FALSE	FALSE	FALSE		China	FALSE	TRUE	FALSE	FALSE	FALSE	5	TRUE	5	TRUE	FALSE	FALSE	FALSE	FALSE	TRUE	FALSE	FALSE	FALSE	FALSE	FALSE	FALSE	FALSE	FALSE	FALSE	FALSE	FALSE	TRUE	FALSE	FALSE	FALSE	FALSE	Prefer not to answer	Sometimes (more than once a month)	Prefer not to answer	Very high risk	TRUE	5	FALSE	FALSE
ENGLISH	Midwife	Senior level medical or nursing or other clinical leader	FALSE	FALSE	FALSE	TRUE	FALSE	FALSE	FALSE		China	TRUE	FALSE	FALSE	FALSE	FALSE	15	TRUE	3	FALSE	TRUE	TRUE	TRUE	FALSE	TRUE	FALSE	FALSE	FALSE	TRUE	FALSE	FALSE	FALSE	FALSE	FALSE	FALSE	FALSE	FALSE	FALSE	FALSE	FALSE	FALSE	Yes - always with them	Occasionally (more than once a year)	No harm came to the patients	Low risk	TRUE	4	FALSE	FALSE
ENGLISH	Doctor	Middle grade clinician, middle manager or ward level leader	FALSE	TRUE	FALSE	TRUE	FALSE	FALSE	FALSE		China	TRUE	FALSE	FALSE	FALSE	FALSE	15	TRUE	5	FALSE	TRUE	FALSE	FALSE	FALSE	FALSE	FALSE	FALSE	FALSE	TRUE	FALSE	FALSE	FALSE	FALSE	FALSE	TRUE	FALSE	TRUE	TRUE	FALSE	FALSE	FALSE	Both - in a separate space initially, then afterwards with them	Occasionally (more than once a year)	Severe harm - they have caused Serious Incidents	Low risk	FALSE
ENGLISH	Nurse	Senior level medical or nursing or other clinical leader	TRUE	FALSE	FALSE	TRUE	FALSE	TRUE	FALSE		China	TRUE	TRUE	FALSE	FALSE	FALSE	10	TRUE	5	TRUE	TRUE	FALSE	TRUE	TRUE	TRUE	FALSE	FALSE	FALSE	FALSE	FALSE	FALSE	FALSE	FALSE	FALSE	TRUE	FALSE	TRUE	FALSE	FALSE	FALSE	FALSE	Both - in a separate space initially, then afterwards with them	Sometimes (more than once a month)	Low harm - little harm was caused to the patients	Low risk	TRUE	4	FALSE	TRUE
ENGLISH	Nurse	Junior clinician, junior manager or junior ward staff	TRUE	FALSE	FALSE	FALSE	FALSE	FALSE	FALSE		China	FALSE	TRUE	FALSE	FALSE	FALSE	15	TRUE	5	FALSE	FALSE	FALSE	TRUE	FALSE	FALSE	FALSE	FALSE	FALSE	FALSE	FALSE	FALSE	FALSE	FALSE	FALSE	FALSE	FALSE	TRUE	FALSE	FALSE	FALSE	FALSE	Yes - always with them	Sometimes (more than once a month)	Low harm - little harm was caused to the patients	Moderate risk	TRUE	5	FALSE	FALSE
ENGLISH	Nurse	Middle grade clinician, middle manager or ward level leader	TRUE	FALSE	FALSE	FALSE	FALSE	FALSE	FALSE			FALSE	TRUE	FALSE	FALSE	FALSE	15	TRUE	4	FALSE	FALSE	FALSE	TRUE	FALSE	FALSE	FALSE	FALSE	FALSE	TRUE	FALSE	FALSE	FALSE	FALSE	FALSE	FALSE	FALSE	TRUE	FALSE	FALSE	FALSE	FALSE	Yes - always with them	Occasionally (more than once a year)	Moderate harm - the patients were harmed, but not severely	Low risk	TRUE	5	FALSE	FALSE
ENGLISH	Nurse	Junior clinician, junior manager or junior ward staff	FALSE	FALSE	FALSE	TRUE	FALSE	FALSE	FALSE		China	FALSE	TRUE	FALSE	FALSE	FALSE	5	TRUE	4	TRUE	FALSE	FALSE	FALSE	FALSE	FALSE	FALSE	FALSE	FALSE	TRUE	FALSE	FALSE	FALSE	FALSE	FALSE	FALSE	FALSE	FALSE	FALSE	FALSE	FALSE	FALSE	Both - in a separate space initially, then afterwards with them	Rarely (less than once a year)	Prefer not to answer	I don't know	TRUE	3	TRUE	FALSE
ENGLISH	Nurse	Senior level medical or nursing or other clinical leader	FALSE	FALSE	FALSE	TRUE	FALSE	FALSE	FALSE		China	FALSE	TRUE	FALSE	FALSE	FALSE	5	TRUE	4	FALSE	FALSE	FALSE	FALSE	FALSE	FALSE	FALSE	TRUE	FALSE	TRUE	FALSE	FALSE	FALSE	FALSE	FALSE	FALSE	FALSE	FALSE	FALSE	FALSE	FALSE	FALSE	Prefer not to answer	Prefer not to answer	No patient safety incidents have occurred in my experience	Prefer not to answer	FALSE
ENGLISH	Nurse	Senior level medical or nursing or other clinical leader	FALSE	TRUE	FALSE	FALSE	FALSE	FALSE	FALSE		Saudi Arabia	TRUE	TRUE	FALSE	FALSE	FALSE	10	TRUE	5	TRUE	TRUE	TRUE	TRUE	TRUE	TRUE	FALSE	FALSE	FALSE	TRUE	FALSE	FALSE	FALSE	FALSE	FALSE	TRUE	FALSE	TRUE	FALSE	FALSE	FALSE	FALSE	Both - in a separate space initially, then afterwards with them	Prefer not to answer	Prefer not to answer	Very high risk	TRUE	5	TRUE	TRUE
ENGLISH	Nurse	Junior clinician, junior manager or junior ward staff	FALSE	FALSE	FALSE	TRUE	FALSE	FALSE	FALSE		China	FALSE	TRUE	FALSE	FALSE	FALSE	5	TRUE	5	TRUE	TRUE	TRUE	TRUE	FALSE	FALSE	FALSE	FALSE	FALSE	TRUE	FALSE	FALSE	FALSE	FALSE	FALSE	FALSE	FALSE	FALSE	FALSE	FALSE	FALSE	FALSE	Yes - always with them	Occasionally (more than once a year)	Severe harm - they have caused Serious Incidents	Very high risk	TRUE	5	TRUE	TRUE
ENGLISH	Pharmacist	Senior level medical or nursing or other clinical leader	FALSE	FALSE	TRUE	FALSE	FALSE	FALSE	FALSE		United Kingdom	FALSE	TRUE	FALSE	FALSE	FALSE	15	FALSE																												FALSE
ENGLISH	Administrator or manager	Middle grade clinician, middle manager or ward level leader	FALSE	FALSE	FALSE	FALSE	FALSE	FALSE	FALSE	clinical practice OPD	China	FALSE	FALSE	FALSE	TRUE	FALSE	15	TRUE	4	TRUE	TRUE	FALSE	TRUE	TRUE	TRUE	FALSE	FALSE	FALSE	TRUE	FALSE	FALSE	TRUE	FALSE	FALSE	FALSE	FALSE	TRUE	TRUE	TRUE	FALSE	FALSE	Both - in a separate space initially, then afterwards with them	Rarely (less than once a year)	No patient safety incidents have occurred in my experience	Low risk	FALSE
ENGLISH	Nurse	Senior level medical or nursing or other clinical leader	FALSE	FALSE	FALSE	TRUE	FALSE	FALSE	FALSE		China	TRUE	TRUE	FALSE	FALSE	FALSE	15	TRUE	3	FALSE	FALSE	FALSE	TRUE	TRUE	TRUE	FALSE	FALSE	FALSE	FALSE	TRUE	FALSE	FALSE	FALSE	FALSE	FALSE	FALSE	TRUE	FALSE	FALSE	FALSE	FALSE	Both - in a separate space initially, then afterwards with them	Occasionally (more than once a year)	Low harm - little harm was caused to the patients	Low risk	TRUE	4	FALSE	FALSE
ENGLISH	Nurse	just join into ufh	FALSE	FALSE	FALSE	TRUE	FALSE	FALSE	FALSE		Australia	TRUE	FALSE	FALSE	FALSE	FALSE	10	TRUE	5	FALSE	FALSE	FALSE	TRUE	FALSE	FALSE	FALSE	FALSE	FALSE	FALSE	FALSE	FALSE	FALSE	FALSE	FALSE	FALSE	FALSE	FALSE	FALSE	FALSE	FALSE	TRUE	No - always in a separate place	I don't know	No harm came to the patients	I don't know	TRUE	5	TRUE	FALSE
ENGLISH	Nurse	Prefer not to answer	TRUE	FALSE	FALSE	FALSE	FALSE	FALSE	FALSE			FALSE	TRUE	FALSE	FALSE	FALSE	1	TRUE	5	TRUE	TRUE	TRUE	TRUE	TRUE	TRUE	FALSE	FALSE	FALSE	TRUE	TRUE	TRUE	FALSE	TRUE	TRUE	TRUE	FALSE	TRUE	TRUE	TRUE	FALSE	FALSE	Yes - always with them	Rarely (less than once a year)	No patient safety incidents have occurred in my experience	Very high risk	FALSE
ENGLISH	Nurse	Junior clinician, junior manager or junior ward staff	TRUE	FALSE	FALSE	FALSE	FALSE	FALSE	FALSE		China	FALSE	TRUE	FALSE	FALSE	FALSE	5	TRUE	5	FALSE	FALSE	FALSE	TRUE	FALSE	FALSE	FALSE	FALSE	FALSE	FALSE	FALSE	FALSE	FALSE	FALSE	TRUE	FALSE	FALSE	FALSE	FALSE	FALSE	FALSE	FALSE	Sometimes - it varies	Rarely (less than once a year)	Low harm - little harm was caused to the patients	Low risk	FALSE
ENGLISH	Nurse	Prefer not to answer	TRUE	FALSE	FALSE	FALSE	FALSE	FALSE	FALSE		China	FALSE	TRUE	FALSE	FALSE	FALSE	15	TRUE	5	TRUE	FALSE	FALSE	FALSE	FALSE	FALSE	FALSE	FALSE	FALSE	TRUE	TRUE	FALSE	FALSE	FALSE	FALSE	FALSE	FALSE	FALSE	FALSE	FALSE	FALSE	FALSE	Yes - always with them	Never (I have not experience this)	No patient safety incidents have occurred in my experience	Low risk	TRUE	5	TRUE	TRUE
ENGLISH	Nurse	Middle grade clinician, middle manager or ward level leader	TRUE	FALSE	FALSE	TRUE	FALSE	FALSE	FALSE			FALSE	TRUE	FALSE	FALSE	FALSE	15	TRUE	5	FALSE	FALSE	FALSE	FALSE	FALSE	TRUE	FALSE	FALSE	FALSE	TRUE	FALSE	FALSE	FALSE	FALSE	FALSE	FALSE	FALSE	FALSE	FALSE	FALSE	FALSE	FALSE	Yes - always with them	Occasionally (more than once a year)	No harm came to the patients	Low risk	TRUE	4	FALSE	FALSE
ENGLISH	Nurse	Senior level medical or nursing or other clinical leader	TRUE	FALSE	FALSE	FALSE	FALSE	FALSE	FALSE			FALSE	TRUE	FALSE	FALSE	FALSE	10	TRUE	5	FALSE	TRUE	TRUE	TRUE	TRUE	TRUE	FALSE	FALSE	FALSE	TRUE	TRUE	TRUE	TRUE	TRUE	TRUE	TRUE	FALSE	TRUE	TRUE	TRUE	FALSE	FALSE	Yes - always with them	Rarely (less than once a year)	Low harm - little harm was caused to the patients	Low risk	TRUE	4	FALSE	FALSE
ENGLISH	Doctor	Middle grade clinician, middle manager or ward level leader	TRUE	FALSE	FALSE	FALSE	FALSE	FALSE	FALSE		China	FALSE	TRUE	FALSE	FALSE	FALSE	10	TRUE	4	FALSE	FALSE	FALSE	TRUE	FALSE	FALSE	FALSE	FALSE	FALSE	TRUE	FALSE	FALSE	FALSE	FALSE	FALSE	TRUE	FALSE	FALSE	FALSE	FALSE	FALSE	FALSE	No - always in a separate place	Occasionally (more than once a year)	Low harm - little harm was caused to the patients	Low risk	TRUE	3	TRUE	FALSE
ENGLISH	Nurse	Prefer not to answer	TRUE	FALSE	FALSE	FALSE	FALSE	FALSE	FALSE			FALSE	TRUE	FALSE	FALSE	FALSE	1	TRUE	5	FALSE	TRUE	TRUE	TRUE	FALSE	FALSE	FALSE	FALSE	FALSE	TRUE	TRUE	TRUE	TRUE	TRUE	TRUE	TRUE	FALSE	TRUE	TRUE	TRUE	FALSE	FALSE	Yes - always with them	Never (I have not experience this)	Low harm - little harm was caused to the patients	Low risk	TRUE	4	TRUE	TRUE
ENGLISH	Nurse	Senior manager or leader (e.g. CEO, COO)	TRUE	FALSE	FALSE	FALSE	FALSE	FALSE	FALSE			TRUE	TRUE	FALSE	FALSE	FALSE	1	TRUE	5										TRUE	FALSE	FALSE	FALSE	FALSE	FALSE	FALSE	FALSE	FALSE	FALSE	FALSE	FALSE	FALSE	Both - in a separate space initially, then afterwards with them	Often (more than once a week)	Moderate harm - the patients were harmed, but not severely	High risk	TRUE	5	FALSE	FALSE
ENGLISH	Doctor	Prefer not to answer	FALSE	FALSE	FALSE	TRUE	FALSE	FALSE	FALSE		China	TRUE	FALSE	FALSE	FALSE	FALSE	1	TRUE	5	TRUE	FALSE	FALSE	FALSE	FALSE	FALSE	FALSE	FALSE	FALSE	TRUE	FALSE	FALSE	FALSE	FALSE	FALSE	FALSE	FALSE	FALSE	FALSE	FALSE	FALSE	FALSE	Yes - always with them	Very often (every day)	Severe harm - they have caused Serious Incidents	Moderate risk	TRUE	5	TRUE	TRUE
ENGLISH	Nurse	Senior level medical or nursing or other clinical leader	FALSE	FALSE	FALSE	TRUE	FALSE	FALSE	FALSE		China	FALSE	TRUE	FALSE	FALSE	FALSE	10	TRUE	4	TRUE	TRUE	TRUE	TRUE	TRUE	TRUE	FALSE	FALSE	FALSE	TRUE	FALSE	TRUE	FALSE	FALSE	FALSE	FALSE	FALSE	FALSE	FALSE	FALSE	FALSE	FALSE	Both - in a separate space initially, then afterwards with them	Rarely (less than once a year)	Low harm - little harm was caused to the patients	Low risk	TRUE	4	TRUE	TRUE
ENGLISH	Nurse	Senior level medical or nursing or other clinical leader	TRUE	FALSE	FALSE	FALSE	FALSE	FALSE	FALSE		China	FALSE	TRUE	FALSE	FALSE	FALSE	5	TRUE	2	TRUE	TRUE	FALSE	TRUE	TRUE	TRUE	FALSE	FALSE	FALSE	FALSE	FALSE	FALSE	FALSE	FALSE	FALSE	TRUE	FALSE	TRUE	FALSE	TRUE	TRUE	FALSE	I don't know	Very often (every day)	No harm came to the patients	High risk	TRUE	3	FALSE	FALSE
ENGLISH	Nurse	Senior level medical or nursing or other clinical leader	FALSE	FALSE	TRUE	TRUE	FALSE	FALSE	FALSE		China	FALSE	TRUE	FALSE	FALSE	FALSE	5	TRUE	5	FALSE	FALSE	TRUE	FALSE	FALSE	FALSE	FALSE	FALSE	FALSE	TRUE	FALSE	FALSE	FALSE	FALSE	TRUE	TRUE	FALSE	TRUE	TRUE	TRUE	TRUE	FALSE	I don't know	Rarely (less than once a year)	No patient safety incidents have occurred in my experience	Very high risk	TRUE	4	TRUE	FALSE
ENGLISH	Doctor	Senior level medical or nursing or other clinical leader	TRUE	FALSE	FALSE	FALSE	FALSE	FALSE	FALSE			FALSE	FALSE	FALSE	FALSE	TRUE	15	TRUE	5	FALSE	FALSE	FALSE	FALSE	FALSE	FALSE	TRUE	FALSE	FALSE	FALSE	FALSE	FALSE	FALSE	FALSE	FALSE	FALSE	FALSE	FALSE	TRUE	FALSE	FALSE	FALSE	I don't know	I don't know	Prefer not to answer	I don't know	TRUE	5	FALSE	FALSE
ENGLISH	Nurse	Junior clinician, junior manager or junior ward staff	TRUE	TRUE	FALSE	FALSE	FALSE	FALSE	FALSE		China	FALSE	TRUE	FALSE	FALSE	FALSE	5	TRUE	5	TRUE	TRUE	TRUE	FALSE	FALSE	FALSE	FALSE	FALSE	FALSE	TRUE	TRUE	FALSE	FALSE	FALSE	FALSE	FALSE	FALSE	TRUE	FALSE	TRUE	FALSE	FALSE	Both - in a separate space initially, then afterwards with them	Never (I have not experience this)	No patient safety incidents have occurred in my experience	Low risk	FALSE
ENGLISH	Nurse	Junior clinician, junior manager or junior ward staff	FALSE	FALSE	FALSE	TRUE	FALSE	FALSE	FALSE		China	FALSE	TRUE	FALSE	FALSE	FALSE	10	FALSE																												FALSE
ENGLISH	Doctor	Senior level medical or nursing or other clinical leader	FALSE	TRUE	TRUE	FALSE	FALSE	FALSE	FALSE		United Kingdom	TRUE	FALSE	FALSE	FALSE	FALSE	15	TRUE	3	TRUE	TRUE	TRUE	TRUE	TRUE	TRUE	FALSE	FALSE	FALSE	TRUE	TRUE	FALSE	TRUE	TRUE	TRUE	FALSE	FALSE	TRUE	TRUE	TRUE	TRUE	FALSE	Both - in a separate space initially, then afterwards with them	Sometimes (more than once a month)	Low harm - little harm was caused to the patients	Moderate risk	TRUE	3	FALSE	FALSE
ENGLISH	Nurse	Senior level medical or nursing or other clinical leader	FALSE	FALSE	TRUE	FALSE	FALSE	FALSE	FALSE		China	FALSE	FALSE	FALSE	FALSE	TRUE	5	TRUE	5	FALSE	FALSE	TRUE	FALSE	FALSE	FALSE	FALSE	FALSE	FALSE	TRUE	FALSE	FALSE	FALSE	FALSE	FALSE	FALSE	FALSE	FALSE	FALSE	FALSE	FALSE	FALSE	I don't know	Rarely (less than once a year)	Prefer not to answer	Prefer not to answer	FALSE
ENGLISH	Nurse	Senior level medical or nursing or other clinical leader	FALSE	TRUE	FALSE	FALSE	FALSE	FALSE	FALSE			FALSE	TRUE	FALSE	FALSE	FALSE	15	TRUE	3	TRUE	TRUE	FALSE	TRUE	FALSE	FALSE	FALSE	FALSE	FALSE	FALSE	FALSE	FALSE	FALSE	FALSE	TRUE	TRUE	FALSE	TRUE	TRUE	TRUE	TRUE	FALSE	Yes - always with them	Occasionally (more than once a year)	Low harm - little harm was caused to the patients	Moderate risk	TRUE	4	FALSE	FALSE
ENGLISH	Nurse	Junior clinician, junior manager or junior ward staff	FALSE	FALSE	FALSE	TRUE	FALSE	FALSE	FALSE		China	FALSE	TRUE	FALSE	FALSE	FALSE	1	FALSE																												TRUE	5	FALSE	FALSE
ENGLISH	Doctor	Middle grade clinician, middle manager or ward level leader	TRUE	FALSE	TRUE	FALSE	FALSE	FALSE	FALSE		China	FALSE	TRUE	FALSE	FALSE	FALSE	15	TRUE	4	FALSE	FALSE	FALSE	TRUE	FALSE	FALSE	FALSE	FALSE	FALSE	TRUE	FALSE	FALSE	FALSE	TRUE	FALSE	FALSE	TRUE	TRUE	FALSE	FALSE	FALSE	FALSE	No - always in a separate place	Occasionally (more than once a year)	No harm came to the patients	Low risk	TRUE	4	FALSE	FALSE
ENGLISH	Administrator or manager	Senior manager or leader (e.g. CEO, COO)	FALSE	FALSE	FALSE	FALSE	FALSE	TRUE	FALSE		United Kingdom	FALSE	TRUE	FALSE	FALSE	FALSE	15	FALSE																												TRUE	3	FALSE	FALSE
ENGLISH	Nurse	Senior level medical or nursing or other clinical leader	FALSE	FALSE	FALSE	TRUE	FALSE	FALSE	FALSE		China	FALSE	TRUE	FALSE	FALSE	FALSE	5	TRUE	3	TRUE	TRUE	FALSE	FALSE	FALSE	FALSE	FALSE	FALSE	FALSE	FALSE	TRUE	FALSE	FALSE	FALSE	FALSE	TRUE	FALSE	TRUE	FALSE	FALSE	FALSE	FALSE	No - always in a separate place	Occasionally (more than once a year)	Moderate harm - the patients were harmed, but not severely	Moderate risk	TRUE	4	TRUE	FALSE
ENGLISH	Nurse	Senior level medical or nursing or other clinical leader	TRUE	FALSE	FALSE	FALSE	FALSE	FALSE	FALSE		China	FALSE	TRUE	FALSE	FALSE	FALSE	5	TRUE	5	TRUE	FALSE	FALSE	FALSE	FALSE	FALSE	FALSE	FALSE	FALSE	TRUE	FALSE	FALSE	FALSE	FALSE	FALSE	FALSE	FALSE	FALSE	FALSE	FALSE	FALSE	FALSE	Both - in a separate space initially, then afterwards with them	Rarely (less than once a year)	No patient safety incidents have occurred in my experience	Low risk	TRUE	5
ENGLISH	Administrator or manager	Senior level medical or nursing or other clinical leader	FALSE	FALSE	FALSE	FALSE	FALSE	FALSE	FALSE	HEALTHCARE Quality	India	FALSE	TRUE	FALSE	FALSE	FALSE	15	FALSE																												FALSE
ENGLISH	Vendor of EHR	Senior manager or leader (e.g. CEO, COO)	FALSE	FALSE	FALSE	FALSE	FALSE	FALSE	FALSE	Inpatient, outpatient, and post acute		FALSE	FALSE	FALSE	FALSE	TRUE	15	FALSE																												FALSE
ENGLISH	Administrator or manager	Senior manager or leader (e.g. CEO, COO)	FALSE	FALSE	FALSE	FALSE	FALSE	FALSE	FALSE	Develop healthcare standards	Ireland	TRUE	FALSE	FALSE	FALSE	FALSE	15	FALSE																												FALSE
ENGLISH	Doctor	Senior level medical or nursing or other clinical leader	TRUE	FALSE	FALSE	FALSE	FALSE	FALSE	FALSE		United Kingdom	TRUE	FALSE	FALSE	FALSE	FALSE	15	TRUE	4	TRUE	FALSE	TRUE	TRUE	FALSE	TRUE	FALSE	FALSE	FALSE	FALSE	FALSE	FALSE	FALSE	FALSE	FALSE	TRUE	FALSE	TRUE	FALSE	FALSE	FALSE	FALSE	No - always in a separate place	Rarely (less than once a year)	Low harm - little harm was caused to the patients	Moderate risk	TRUE	4	TRUE	FALSE
ENGLISH	Doctor	Senior level medical or nursing or other clinical leader	TRUE	FALSE	FALSE	FALSE	FALSE	FALSE	FALSE			TRUE	FALSE	FALSE	FALSE	FALSE	15	TRUE	3	TRUE	FALSE	TRUE	FALSE	TRUE	FALSE	FALSE	FALSE	FALSE	TRUE	FALSE	TRUE	TRUE	FALSE	FALSE	FALSE	FALSE	FALSE	FALSE	FALSE	FALSE	FALSE	No - always in a separate place	Sometimes (more than once a month)	Severe harm - they have caused Serious Incidents	High risk	TRUE	3	TRUE	FALSE
ENGLISH	Doctor	Senior manager or leader (e.g. CEO, COO)	FALSE	FALSE	TRUE	FALSE	FALSE	FALSE	FALSE		Germany	FALSE	TRUE	FALSE	FALSE	FALSE	15	TRUE	4	FALSE	FALSE	FALSE	FALSE	TRUE	FALSE	FALSE	FALSE	FALSE	FALSE	TRUE	FALSE	FALSE	FALSE	FALSE	FALSE	FALSE	FALSE	FALSE	FALSE	FALSE	FALSE	No - always in a separate place	Occasionally (more than once a year)	No harm came to the patients	Moderate risk	TRUE	4	FALSE	FALSE
ENGLISH	Administrator or manager	Middle grade clinician, middle manager or ward level leader	TRUE	FALSE	FALSE	FALSE	FALSE	FALSE	FALSE		United Kingdom	FALSE	TRUE	FALSE	FALSE	FALSE	15	FALSE																												TRUE	2	FALSE	FALSE
ENGLISH	Nurse	Senior level medical or nursing or other clinical leader	FALSE	FALSE	FALSE	TRUE	FALSE	FALSE	FALSE		Singapore	FALSE	TRUE	FALSE	FALSE	FALSE	10	FALSE																												FALSE
ENGLISH	Doctor	Senior manager or leader (e.g. CEO, COO)	TRUE	FALSE	FALSE	FALSE	FALSE	FALSE	FALSE		United Kingdom	TRUE	FALSE	FALSE	FALSE	FALSE	15	TRUE	4	FALSE	FALSE	TRUE	TRUE	TRUE	FALSE	FALSE	FALSE	FALSE	TRUE	FALSE	FALSE	FALSE	FALSE	TRUE	FALSE	FALSE	TRUE	FALSE	FALSE	FALSE	FALSE	No - always in a separate place	Often (more than once a week)	Low harm - little harm was caused to the patients	Low risk	TRUE	3	FALSE	FALSE
ENGLISH	Doctor	Middle grade clinician, middle manager or ward level leader	FALSE	FALSE	FALSE	TRUE	FALSE	FALSE	FALSE			FALSE	TRUE	FALSE	FALSE	FALSE	15	TRUE	4	FALSE	FALSE	FALSE	FALSE	FALSE	FALSE	TRUE	FALSE	FALSE	TRUE	FALSE	FALSE	FALSE	TRUE	FALSE	FALSE	FALSE	TRUE	TRUE	FALSE	FALSE	FALSE	Sometimes - it varies	Rarely (less than once a year)	No patient safety incidents have occurred in my experience	I don't know	TRUE	4	FALSE	FALSE
ENGLISH	Doctor	Senior level medical or nursing or other clinical leader	TRUE	FALSE	FALSE	FALSE	FALSE	FALSE	FALSE		United Kingdom	FALSE	TRUE	FALSE	FALSE	FALSE	15	TRUE	4	TRUE	FALSE	TRUE	FALSE	FALSE	FALSE	FALSE	FALSE	FALSE	FALSE	FALSE	FALSE	FALSE	TRUE	FALSE	FALSE	FALSE	FALSE	FALSE	FALSE	FALSE	FALSE	No - always in a separate place	Rarely (less than once a year)	Moderate harm - the patients were harmed, but not severely	Low risk	TRUE	4	TRUE	FALSE
ENGLISH	Midwife	Training team	FALSE	FALSE	FALSE	FALSE	FALSE	FALSE	FALSE	Maternity	United Kingdom	TRUE	FALSE	FALSE	FALSE	FALSE	15	TRUE	3	TRUE	FALSE	FALSE	FALSE	FALSE	TRUE	FALSE	FALSE	FALSE	FALSE	FALSE	FALSE	FALSE	FALSE	FALSE	TRUE	TRUE	TRUE	TRUE	TRUE	FALSE	FALSE	Both - in a separate space initially, then afterwards with them	Occasionally (more than once a year)	Moderate harm - the patients were harmed, but not severely	Moderate risk	FALSE
ENGLISH	Midwife	Middle grade clinician, middle manager or ward level leader	TRUE	FALSE	FALSE	FALSE	FALSE	FALSE	FALSE		United Kingdom	TRUE	FALSE	FALSE	FALSE	FALSE	10	TRUE	4	TRUE	FALSE	TRUE	FALSE	FALSE	TRUE	FALSE	FALSE	FALSE	FALSE	FALSE	FALSE	FALSE	FALSE	FALSE	TRUE	TRUE	FALSE	FALSE	FALSE	FALSE	FALSE	Both - in a separate space initially, then afterwards with them	Occasionally (more than once a year)	Low harm - little harm was caused to the patients	Moderate risk	TRUE	3	TRUE	FALSE
ENGLISH	Administrator or manager	Senior manager or leader (e.g. CEO, COO)	FALSE	FALSE	FALSE	FALSE	FALSE	FALSE	FALSE	Digital transformation	China	FALSE	TRUE	FALSE	FALSE	FALSE	15	FALSE																												FALSE
ENGLISH	Doctor	Middle grade clinician, middle manager or ward level leader	FALSE	TRUE	FALSE	FALSE	FALSE	FALSE	FALSE		United Kingdom	TRUE	FALSE	FALSE	FALSE	FALSE	15	TRUE	5	TRUE	TRUE	TRUE	FALSE	TRUE	TRUE	FALSE	FALSE	FALSE	TRUE	FALSE	FALSE	TRUE	FALSE	FALSE	FALSE	FALSE	FALSE	FALSE	FALSE	FALSE	FALSE	No - always in a separate place	Occasionally (more than once a year)	Low harm - little harm was caused to the patients	Low risk	TRUE	3	FALSE	FALSE
ENGLISH	Nurse	Junior clinician, junior manager or junior ward staff	TRUE	TRUE	FALSE	TRUE	TRUE	TRUE	FALSE		China	FALSE	TRUE	FALSE	FALSE	FALSE	5	TRUE	5	TRUE	TRUE	FALSE	FALSE	TRUE	TRUE	FALSE	FALSE	FALSE	TRUE	TRUE	TRUE	TRUE	FALSE	FALSE	FALSE	FALSE	TRUE	FALSE	FALSE	FALSE	FALSE	Yes - always with them	Never (I have not experience this)	No patient safety incidents have occurred in my experience	High risk	FALSE
ENGLISH	Other allied health professional	Senior level medical or nursing or other clinical leader	TRUE	FALSE	FALSE	FALSE	FALSE	FALSE	FALSE		United Kingdom	FALSE	TRUE	TRUE	FALSE	FALSE	15	TRUE	3	TRUE	FALSE	FALSE	TRUE	TRUE	FALSE	FALSE	FALSE	FALSE	TRUE	FALSE	FALSE	FALSE	FALSE	FALSE	FALSE	FALSE	FALSE	FALSE	FALSE	FALSE	FALSE	Both - in a separate space initially, then afterwards with them	Occasionally (more than once a year)	Severe harm - they have caused Serious Incidents	Moderate risk	FALSE
ENGLISH	Administrator or manager	Middle grade clinician, middle manager or ward level leader	TRUE	FALSE	FALSE	FALSE	FALSE	FALSE	FALSE		Qatar	FALSE	TRUE	FALSE	FALSE	FALSE	15	TRUE	3										FALSE	FALSE	FALSE	FALSE	FALSE	FALSE	FALSE	FALSE	TRUE	FALSE	FALSE	TRUE	FALSE	Sometimes - it varies	I don't know	Moderate harm - the patients were harmed, but not severely	High risk	FALSE
ENGLISH	Administrator or manager	Senior manager or leader (e.g. CEO, COO)	FALSE	FALSE	FALSE	FALSE	FALSE	TRUE	FALSE		United Kingdom	FALSE	FALSE	TRUE	FALSE	FALSE	15	FALSE																												FALSE
ENGLISH	Pharmacist	Senior manager or leader (e.g. CEO, COO)	TRUE	FALSE	FALSE	FALSE	TRUE	FALSE	FALSE		United Kingdom	TRUE	TRUE	FALSE	FALSE	FALSE	15	TRUE	4	FALSE	FALSE	TRUE	FALSE	TRUE	TRUE	FALSE	FALSE	FALSE	TRUE	FALSE	FALSE	FALSE	FALSE	FALSE	FALSE	FALSE	FALSE	FALSE	FALSE	FALSE	FALSE	No - always in a separate place	Occasionally (more than once a year)	Low harm - little harm was caused to the patients	Low risk	FALSE
ENGLISH	Nurse	Senior level medical or nursing or other clinical leader	TRUE	FALSE	FALSE	FALSE	FALSE	FALSE	FALSE			FALSE	TRUE	FALSE	FALSE	FALSE	15	TRUE	5	FALSE	FALSE	FALSE	TRUE	FALSE	FALSE	FALSE	FALSE	FALSE	FALSE	FALSE	FALSE	FALSE	FALSE	FALSE	TRUE	FALSE	FALSE	FALSE	FALSE	FALSE	FALSE	Both - in a separate space initially, then afterwards with them	Rarely (less than once a year)	No patient safety incidents have occurred in my experience	High risk	FALSE
ENGLISH	Nurse	Junior clinician, junior manager or junior ward staff	TRUE	FALSE	FALSE	FALSE	FALSE	FALSE	FALSE		China	FALSE	TRUE	FALSE	FALSE	TRUE	5	TRUE	5	TRUE	TRUE	FALSE	FALSE	TRUE	FALSE	FALSE	FALSE	FALSE	FALSE	FALSE	FALSE	FALSE	FALSE	TRUE	FALSE	FALSE	TRUE	FALSE	FALSE	FALSE	FALSE	Yes - always with them	Occasionally (more than once a year)	No harm came to the patients	Low risk	FALSE
ENGLISH	Therapist	Senior level medical or nursing or other clinical leader	FALSE	FALSE	TRUE	FALSE	FALSE	FALSE	FALSE		Netherlands	TRUE	TRUE	FALSE	FALSE	FALSE	5	FALSE																												TRUE	3	FALSE	TRUE
ENGLISH	Nurse	Senior level medical or nursing or other clinical leader	TRUE	TRUE	TRUE	FALSE	FALSE	FALSE	FALSE		Lesotho	FALSE	FALSE	TRUE	FALSE	FALSE	10	TRUE	3	FALSE	TRUE	TRUE	TRUE	FALSE	TRUE	FALSE	FALSE	FALSE	FALSE	FALSE	FALSE	FALSE	TRUE	TRUE	TRUE	FALSE	TRUE	FALSE	FALSE	FALSE	FALSE	Both - in a separate space initially, then afterwards with them	Occasionally (more than once a year)	Moderate harm - the patients were harmed, but not severely	Moderate risk	TRUE	4	FALSE	FALSE
ENGLISH	Doctor	Senior manager or leader (e.g. CEO, COO)	FALSE	FALSE	FALSE	FALSE	FALSE	FALSE	FALSE	Behavioral pediatrician		TRUE	FALSE	FALSE	FALSE	FALSE	15	FALSE																												FALSE
ENGLISH	Midwife	Middle grade clinician, middle manager or ward level leader	TRUE	FALSE	TRUE	FALSE	FALSE	FALSE	FALSE		United Kingdom	TRUE	FALSE	FALSE	FALSE	FALSE	15	TRUE	1	FALSE	FALSE	FALSE	FALSE	TRUE	TRUE	FALSE	FALSE	FALSE	FALSE	FALSE	FALSE	FALSE	FALSE	FALSE	TRUE	TRUE	TRUE	FALSE	FALSE	FALSE	FALSE	No - always in a separate place	Very often (every day)	Severe harm - they have caused Serious Incidents	Very high risk	FALSE
ENGLISH	Nurse	Junior clinician, junior manager or junior ward staff	FALSE	FALSE	FALSE	FALSE	FALSE	TRUE	FALSE		China	FALSE	TRUE	FALSE	FALSE	FALSE	10	TRUE	5	TRUE	FALSE	FALSE	FALSE	FALSE	FALSE	FALSE	FALSE	FALSE	TRUE	FALSE	FALSE	FALSE	FALSE	FALSE	FALSE	FALSE	FALSE	FALSE	FALSE	FALSE	FALSE	No - always in a separate place	Never (I have not experience this)	No patient safety incidents have occurred in my experience	High risk	TRUE	5	TRUE	FALSE
ENGLISH	Nurse	Junior clinician, junior manager or junior ward staff	FALSE	FALSE	FALSE	FALSE	FALSE	TRUE	FALSE		China	FALSE	TRUE	FALSE	FALSE	FALSE	10	TRUE	5	TRUE	FALSE	FALSE	FALSE	FALSE	FALSE	FALSE	FALSE	FALSE	TRUE	FALSE	FALSE	FALSE	FALSE	FALSE	FALSE	FALSE	FALSE	FALSE	FALSE	FALSE	FALSE	No - always in a separate place	Never (I have not experience this)	No patient safety incidents have occurred in my experience	High risk	TRUE	5	TRUE	FALSE
ENGLISH	Administrator or manager	Senior manager or leader (e.g. CEO, COO)	FALSE	FALSE	FALSE	TRUE	FALSE	FALSE	FALSE		United Kingdom	FALSE	TRUE	FALSE	FALSE	FALSE	10	FALSE																												FALSE
ENGLISH	Nurse	Senior level medical or nursing or other clinical leader	FALSE	FALSE	FALSE	TRUE	FALSE	FALSE	FALSE		Lesotho	TRUE	FALSE	FALSE	FALSE	FALSE	10	TRUE	3	TRUE	FALSE	TRUE	TRUE	TRUE	TRUE	FALSE	FALSE	FALSE	FALSE	FALSE	FALSE	FALSE	TRUE	FALSE	TRUE	FALSE	TRUE	FALSE	FALSE	FALSE	FALSE	No - always in a separate place	Often (more than once a week)	Moderate harm - the patients were harmed, but not severely	Moderate risk	TRUE	4	TRUE	TRUE
ENGLISH	Therapist	Junior clinician, junior manager or junior ward staff	FALSE	FALSE	FALSE	TRUE	FALSE	FALSE	FALSE		United States of America	FALSE	FALSE	FALSE	FALSE	TRUE	1	TRUE	5	FALSE	FALSE	FALSE	TRUE	FALSE	FALSE	FALSE	FALSE	FALSE	TRUE	FALSE	TRUE	FALSE	FALSE	TRUE	TRUE	FALSE	TRUE	TRUE	FALSE	FALSE	FALSE	Sometimes - it varies	Rarely (less than once a year)	I don't know the outcome	Low risk	TRUE	4	FALSE	FALSE
ENGLISH	Doctor	Middle grade clinician, middle manager or ward level leader	FALSE	FALSE	FALSE	TRUE	FALSE	FALSE	FALSE		Brazil	FALSE	TRUE	FALSE	FALSE	FALSE	15	TRUE	1	FALSE	FALSE	FALSE	FALSE	FALSE	TRUE	FALSE	FALSE	FALSE	TRUE	FALSE	FALSE	FALSE	FALSE	FALSE	FALSE	FALSE	FALSE	FALSE	FALSE	FALSE	FALSE	Yes - always with them	Sometimes (more than once a month)	Moderate harm - the patients were harmed, but not severely	Low risk	TRUE	3	FALSE	FALSE
ENGLISH	Doctor	Senior level medical or nursing or other clinical leader	FALSE	FALSE	FALSE	TRUE	FALSE	FALSE	FALSE		Namibia	FALSE	TRUE	FALSE	FALSE	FALSE	10	TRUE	3	TRUE	FALSE	FALSE	TRUE	FALSE	FALSE	FALSE	FALSE	FALSE	FALSE	FALSE	FALSE	FALSE	FALSE	FALSE	TRUE	FALSE	FALSE	FALSE	FALSE	FALSE	FALSE	Sometimes - it varies	Rarely (less than once a year)	Low harm - little harm was caused to the patients	Low risk	TRUE	4	TRUE	FALSE
ENGLISH	Doctor	Middle grade clinician, middle manager or ward level leader	FALSE	TRUE	FALSE	FALSE	FALSE	FALSE	FALSE		Botswana	FALSE	TRUE	FALSE	FALSE	FALSE	5	TRUE	4	FALSE	FALSE	FALSE	FALSE	TRUE	TRUE	FALSE	FALSE	FALSE	FALSE	FALSE	FALSE	FALSE	FALSE	FALSE	FALSE	FALSE	TRUE	FALSE	FALSE	FALSE	FALSE	No - always in a separate place	Occasionally (more than once a year)	No harm came to the patients	I don't know	TRUE	4	FALSE	FALSE
ENGLISH	Pharmacist	Senior manager or leader (e.g. CEO, COO)	FALSE	FALSE	FALSE	FALSE	TRUE	FALSE	FALSE		Lesotho	FALSE	TRUE	FALSE	FALSE	FALSE	5	FALSE																												TRUE	1	FALSE	FALSE
ENGLISH	Doctor	Senior level medical or nursing or other clinical leader	FALSE	FALSE	FALSE	TRUE	FALSE	FALSE	FALSE		Eswatini (the Kingdom of)	TRUE	FALSE	FALSE	FALSE	FALSE	5	TRUE	3	TRUE	FALSE	TRUE	TRUE	FALSE	TRUE	FALSE	FALSE	FALSE	TRUE	FALSE	FALSE	FALSE	FALSE	FALSE	FALSE	FALSE	TRUE	FALSE	TRUE	FALSE	FALSE	Sometimes - it varies	Often (more than once a week)	No harm came to the patients	Moderate risk	TRUE	4	TRUE	FALSE
ENGLISH	Nurse	Senior level medical or nursing or other clinical leader	TRUE	FALSE	FALSE	FALSE	FALSE	FALSE	FALSE			TRUE	FALSE	FALSE	FALSE	FALSE	15	TRUE	4	FALSE	FALSE	TRUE	FALSE	FALSE	FALSE	FALSE	FALSE	FALSE	TRUE	FALSE	FALSE	FALSE	FALSE	FALSE	FALSE	FALSE	FALSE	FALSE	FALSE	FALSE	FALSE	Both - in a separate space initially, then afterwards with them	Occasionally (more than once a year)	No patient safety incidents have occurred in my experience	Moderate risk	TRUE	3	FALSE	FALSE
ENGLISH	Nurse	Middle grade clinician, middle manager or ward level leader	TRUE	TRUE	TRUE	FALSE	FALSE	FALSE	FALSE		South Africa	FALSE	TRUE	FALSE	FALSE	FALSE	10	TRUE	3	TRUE	FALSE	TRUE	TRUE	FALSE	TRUE	FALSE	FALSE	FALSE	FALSE	FALSE	FALSE	FALSE	FALSE	TRUE	TRUE	TRUE	FALSE	FALSE	FALSE	FALSE	FALSE	Both - in a separate space initially, then afterwards with them	Sometimes (more than once a month)	Severe harm - they have caused Serious Incidents	High risk	TRUE	3	TRUE	FALSE
ENGLISH	Administrator or manager	Senior level medical or nursing or other clinical leader	TRUE	TRUE	TRUE	TRUE	FALSE	TRUE	FALSE		South Africa	FALSE	TRUE	FALSE	FALSE	FALSE	15	TRUE	2	TRUE	TRUE	FALSE	TRUE	TRUE	TRUE	FALSE	FALSE	FALSE	FALSE	FALSE	FALSE	FALSE	FALSE	TRUE	TRUE	TRUE	TRUE	TRUE	TRUE	FALSE	FALSE	Both - in a separate space initially, then afterwards with them	Occasionally (more than once a year)	Severe harm - they have caused Serious Incidents	Moderate risk	TRUE	2	TRUE	TRUE
ENGLISH	Nurse	Middle grade clinician, middle manager or ward level leader	FALSE	FALSE	FALSE	TRUE	FALSE	FALSE	FALSE		Botswana	TRUE	FALSE	FALSE	FALSE	FALSE	15	TRUE	2	TRUE	FALSE	TRUE	TRUE	FALSE	TRUE	FALSE	FALSE	FALSE	TRUE	FALSE	TRUE	FALSE	FALSE	TRUE	FALSE	FALSE	FALSE	FALSE	FALSE	FALSE	FALSE	No - always in a separate place	Often (more than once a week)	Low harm - little harm was caused to the patients	Moderate risk
ENGLISH	Nurse	Middle grade clinician, middle manager or ward level leader	TRUE	FALSE	FALSE	FALSE	FALSE	FALSE	FALSE		Botswana	TRUE	FALSE	FALSE	FALSE	FALSE	15	TRUE	3	TRUE	FALSE	FALSE	FALSE	FALSE	FALSE	FALSE	FALSE	FALSE	FALSE	FALSE	FALSE	FALSE	FALSE	FALSE	TRUE	FALSE	FALSE	FALSE	FALSE	FALSE	FALSE	Yes - always with them	Occasionally (more than once a year)	No harm came to the patients	No risk at all	TRUE	3	TRUE	FALSE
ENGLISH	Administrator or manager	Senior level medical or nursing or other clinical leader	TRUE	FALSE	FALSE	FALSE	FALSE	FALSE	FALSE		Botswana	FALSE	TRUE	FALSE	FALSE	FALSE	1	TRUE	3	FALSE	FALSE	FALSE	TRUE	TRUE	FALSE	FALSE	FALSE	FALSE	TRUE	FALSE	FALSE	FALSE	FALSE	FALSE	FALSE	FALSE	FALSE	FALSE	FALSE	FALSE	FALSE	Yes - always with them	Very often (every day)	Severe harm - they have caused Serious Incidents	High risk	TRUE	1	FALSE	FALSE
ENGLISH	Doctor	Middle grade clinician, middle manager or ward level leader	TRUE	FALSE	TRUE	FALSE	FALSE	FALSE	FALSE		Eswatini (the Kingdom of)	FALSE	TRUE	FALSE	FALSE	FALSE	5	TRUE	3	TRUE	FALSE	TRUE	FALSE	TRUE	TRUE	FALSE	FALSE	FALSE	FALSE	FALSE	FALSE	FALSE	TRUE	FALSE	TRUE	TRUE	TRUE	TRUE	TRUE	FALSE	FALSE	No - always in a separate place	Sometimes (more than once a month)	Moderate harm - the patients were harmed, but not severely	Moderate risk	TRUE	3	TRUE	FALSE
ENGLISH	Midwife	Senior level medical or nursing or other clinical leader	FALSE	FALSE	FALSE	FALSE	FALSE	FALSE	FALSE	Clinic	Botswana	TRUE	FALSE	FALSE	FALSE	FALSE	10	TRUE	3	FALSE	FALSE	TRUE	FALSE	FALSE	FALSE	FALSE	FALSE	FALSE	FALSE	FALSE	FALSE	FALSE	FALSE	FALSE	TRUE	FALSE	FALSE	FALSE	FALSE	FALSE	FALSE	Yes - always with them	Sometimes (more than once a month)	No harm came to the patients	No risk at all	TRUE	2	FALSE	FALSE
ENGLISH	Nurse	Middle grade clinician, middle manager or ward level leader	TRUE	FALSE	FALSE	FALSE	FALSE	FALSE	FALSE		South Africa	FALSE	TRUE	FALSE	FALSE	FALSE	15	TRUE	3	TRUE	FALSE	FALSE	FALSE	FALSE	FALSE	FALSE	FALSE	FALSE	FALSE	FALSE	FALSE	FALSE	FALSE	FALSE	TRUE	FALSE	TRUE	FALSE	FALSE	FALSE	FALSE	No - always in a separate place	Sometimes (more than once a month)	Severe harm - they have caused Serious Incidents	Moderate risk	TRUE	4	FALSE	FALSE
ENGLISH	Administrator or manager	Senior level medical or nursing or other clinical leader	TRUE	FALSE	FALSE	FALSE	FALSE	FALSE	FALSE		United Arab Emirates	TRUE	FALSE	FALSE	FALSE	FALSE	15	FALSE																												FALSE
ENGLISH	Administrator or manager	Prefer not to answer	FALSE	FALSE	FALSE	FALSE	FALSE	FALSE	TRUE		Botswana	FALSE	TRUE	FALSE	FALSE	FALSE	5	FALSE																												FALSE
ENGLISH	Administrator or manager	Assistant officer	FALSE	FALSE	FALSE	FALSE	FALSE	FALSE	TRUE		United Arab Emirates	FALSE	FALSE	FALSE	FALSE	TRUE	1	FALSE																												FALSE
ENGLISH	Prefer not to answer	Senior level medical or nursing or other clinical leader	FALSE	FALSE	FALSE	FALSE	FALSE	FALSE	FALSE	Infection Preventionist	United Arab Emirates	TRUE	FALSE	FALSE	FALSE	FALSE	10	FALSE																												FALSE
ENGLISH	Nurse	Middle grade clinician, middle manager or ward level leader	FALSE	TRUE	FALSE	FALSE	FALSE	FALSE	FALSE		Botswana	TRUE	FALSE	FALSE	FALSE	FALSE	15	TRUE	4	FALSE	FALSE	FALSE	FALSE	FALSE	TRUE	FALSE	FALSE	FALSE	TRUE	FALSE	FALSE	FALSE	FALSE	TRUE	TRUE	FALSE	FALSE	FALSE	TRUE	FALSE	FALSE	Sometimes - it varies	Sometimes (more than once a month)	Severe harm - they have caused Serious Incidents	Moderate risk	FALSE
ENGLISH	Other allied health professional	Middle grade clinician, middle manager or ward level leader	FALSE	FALSE	FALSE	TRUE	FALSE	FALSE	FALSE		Nigeria	FALSE	TRUE	FALSE	FALSE	FALSE	5	TRUE	3	TRUE	FALSE	TRUE	TRUE	TRUE	TRUE	FALSE	FALSE	FALSE	TRUE	FALSE	FALSE	FALSE	TRUE	TRUE	TRUE	FALSE	TRUE	TRUE	TRUE	FALSE	FALSE	Sometimes - it varies	Rarely (less than once a year)	Low harm - little harm was caused to the patients	Low risk	TRUE	4	TRUE	TRUE
ENGLISH	Nurse	Middle grade clinician, middle manager or ward level leader	TRUE	TRUE	FALSE	TRUE	TRUE	TRUE	FALSE			FALSE	TRUE	FALSE	FALSE	FALSE	15	TRUE	5	TRUE	TRUE	FALSE	FALSE	FALSE	FALSE	FALSE	FALSE	FALSE	TRUE	TRUE	FALSE	TRUE	FALSE	TRUE	FALSE	FALSE	FALSE	FALSE	TRUE	FALSE	FALSE	I don't know	Occasionally (more than once a year)	Low harm - little harm was caused to the patients	Moderate risk	TRUE	5	TRUE	TRUE
ENGLISH	Administrator or manager	Middle grade clinician, middle manager or ward level leader	TRUE	FALSE	FALSE	FALSE	FALSE	FALSE	FALSE		United Arab Emirates	TRUE	FALSE	FALSE	FALSE	FALSE	15	FALSE																												FALSE
ENGLISH	Doctor	Senior level medical or nursing or other clinical leader	FALSE	FALSE	TRUE	FALSE	FALSE	FALSE	FALSE		United States of America	TRUE	TRUE	FALSE	FALSE	FALSE	15	FALSE																												FALSE
ENGLISH	Other allied health professional	Infection control	FALSE	FALSE	FALSE	FALSE	FALSE	FALSE	TRUE		United Arab Emirates	FALSE	TRUE	FALSE	FALSE	FALSE	15	FALSE																												FALSE
ENGLISH	Doctor	Senior level medical or nursing or other clinical leader	TRUE	FALSE	FALSE	FALSE	FALSE	FALSE	FALSE		Botswana	TRUE	FALSE	FALSE	FALSE	FALSE	5	TRUE	3	TRUE	FALSE	FALSE	TRUE	FALSE	FALSE	FALSE	FALSE	FALSE	FALSE	FALSE	FALSE	FALSE	FALSE	FALSE	TRUE	FALSE	TRUE	FALSE	FALSE	FALSE	FALSE	Both - in a separate space initially, then afterwards with them	Sometimes (more than once a month)	Moderate harm - the patients were harmed, but not severely	Low risk	TRUE	2	FALSE	FALSE
ENGLISH	Doctor	Senior level medical or nursing or other clinical leader	FALSE	TRUE	FALSE	FALSE	FALSE	FALSE	FALSE		Eswatini (the Kingdom of)	TRUE	FALSE	FALSE	FALSE	FALSE	15	TRUE	2	FALSE	FALSE	FALSE	TRUE	FALSE	FALSE	FALSE	FALSE	FALSE	FALSE	FALSE	FALSE	FALSE	FALSE	FALSE	TRUE	FALSE	FALSE	FALSE	FALSE	FALSE	FALSE	Sometimes - it varies	Sometimes (more than once a month)	Low harm - little harm was caused to the patients	Moderate risk	TRUE	3	FALSE	FALSE
ENGLISH	Pharmacist	Senior manager or leader (e.g. CEO, COO)	FALSE	FALSE	FALSE	FALSE	TRUE	FALSE	FALSE		Zambia	FALSE	FALSE	TRUE	FALSE	FALSE	15	TRUE	5	TRUE	FALSE	FALSE	FALSE	FALSE	FALSE	FALSE	FALSE	FALSE	FALSE	FALSE	FALSE	FALSE	FALSE	FALSE	TRUE	TRUE	TRUE	FALSE	FALSE	FALSE	FALSE	No - always in a separate place	Rarely (less than once a year)	No patient safety incidents have occurred in my experience	Low risk	FALSE
ENGLISH	Doctor	Senior level medical or nursing or other clinical leader	FALSE	FALSE	TRUE	FALSE	FALSE	FALSE	FALSE		United Kingdom	TRUE	FALSE	FALSE	FALSE	FALSE	15	TRUE	4	TRUE	FALSE	TRUE	FALSE	FALSE	TRUE	FALSE	FALSE	FALSE	TRUE	FALSE	FALSE	FALSE	FALSE	FALSE	FALSE	FALSE	TRUE	FALSE	FALSE	FALSE	FALSE	No - always in a separate place	I don't know	Moderate harm - the patients were harmed, but not severely	Moderate risk	TRUE	4	FALSE	FALSE
ENGLISH	Pharmacist	Prefer not to answer	FALSE	FALSE	FALSE	FALSE	FALSE	FALSE	FALSE	Pharmacist Clinical Order	Eswatini (the Kingdom of)	FALSE	FALSE	TRUE	FALSE	FALSE	1	FALSE																												FALSE
ENGLISH	Administrator or manager	Senior level medical or nursing or other clinical leader	FALSE	TRUE	FALSE	FALSE	FALSE	FALSE	FALSE		Zambia	FALSE	TRUE	FALSE	FALSE	FALSE	15	TRUE	3	TRUE	TRUE	TRUE	TRUE	TRUE	TRUE	FALSE	FALSE	FALSE	FALSE	FALSE	FALSE	FALSE	FALSE	FALSE	TRUE	FALSE	TRUE	TRUE	TRUE	FALSE	FALSE	No - always in a separate place	Occasionally (more than once a year)	Low harm - little harm was caused to the patients	Moderate risk	TRUE	3	FALSE	FALSE
ENGLISH	Administrator or manager	Senior manager or leader (e.g. CEO, COO)	FALSE	FALSE	FALSE	FALSE	FALSE	FALSE	TRUE		United States of America	FALSE	TRUE	FALSE	FALSE	FALSE	15	FALSE																												FALSE
ENGLISH	Doctor	Senior level medical or nursing or other clinical leader	FALSE	FALSE	TRUE	FALSE	FALSE	FALSE	FALSE		United States of America	TRUE	TRUE	FALSE	FALSE	FALSE	15	TRUE	4	FALSE	FALSE	TRUE	FALSE	FALSE	FALSE	FALSE	FALSE	FALSE	TRUE	FALSE	FALSE	FALSE	TRUE	FALSE	FALSE	FALSE	TRUE	FALSE	FALSE	FALSE	FALSE	Sometimes - it varies	Rarely (less than once a year)	Low harm - little harm was caused to the patients	Low risk	TRUE	4	FALSE	FALSE
ENGLISH	Administrator or manager	Senior manager or leader (e.g. CEO, COO)	FALSE	FALSE	FALSE	FALSE	TRUE	FALSE	FALSE			TRUE	FALSE	FALSE	FALSE	FALSE	15	FALSE																												FALSE
ENGLISH	Other allied health professional	Senior manager or leader (e.g. CEO, COO)	FALSE	FALSE	FALSE	TRUE	FALSE	FALSE	FALSE		Botswana	FALSE	TRUE	FALSE	FALSE	FALSE	10	TRUE	3	TRUE	FALSE	FALSE	TRUE	FALSE	FALSE	FALSE	FALSE	FALSE	FALSE	FALSE	FALSE	FALSE	FALSE	FALSE	TRUE	FALSE	TRUE	TRUE	TRUE	FALSE	FALSE	Sometimes - it varies	Rarely (less than once a year)	Low harm - little harm was caused to the patients	Low risk	TRUE	3	TRUE	FALSE
ENGLISH	Administrator or manager	Senior manager or leader (e.g. CEO, COO)	TRUE	FALSE	TRUE	FALSE	FALSE	FALSE	FALSE			TRUE	FALSE	FALSE	FALSE	FALSE	15	FALSE																												FALSE
ENGLISH	Administrator or manager	Middle grade clinician, middle manager or ward level leader	FALSE	FALSE	FALSE	FALSE	TRUE	FALSE	FALSE		United States of America	TRUE	FALSE	FALSE	FALSE	FALSE	15	FALSE																												FALSE
ENGLISH	Nurse	RN care manager	FALSE	FALSE	FALSE	TRUE	FALSE	FALSE	FALSE		United States of America	FALSE	FALSE	FALSE	FALSE	TRUE	10	TRUE	5	FALSE	FALSE	TRUE	TRUE	TRUE	TRUE	FALSE	FALSE	FALSE	TRUE	FALSE	FALSE	FALSE	FALSE	TRUE	FALSE	FALSE	TRUE	TRUE	FALSE	FALSE	FALSE	No - always in a separate place	Never (I have not experience this)	No patient safety incidents have occurred in my experience	Low risk	FALSE
ENGLISH	Nurse	Middle grade clinician, middle manager or ward level leader	FALSE	FALSE	FALSE	TRUE	FALSE	FALSE	FALSE		United States of America	FALSE	FALSE	FALSE	TRUE	FALSE	10	TRUE	4	TRUE	FALSE	FALSE	TRUE	FALSE	FALSE	FALSE	FALSE	FALSE	FALSE	FALSE	FALSE	FALSE	FALSE	FALSE	FALSE	FALSE	TRUE	TRUE	TRUE	FALSE	FALSE	No - always in a separate place	I don't know	No harm came to the patients	I don't know	TRUE	4	FALSE	FALSE
ENGLISH	Other allied health professional	Senior level medical or nursing or other clinical leader	FALSE	FALSE	FALSE	TRUE	FALSE	FALSE	FALSE		Netherlands	FALSE	TRUE	FALSE	FALSE	FALSE	15	TRUE	3	FALSE	FALSE	TRUE	FALSE	FALSE	FALSE	FALSE	FALSE	FALSE	TRUE	FALSE	FALSE	FALSE	TRUE	FALSE	FALSE	FALSE	FALSE	TRUE	TRUE	TRUE	FALSE	No - always in a separate place	Rarely (less than once a year)	No harm came to the patients	Low risk	TRUE	4	FALSE	FALSE
ENGLISH	Nurse	Junior clinician, junior manager or junior ward staff	FALSE	FALSE	FALSE	FALSE	TRUE	FALSE	FALSE		United States of America	TRUE	TRUE	FALSE	FALSE	FALSE	15	TRUE	4	TRUE	FALSE	TRUE	TRUE	FALSE	FALSE	FALSE	FALSE	FALSE	TRUE	FALSE	FALSE	FALSE	FALSE	FALSE	FALSE	FALSE	FALSE	TRUE	TRUE	FALSE	FALSE	No - always in a separate place	Never (I have not experience this)	No patient safety incidents have occurred in my experience	Low risk	TRUE	3	FALSE	FALSE
ENGLISH	Administrator or manager	Senior manager or leader (e.g. CEO, COO)	FALSE	FALSE	FALSE	FALSE	FALSE	FALSE	FALSE	Cancer Care	Australia	FALSE	TRUE	FALSE	FALSE	FALSE	15	FALSE																												FALSE
ENGLISH	Nurse	Senior level medical or nursing or other clinical leader	FALSE	TRUE	FALSE	FALSE	FALSE	FALSE	FALSE		China	TRUE	TRUE	FALSE	FALSE	FALSE	5	FALSE																												TRUE	4	TRUE	TRUE
ENGLISH	Administrator or manager	Senior manager or leader (e.g. CEO, COO)	FALSE	FALSE	FALSE	TRUE	FALSE	FALSE	FALSE		United States of America	TRUE	TRUE	TRUE	FALSE	FALSE	10	FALSE																												FALSE
ENGLISH	Nurse	Senior level medical or nursing or other clinical leader	FALSE	FALSE	FALSE	FALSE	TRUE	FALSE	FALSE		South Africa	FALSE	TRUE	FALSE	FALSE	FALSE	15	TRUE	3	FALSE	TRUE	TRUE	TRUE	TRUE	TRUE	FALSE	FALSE	FALSE	TRUE	FALSE	TRUE	FALSE	FALSE	FALSE	FALSE	FALSE	FALSE	TRUE	FALSE	TRUE	FALSE	Sometimes - it varies	Occasionally (more than once a year)	Low harm - little harm was caused to the patients	Moderate risk	TRUE	3	FALSE	FALSE
ENGLISH	Clinical Psychologist	Senior level medical or nursing or other clinical leader	FALSE	FALSE	FALSE	FALSE	FALSE	TRUE	FALSE			TRUE	FALSE	FALSE	FALSE	FALSE	15	TRUE	3	TRUE	FALSE	TRUE	FALSE	TRUE	TRUE	FALSE	FALSE	FALSE	TRUE	FALSE	FALSE	FALSE	FALSE	TRUE	FALSE	FALSE	TRUE	TRUE	FALSE	FALSE	FALSE	No - always in a separate place	Occasionally (more than once a year)	Low harm - little harm was caused to the patients	Low risk	TRUE	3	TRUE	FALSE
ENGLISH	Doctor	Senior level medical or nursing or other clinical leader	TRUE	FALSE	FALSE	FALSE	FALSE	FALSE	FALSE		United Arab Emirates	FALSE	TRUE	FALSE	FALSE	FALSE	15	TRUE	5										TRUE	TRUE	FALSE	TRUE	FALSE	FALSE	FALSE	FALSE	TRUE	FALSE	TRUE	FALSE	FALSE	Sometimes - it varies	Never (I have not experience this)	No patient safety incidents have occurred in my experience	No risk at all	TRUE	5	FALSE	FALSE
ENGLISH	Doctor	Middle grade clinician, middle manager or ward level leader	TRUE	FALSE	FALSE	FALSE	FALSE	FALSE	FALSE		United Arab Emirates	FALSE	TRUE	FALSE	FALSE	FALSE	5	TRUE	5	FALSE	TRUE	FALSE	FALSE	FALSE	FALSE	FALSE	FALSE	FALSE	TRUE	TRUE	TRUE	FALSE	FALSE	FALSE	TRUE	FALSE	TRUE	FALSE	TRUE	FALSE	FALSE	Sometimes - it varies	Rarely (less than once a year)	No patient safety incidents have occurred in my experience	No risk at all	TRUE	4	TRUE	FALSE
ENGLISH	Doctor	Middle grade clinician, middle manager or ward level leader	TRUE	FALSE	FALSE	FALSE	FALSE	FALSE	FALSE		United Arab Emirates	FALSE	TRUE	FALSE	FALSE	FALSE	15	FALSE																												FALSE
ENGLISH	Doctor	Junior clinician, junior manager or junior ward staff	TRUE	TRUE	TRUE	FALSE	FALSE	FALSE	FALSE		United Arab Emirates	FALSE	TRUE	FALSE	FALSE	FALSE	1	TRUE	4	TRUE	FALSE	FALSE	TRUE	TRUE	TRUE	FALSE	FALSE	FALSE	FALSE	FALSE	FALSE	FALSE	FALSE	FALSE	TRUE	FALSE	TRUE	FALSE	TRUE	TRUE	FALSE	No - always in a separate place	Often (more than once a week)	Low harm - little harm was caused to the patients	Moderate risk	TRUE	3	FALSE	TRUE
ENGLISH	Doctor	Middle grade clinician, middle manager or ward level leader	FALSE	TRUE	FALSE	FALSE	FALSE	FALSE	FALSE		United Arab Emirates	FALSE	TRUE	FALSE	FALSE	FALSE	10	TRUE	5	FALSE	FALSE	FALSE	FALSE	FALSE	TRUE	FALSE	FALSE	FALSE	FALSE	FALSE	FALSE	FALSE	FALSE	FALSE	TRUE	FALSE	FALSE	FALSE	FALSE	FALSE	FALSE	Yes - always with them	Sometimes (more than once a month)	No harm came to the patients	Low risk	TRUE	5	FALSE	FALSE
ENGLISH	Other allied health professional	Senior level medical or nursing or other clinical leader	TRUE	FALSE	FALSE	FALSE	FALSE	FALSE	FALSE		United Arab Emirates	TRUE	FALSE	FALSE	FALSE	FALSE	15	FALSE																												FALSE
ENGLISH	Doctor	Middle grade clinician, middle manager or ward level leader	TRUE	FALSE	FALSE	FALSE	FALSE	FALSE	FALSE		United Arab Emirates	FALSE	TRUE	FALSE	FALSE	FALSE	10	TRUE	4	TRUE	TRUE	TRUE	TRUE	FALSE	FALSE	FALSE	FALSE	FALSE	TRUE	FALSE	FALSE	FALSE	FALSE	FALSE	TRUE	FALSE	FALSE	FALSE	FALSE	FALSE	FALSE	Both - in a separate space initially, then afterwards with them	Sometimes (more than once a month)	Low harm - little harm was caused to the patients	Low risk	TRUE	4	TRUE	FALSE
ENGLISH	Doctor	Middle grade clinician, middle manager or ward level leader	FALSE	TRUE	FALSE	FALSE	FALSE	FALSE	FALSE		China	FALSE	TRUE	FALSE	FALSE	FALSE	15	TRUE	5	FALSE	FALSE	FALSE	TRUE	FALSE	FALSE	FALSE	FALSE	FALSE	TRUE	FALSE	FALSE	FALSE	FALSE	FALSE	FALSE	FALSE	FALSE	FALSE	FALSE	FALSE	FALSE	Yes - always with them	Often (more than once a week)	Moderate harm - the patients were harmed, but not severely	Low risk	TRUE	5	FALSE	FALSE
ENGLISH	Nurse	Middle grade clinician, middle manager or ward level leader	FALSE	FALSE	TRUE	FALSE	FALSE	FALSE	FALSE		Eswatini (the Kingdom of)	FALSE	TRUE	FALSE	FALSE	FALSE	15	TRUE	4	TRUE	FALSE	FALSE	TRUE	FALSE	TRUE	FALSE	FALSE	FALSE	FALSE	FALSE	FALSE	FALSE	FALSE	FALSE	TRUE	FALSE	TRUE	FALSE	TRUE	FALSE	FALSE	Both - in a separate space initially, then afterwards with them	Sometimes (more than once a month)	No harm came to the patients	No risk at all	TRUE	3	TRUE	FALSE
ENGLISH	Administrator or manager	Middle grade clinician, middle manager or ward level leader	TRUE	FALSE	FALSE	FALSE	FALSE	FALSE	FALSE		United Arab Emirates	FALSE	TRUE	FALSE	FALSE	FALSE	15	TRUE	3	TRUE	FALSE	TRUE	TRUE	FALSE	TRUE	FALSE	FALSE	FALSE	TRUE	FALSE	FALSE	FALSE	FALSE	FALSE	TRUE	FALSE	TRUE	TRUE	FALSE	FALSE	FALSE	Both - in a separate space initially, then afterwards with them	Occasionally (more than once a year)	Low harm - little harm was caused to the patients	Moderate risk	FALSE
ENGLISH	Therapist	Junior clinician, junior manager or junior ward staff	TRUE	FALSE	FALSE	FALSE	FALSE	FALSE	FALSE		United States of America	FALSE	TRUE	FALSE	FALSE	FALSE	15	TRUE	3	FALSE	TRUE	FALSE	TRUE	FALSE	TRUE	FALSE	FALSE	FALSE	FALSE	FALSE	FALSE	FALSE	FALSE	FALSE	FALSE	FALSE	TRUE	FALSE	FALSE	FALSE	FALSE	Sometimes - it varies	Occasionally (more than once a year)	No harm came to the patients	Low risk	TRUE	4	FALSE	FALSE
ENGLISH	Doctor	Junior clinician, junior manager or junior ward staff	TRUE	TRUE	FALSE	FALSE	FALSE	FALSE	FALSE		United Arab Emirates	FALSE	TRUE	FALSE	FALSE	FALSE	10	TRUE	2	TRUE	TRUE	TRUE	TRUE	FALSE	FALSE	FALSE	FALSE	FALSE	FALSE	FALSE	FALSE	FALSE	FALSE	TRUE	TRUE	FALSE	FALSE	FALSE	FALSE	FALSE	FALSE	Yes - always with them	Never (I have not experience this)	Low harm - little harm was caused to the patients	I don't know	TRUE	1	TRUE	FALSE
ENGLISH	Nurse	Senior manager or leader (e.g. CEO, COO)	FALSE	FALSE	FALSE	FALSE	FALSE	FALSE	FALSE	Infection preventionist	United Arab Emirates	TRUE	FALSE	FALSE	FALSE	FALSE	15	FALSE																												FALSE
ENGLISH	Doctor	Senior level medical or nursing or other clinical leader	FALSE	TRUE	FALSE	FALSE	FALSE	FALSE	FALSE		Botswana	FALSE	TRUE	FALSE	FALSE	FALSE	15	TRUE	5	FALSE	TRUE	FALSE	FALSE	FALSE	FALSE	FALSE	FALSE	FALSE	TRUE	TRUE	FALSE	FALSE	FALSE	FALSE	TRUE	FALSE	TRUE	TRUE	FALSE	FALSE	FALSE	Both - in a separate space initially, then afterwards with them	Rarely (less than once a year)	No harm came to the patients	High risk	TRUE	4
ENGLISH	Nurse	Senior level medical or nursing or other clinical leader	TRUE	FALSE	FALSE	TRUE	TRUE	FALSE	FALSE		Lesotho	FALSE	TRUE	FALSE	FALSE	FALSE	1	TRUE	3	TRUE	TRUE	FALSE	TRUE	FALSE	TRUE	FALSE	FALSE	FALSE	FALSE	FALSE	FALSE	FALSE	FALSE	TRUE	TRUE	TRUE	TRUE	FALSE	FALSE	FALSE	FALSE	Yes - always with them	Often (more than once a week)	Low harm - little harm was caused to the patients	Moderate risk	TRUE	3	TRUE	FALSE
ENGLISH	Midwife	Senior level medical or nursing or other clinical leader	FALSE	FALSE	TRUE	FALSE	FALSE	FALSE	FALSE		Lesotho	TRUE	FALSE	FALSE	FALSE	FALSE	10	FALSE																												TRUE	3	FALSE	FALSE
ENGLISH	Nurse	Junior clinician, junior manager or junior ward staff	FALSE	TRUE	FALSE	FALSE	FALSE	FALSE	FALSE		South Africa	FALSE	TRUE	FALSE	FALSE	FALSE	5	TRUE	3	FALSE	FALSE	FALSE	TRUE	FALSE	FALSE	FALSE	FALSE	FALSE	FALSE	FALSE	FALSE	FALSE	FALSE	FALSE	TRUE	FALSE	FALSE	FALSE	FALSE	FALSE	FALSE	Yes - always with them	Occasionally (more than once a year)	No harm came to the patients	Moderate risk	TRUE	2	FALSE	TRUE
ENGLISH	Nurse	Junior clinician, junior manager or junior ward staff	FALSE	FALSE	FALSE	TRUE	FALSE	FALSE	FALSE		Lesotho	TRUE	TRUE	FALSE	FALSE	FALSE	5	TRUE	2	TRUE	FALSE	TRUE	FALSE	FALSE	FALSE	FALSE	FALSE	FALSE	FALSE	FALSE	FALSE	FALSE	FALSE	FALSE	TRUE	FALSE	FALSE	FALSE	FALSE	FALSE	FALSE	Sometimes - it varies	Sometimes (more than once a month)	Low harm - little harm was caused to the patients	Moderate risk	TRUE	3	FALSE	TRUE
ENGLISH	Other allied health professional	Senior level medical or nursing or other clinical leader	TRUE	FALSE	FALSE	FALSE	FALSE	FALSE	FALSE		Lesotho	FALSE	FALSE	TRUE	FALSE	FALSE	5	FALSE																												TRUE	4	FALSE	FALSE
ENGLISH	Community Mobilization and social Behavour Change Communications	Junior clinician, junior manager or junior ward staff	FALSE	FALSE	FALSE	FALSE	TRUE	FALSE	FALSE			FALSE	FALSE	TRUE	FALSE	FALSE	5	TRUE	4	FALSE	TRUE	FALSE	FALSE	FALSE	FALSE	FALSE	FALSE	FALSE	FALSE	FALSE	FALSE	FALSE	TRUE	FALSE	FALSE	FALSE	FALSE	FALSE	FALSE	FALSE	FALSE	No - always in a separate place	Never (I have not experience this)	I don't know the outcome	Low risk	TRUE	4	FALSE	FALSE
ENGLISH	Nurse	Middle grade clinician, middle manager or ward level leader	FALSE	TRUE	FALSE	FALSE	FALSE	FALSE	FALSE		United Kingdom	TRUE	FALSE	FALSE	FALSE	FALSE	15	TRUE	4	FALSE	TRUE	FALSE	TRUE	FALSE	FALSE	FALSE	FALSE	FALSE	TRUE	FALSE	FALSE	TRUE	FALSE	FALSE	FALSE	FALSE	TRUE	FALSE	FALSE	FALSE	FALSE	Sometimes - it varies	Rarely (less than once a year)	I don't know the outcome	Low risk	FALSE
ENGLISH	Doctor	Senior level medical or nursing or other clinical leader	FALSE	TRUE	FALSE	FALSE	FALSE	FALSE	FALSE		New Zealand	TRUE	FALSE	FALSE	FALSE	FALSE	15	TRUE	3	FALSE	FALSE	TRUE	FALSE	FALSE	TRUE	FALSE	FALSE	FALSE	TRUE	FALSE	FALSE	TRUE	FALSE	FALSE	TRUE	FALSE	TRUE	FALSE	TRUE	FALSE	FALSE	No - always in a separate place	Sometimes (more than once a month)	Severe harm - they have caused Serious Incidents	Moderate risk	TRUE	3	FALSE	FALSE
ENGLISH	Nurse	Senior level medical or nursing or other clinical leader	FALSE	FALSE	TRUE	FALSE	FALSE	FALSE	FALSE		United Kingdom	FALSE	TRUE	FALSE	FALSE	FALSE	15	TRUE	4	TRUE	FALSE	FALSE	FALSE	FALSE	FALSE	FALSE	FALSE	FALSE	FALSE	FALSE	FALSE	FALSE	FALSE	FALSE	FALSE	FALSE	TRUE	FALSE	FALSE	FALSE	FALSE	Both - in a separate space initially, then afterwards with them	Occasionally (more than once a year)	No harm came to the patients	Low risk	FALSE
ENGLISH	Administrator or manager	Senior manager or leader (e.g. CEO, COO)	FALSE	FALSE	FALSE	FALSE	FALSE	TRUE	FALSE		Australia	FALSE	FALSE	TRUE	FALSE	FALSE	10	FALSE																												TRUE	4
ENGLISH	Midwife	Middle grade clinician, middle manager or ward level leader	FALSE	FALSE	FALSE	FALSE	TRUE	FALSE	FALSE		United Kingdom	TRUE	FALSE	FALSE	FALSE	FALSE	1	TRUE	5										FALSE	FALSE	FALSE	FALSE	FALSE	TRUE	FALSE	FALSE	FALSE	FALSE	FALSE	FALSE	FALSE	Sometimes - it varies	Never (I have not experience this)	No patient safety incidents have occurred in my experience	Low risk	TRUE	5
ENGLISH	Administrator or manager	Senior manager or leader (e.g. CEO, COO)	FALSE	FALSE	FALSE	FALSE	FALSE	TRUE	FALSE		Australia	TRUE	FALSE	FALSE	FALSE	FALSE	10	TRUE	4										FALSE	FALSE	FALSE	FALSE	FALSE	TRUE	FALSE	FALSE	FALSE	FALSE	TRUE	FALSE	FALSE	No - always in a separate place	Sometimes (more than once a month)	Low harm - little harm was caused to the patients	Moderate risk	FALSE
ENGLISH	Administrator or manager	Consultant level medical or nursing or other clinical leader	FALSE	TRUE	FALSE	FALSE	FALSE	FALSE	FALSE		United States of America	FALSE	TRUE	FALSE	FALSE	FALSE	5	FALSE																												FALSE
ENGLISH	Other allied health professional	Junior clinician, junior manager or junior ward staff	FALSE	TRUE	FALSE	FALSE	FALSE	FALSE	FALSE		United Kingdom	TRUE	FALSE	FALSE	FALSE	FALSE	5	TRUE	3										FALSE	FALSE	FALSE	FALSE	FALSE	FALSE	TRUE	TRUE	TRUE	FALSE	TRUE	FALSE	FALSE	Sometimes - it varies	Often (more than once a week)	Moderate harm - the patients were harmed, but not severely	Moderate risk	FALSE
ENGLISH	Other allied health professional	Nursing assistant	TRUE	TRUE	TRUE	FALSE	FALSE	TRUE	FALSE		United Kingdom	TRUE	FALSE	FALSE	FALSE	FALSE	5	TRUE	4										TRUE	TRUE	FALSE	TRUE	FALSE	FALSE	TRUE	TRUE	TRUE	FALSE	TRUE	FALSE	FALSE	Sometimes - it varies	Occasionally (more than once a year)	Low harm - little harm was caused to the patients	High risk	FALSE
ENGLISH	Other allied health professional	Consultant level medical or nursing or other clinical leader	FALSE	FALSE	FALSE	FALSE	FALSE	TRUE	FALSE		Australia	FALSE	FALSE	TRUE	FALSE	FALSE	10	TRUE	4	TRUE	FALSE	FALSE	TRUE	FALSE	FALSE	FALSE	FALSE	FALSE	TRUE	FALSE	FALSE	TRUE	FALSE	FALSE	FALSE	FALSE	FALSE	FALSE	FALSE	FALSE	FALSE	Yes - always with them	Rarely (less than once a year)	No harm came to the patients	Moderate risk	FALSE
ENGLISH	Pharmacist	Middle grade clinician, middle manager or ward level leader	TRUE	FALSE	FALSE	FALSE	FALSE	FALSE	FALSE		United Arab Emirates	TRUE	FALSE	FALSE	FALSE	FALSE	15	TRUE	3	TRUE	TRUE	TRUE	TRUE	TRUE	TRUE	FALSE	FALSE	FALSE	TRUE	FALSE	FALSE	FALSE	FALSE	FALSE	FALSE	FALSE	TRUE	FALSE	FALSE	FALSE	FALSE	Yes - always with them	Occasionally (more than once a year)	Low harm - little harm was caused to the patients	Low risk	FALSE
ENGLISH	Administrator or manager	Senior manager or leader (e.g. CEO, COO)	TRUE	FALSE	TRUE	FALSE	FALSE	FALSE	FALSE		United Kingdom	FALSE	TRUE	FALSE	FALSE	FALSE	15	FALSE																												FALSE
ENGLISH	Other allied health professional	senior laboratory technologist	TRUE	FALSE	FALSE	FALSE	FALSE	FALSE	FALSE		United Arab Emirates	TRUE	TRUE	FALSE	FALSE	FALSE	10	TRUE	3	FALSE	FALSE	FALSE	TRUE	TRUE	TRUE	FALSE	FALSE	FALSE	FALSE	FALSE	FALSE	FALSE	TRUE	FALSE	TRUE	TRUE	TRUE	FALSE	FALSE	FALSE	FALSE	Sometimes - it varies	Occasionally (more than once a year)	No harm came to the patients	Low risk	FALSE
SPANISH	Doctor	Senior level medical or nursing or other clinical leader	FALSE	FALSE	TRUE	FALSE	FALSE	FALSE	FALSE		Colombia	FALSE	TRUE	FALSE	FALSE	FALSE	10	TRUE	4	FALSE	FALSE	FALSE	FALSE	TRUE	FALSE	FALSE	FALSE	FALSE	TRUE	FALSE	FALSE	FALSE	FALSE	FALSE	FALSE	FALSE	FALSE	FALSE	FALSE	FALSE	FALSE	No - always in a separate place	Sometimes (more than once a month)	Low harm - little harm was caused to the patients	Low Risk	TRUE	4	FALSE	FALSE
SPANISH	Doctor	Middle grade clinician, middle manager or ward level leader	TRUE	FALSE	TRUE	TRUE	FALSE	FALSE	FALSE		Colombia	FALSE	TRUE	FALSE	FALSE	FALSE	1	TRUE	4	FALSE	TRUE	FALSE	FALSE	TRUE	FALSE	FALSE	FALSE	FALSE	TRUE	TRUE	FALSE	FALSE	TRUE	FALSE	FALSE	FALSE	TRUE	FALSE	TRUE	FALSE	FALSE	Both - in a separate space initially, then afterwards with them	Occasionally (more than once a year)	Low harm - little harm was caused to the patients	Low Risk	TRUE	2	TRUE	FALSE
SPANISH	Doctor	Senior level medical or nursing or other clinical leader	FALSE	FALSE	TRUE	FALSE	FALSE	FALSE	FALSE		Colombia	FALSE	TRUE	FALSE	FALSE	FALSE	5	FALSE																												FALSE
SPANISH	Doctor	Middle grade clinician, middle manager or ward level leader	FALSE	FALSE	FALSE	FALSE	FALSE	FALSE	FALSE	Otro	Colombia	TRUE	TRUE	FALSE	FALSE	FALSE	15	TRUE	5	FALSE	FALSE	TRUE	FALSE	TRUE	FALSE	FALSE	FALSE	TRUE	TRUE	FALSE	FALSE	FALSE	FALSE	FALSE	FALSE	FALSE	FALSE	FALSE	FALSE	FALSE	FALSE	No - always in a separate place	Sometimes (more than once a month)	I don't know the outcome	Moderate Risk	TRUE	5	FALSE	FALSE
SPANISH	Other allied health professional	Senior level medical or nursing or other clinical leader	FALSE	FALSE	FALSE	FALSE	FALSE	FALSE	FALSE	Otro	Colombia	FALSE	TRUE	FALSE	FALSE	FALSE	15	TRUE	4	FALSE	FALSE	FALSE	FALSE	FALSE	TRUE	FALSE	FALSE	FALSE	TRUE	FALSE	FALSE	FALSE	FALSE	FALSE	FALSE	FALSE	FALSE	FALSE	FALSE	FALSE	FALSE	Sometimes - it varies	Rarely (less than once a year)	I don't know the outcome	I don't know	FALSE
SPANISH	Doctor	Senior level medical or nursing or other clinical leader	TRUE	FALSE	FALSE	FALSE	FALSE	FALSE	FALSE		Colombia	FALSE	TRUE	FALSE	FALSE	FALSE	10	FALSE																												TRUE	2	TRUE	FALSE
SPANISH	Midwife	Senior manager or leader (e.g. CEO, COO)	TRUE	FALSE	TRUE	FALSE	FALSE	FALSE	FALSE		Colombia	TRUE	TRUE	FALSE	FALSE	FALSE	15	FALSE																												TRUE	5	FALSE	TRUE
SPANISH	Nurse	Other	TRUE	FALSE	FALSE	FALSE	FALSE	FALSE	FALSE		Colombia	FALSE	TRUE	FALSE	FALSE	FALSE	10	TRUE	5	TRUE	FALSE	TRUE	TRUE	FALSE	FALSE	FALSE	FALSE	FALSE	TRUE	FALSE	FALSE	FALSE	FALSE	FALSE	FALSE	FALSE	TRUE	FALSE	FALSE	FALSE	FALSE	Both - in a separate space initially, then afterwards with them	Occasionally (more than once a year)	No harm came to the patients	Low Risk	TRUE	5	FALSE	FALSE
SPANISH	Nurse	Other	FALSE	TRUE	FALSE	FALSE	FALSE	FALSE	FALSE		Colombia	TRUE	FALSE	FALSE	FALSE	FALSE	1	TRUE	5	FALSE	FALSE	FALSE	FALSE	FALSE	TRUE	FALSE	FALSE	FALSE	FALSE	FALSE	FALSE	FALSE	FALSE	FALSE	FALSE	FALSE	TRUE	FALSE	FALSE	FALSE	FALSE	Yes - always with them	I don't know	No patient safety incidents have occurred in my experience	Low Risk	FALSE
SPANISH	Nurse	Other	TRUE	FALSE	FALSE	FALSE	FALSE	FALSE	FALSE		Colombia	TRUE	TRUE	FALSE	FALSE	FALSE	15	TRUE	5	TRUE	FALSE	FALSE	TRUE	FALSE	FALSE	FALSE	FALSE	FALSE	TRUE	FALSE	FALSE	FALSE	FALSE	FALSE	FALSE	FALSE	TRUE	FALSE	TRUE	FALSE	FALSE	Both - in a separate space initially, then afterwards with them	Rarely (less than once a year)	No patient safety incidents have occurred in my experience	Low Risk	FALSE
SPANISH	Nurse	Other	TRUE	FALSE	FALSE	FALSE	FALSE	FALSE	FALSE		Colombia	TRUE	FALSE	FALSE	FALSE	FALSE	1	TRUE	4	TRUE	FALSE	FALSE	FALSE	FALSE	FALSE	FALSE	FALSE	FALSE	TRUE	FALSE	FALSE	FALSE	FALSE	FALSE	FALSE	FALSE	TRUE	TRUE	TRUE	FALSE	FALSE	Both - in a separate space initially, then afterwards with them	Occasionally (more than once a year)	Low harm - little harm was caused to the patients	Low Risk	FALSE
SPANISH	Doctor	Senior level medical or nursing or other clinical leader	FALSE	FALSE	TRUE	FALSE	FALSE	FALSE	FALSE		Colombia	FALSE	TRUE	FALSE	FALSE	FALSE	15	TRUE	4	FALSE	FALSE	TRUE	FALSE	FALSE	FALSE	FALSE	FALSE	FALSE	FALSE	FALSE	FALSE	FALSE	TRUE	FALSE	FALSE	FALSE	TRUE	FALSE	TRUE	FALSE	FALSE	No - always in a separate place	Rarely (less than once a year)	Low harm - little harm was caused to the patients	Low Risk	TRUE	4	FALSE	FALSE
SPANISH	Nurse	Other	FALSE	TRUE	FALSE	FALSE	FALSE	FALSE	FALSE		Colombia	FALSE	TRUE	FALSE	FALSE	FALSE	10	TRUE	4	TRUE	FALSE	FALSE	FALSE	FALSE	FALSE	FALSE	FALSE	FALSE	FALSE	TRUE	FALSE	FALSE	FALSE	FALSE	FALSE	FALSE	FALSE	FALSE	FALSE	FALSE	FALSE	Both - in a separate space initially, then afterwards with them	Occasionally (more than once a year)	Low harm - little harm was caused to the patients	Low Risk	FALSE
SPANISH	Administrator or manager	Senior level medical or nursing or other clinical leader	FALSE	FALSE	FALSE	FALSE	FALSE	FALSE	FALSE	Otro	Colombia	FALSE	FALSE	FALSE	FALSE	TRUE	15	FALSE																												FALSE
SPANISH	Nurse	Other	TRUE	FALSE	FALSE	FALSE	FALSE	FALSE	FALSE		Colombia	FALSE	TRUE	FALSE	FALSE	FALSE	15	TRUE	4	FALSE	FALSE	TRUE	FALSE	FALSE	FALSE	FALSE	FALSE	FALSE	FALSE	FALSE	FALSE	FALSE	FALSE	FALSE	FALSE	FALSE	TRUE	FALSE	FALSE	FALSE	FALSE	Yes - always with them	Occasionally (more than once a year)	No harm came to the patients	Moderate Risk	TRUE	4	FALSE	FALSE
SPANISH	Nurse	Other	FALSE	FALSE	TRUE	FALSE	FALSE	FALSE	FALSE		Colombia	FALSE	FALSE	FALSE	FALSE	TRUE	5	FALSE																												FALSE
SPANISH	Doctor	Middle grade clinician, middle manager or ward level leader	TRUE	FALSE	FALSE	FALSE	FALSE	FALSE	FALSE		Colombia	FALSE	TRUE	FALSE	FALSE	FALSE	10	TRUE	4	TRUE	FALSE	TRUE	FALSE	FALSE	FALSE	FALSE	FALSE	FALSE	TRUE	FALSE	FALSE	FALSE	FALSE	FALSE	FALSE	FALSE	FALSE	FALSE	FALSE	FALSE	FALSE	Sometimes - it varies	Occasionally (more than once a year)	No harm came to the patients	I don't know	TRUE	4	TRUE	FALSE
SPANISH	Doctor	Senior level medical or nursing or other clinical leader	TRUE	FALSE	FALSE	FALSE	FALSE	FALSE	FALSE		Colombia	FALSE	TRUE	FALSE	FALSE	FALSE	15	TRUE	2	FALSE	FALSE	TRUE	FALSE	FALSE	FALSE	FALSE	FALSE	FALSE	TRUE	FALSE	FALSE	FALSE	FALSE	FALSE	FALSE	FALSE	FALSE	FALSE	FALSE	FALSE	FALSE	Yes - always with them	Sometimes (more than once a month)	Low harm - little harm was caused to the patients	Low Risk	TRUE	4	TRUE	FALSE
SPANISH	Doctor	Middle grade clinician, middle manager or ward level leader	TRUE	FALSE	FALSE	FALSE	FALSE	FALSE	FALSE		Colombia	FALSE	TRUE	FALSE	FALSE	FALSE	5	TRUE	3	FALSE	FALSE	TRUE	FALSE	FALSE	FALSE	FALSE	FALSE	FALSE	FALSE	FALSE	FALSE	FALSE	TRUE	FALSE	FALSE	FALSE	FALSE	FALSE	FALSE	FALSE	FALSE	Never - we use online or phone-based systems	Never (I have not experience this)	No patient safety incidents have occurred in my experience	Low Risk	TRUE	3	FALSE	FALSE
SPANISH	Doctor	Middle grade clinician, middle manager or ward level leader	TRUE	FALSE	FALSE	FALSE	FALSE	FALSE	FALSE		Colombia	TRUE	FALSE	FALSE	FALSE	FALSE	1	FALSE																												TRUE	4	FALSE	FALSE
SPANISH	Doctor	Middle grade clinician, middle manager or ward level leader	FALSE	TRUE	FALSE	FALSE	FALSE	FALSE	FALSE		Colombia	FALSE	TRUE	FALSE	FALSE	FALSE	5	TRUE	4	TRUE	TRUE	FALSE	TRUE	FALSE	FALSE	FALSE	FALSE	FALSE	FALSE	TRUE	FALSE	FALSE	FALSE	FALSE	FALSE	FALSE	TRUE	FALSE	FALSE	FALSE	FALSE	Yes - always with them	Occasionally (more than once a year)	No harm came to the patients	Low Risk	TRUE	5	FALSE	TRUE
SPANISH	Doctor	Middle grade clinician, middle manager or ward level leader	FALSE	TRUE	FALSE	FALSE	FALSE	FALSE	FALSE		Colombia	FALSE	TRUE	FALSE	FALSE	FALSE	1	TRUE	4	FALSE	FALSE	TRUE	TRUE	FALSE	TRUE	FALSE	FALSE	FALSE	TRUE	FALSE	FALSE	TRUE	FALSE	FALSE	FALSE	FALSE	TRUE	FALSE	FALSE	FALSE	FALSE	Sometimes - it varies	Sometimes (more than once a month)	No harm came to the patients	Low Risk	TRUE	3	FALSE	FALSE
SPANISH	Doctor	Middle grade clinician, middle manager or ward level leader	FALSE	TRUE	FALSE	FALSE	FALSE	FALSE	FALSE		Colombia	FALSE	TRUE	FALSE	FALSE	FALSE	1	TRUE	4	FALSE	FALSE	FALSE	TRUE	FALSE	FALSE	FALSE	FALSE	FALSE	TRUE	FALSE	FALSE	FALSE	FALSE	FALSE	FALSE	FALSE	TRUE	FALSE	FALSE	FALSE	FALSE	Sometimes - it varies	Rarely (less than once a year)	No harm came to the patients	High Risk	TRUE	4	FALSE	FALSE
SPANISH	Nurse	Other	FALSE	FALSE	FALSE	FALSE	FALSE	FALSE	FALSE	Otro	Colombia	FALSE	FALSE	FALSE	FALSE	TRUE	15	FALSE																												FALSE
SPANISH	Nurse	Other	FALSE	FALSE	FALSE	FALSE	FALSE	FALSE	FALSE	Otro	Colombia	FALSE	FALSE	FALSE	FALSE	TRUE	15	TRUE	4	FALSE	FALSE	FALSE	FALSE	TRUE	FALSE	FALSE	FALSE	FALSE	FALSE	FALSE	FALSE	FALSE	FALSE	FALSE	FALSE	FALSE	TRUE	FALSE	FALSE	FALSE	FALSE	Yes - always with them	Rarely (less than once a year)	No patient safety incidents have occurred in my experience	Low Risk	FALSE
SPANISH	Nurse	Other	FALSE	FALSE	TRUE	FALSE	FALSE	FALSE	FALSE		Colombia	TRUE	TRUE	FALSE	FALSE	FALSE	10	TRUE	4	FALSE	FALSE	FALSE	TRUE	FALSE	FALSE	FALSE	FALSE	FALSE	TRUE	FALSE	FALSE	FALSE	TRUE	FALSE	FALSE	FALSE	TRUE	FALSE	TRUE	FALSE	FALSE	Both - in a separate space initially, then afterwards with them	Occasionally (more than once a year)	No harm came to the patients	Moderate Risk	TRUE	4	FALSE	FALSE
SPANISH	Nurse	Other	FALSE	FALSE	FALSE	FALSE	FALSE	FALSE	FALSE	Otro	Colombia	FALSE	FALSE	FALSE	FALSE	TRUE	10	TRUE	4	FALSE	FALSE	FALSE	TRUE	FALSE	FALSE	FALSE	FALSE	FALSE	FALSE	FALSE	FALSE	FALSE	FALSE	FALSE	FALSE	FALSE	TRUE	FALSE	FALSE	FALSE	FALSE	Yes - always with them	Never (I have not experience this)	No patient safety incidents have occurred in my experience	Low Risk	FALSE
SPANISH	Nurse	Other	FALSE	FALSE	FALSE	FALSE	FALSE	FALSE	FALSE	Otro	Colombia	FALSE	FALSE	FALSE	FALSE	TRUE	5	TRUE	3	TRUE	FALSE	FALSE	FALSE	FALSE	FALSE	FALSE	FALSE	FALSE	TRUE	FALSE	FALSE	FALSE	FALSE	FALSE	FALSE	FALSE	FALSE	FALSE	FALSE	FALSE	FALSE	Sometimes - it varies	Never (I have not experience this)	No patient safety incidents have occurred in my experience	Low Risk	TRUE	2	TRUE	FALSE
SPANISH	Nurse	Other	FALSE	FALSE	FALSE	FALSE	FALSE	FALSE	FALSE	Otro	Colombia	FALSE	FALSE	FALSE	FALSE	TRUE	5	TRUE	5	FALSE	FALSE	FALSE	FALSE	FALSE	TRUE	FALSE	FALSE	FALSE	FALSE	FALSE	FALSE	FALSE	FALSE	FALSE	FALSE	FALSE	TRUE	FALSE	TRUE	FALSE	FALSE	Yes - always with them	#N/A	No patient safety incidents have occurred in my experience	No Risk At All	FALSE
SPANISH	Nurse	Other	FALSE	TRUE	FALSE	FALSE	FALSE	FALSE	FALSE		Colombia	FALSE	TRUE	FALSE	FALSE	FALSE	5	TRUE	2	FALSE	FALSE	TRUE	TRUE	TRUE	TRUE	FALSE	FALSE	FALSE	TRUE	FALSE	FALSE	FALSE	FALSE	FALSE	TRUE	FALSE	TRUE	FALSE	TRUE	FALSE	FALSE	Both - in a separate space initially, then afterwards with them	#N/A	No patient safety incidents have occurred in my experience	High Risk	TRUE	5	FALSE	FALSE
SPANISH	Nurse	Other	TRUE	TRUE	FALSE	FALSE	FALSE	FALSE	FALSE		Colombia	FALSE	TRUE	FALSE	FALSE	FALSE	1	TRUE	5	FALSE	FALSE	FALSE	FALSE	FALSE	FALSE	TRUE	FALSE	FALSE	TRUE	FALSE	FALSE	FALSE	FALSE	FALSE	FALSE	FALSE	TRUE	FALSE	FALSE	FALSE	FALSE	Both - in a separate space initially, then afterwards with them	Rarely (less than once a year)	No harm came to the patients	Moderate Risk	TRUE	5	TRUE	FALSE
SPANISH	Nurse	Other	TRUE	FALSE	FALSE	FALSE	FALSE	FALSE	FALSE		Colombia	TRUE	FALSE	FALSE	FALSE	FALSE	1	TRUE	4	TRUE	FALSE	FALSE	FALSE	FALSE	FALSE	FALSE	FALSE	FALSE	TRUE	FALSE	FALSE	FALSE	FALSE	FALSE	FALSE	FALSE	FALSE	FALSE	FALSE	FALSE	FALSE	No - always in a separate place	Sometimes (more than once a month)	Low harm - little harm was caused to the patients	Very high risk	FALSE
SPANISH	Nurse	Other	FALSE	FALSE	FALSE	FALSE	FALSE	FALSE	FALSE	Otro	Colombia	TRUE	TRUE	FALSE	FALSE	FALSE	10	FALSE																												FALSE
SPANISH	Nurse	Other	FALSE	FALSE	FALSE	FALSE	FALSE	FALSE	FALSE	Otro	Colombia	FALSE	FALSE	FALSE	FALSE	TRUE	10	TRUE	5	FALSE	TRUE	FALSE	FALSE	FALSE	FALSE	FALSE	FALSE	FALSE	FALSE	TRUE	FALSE	FALSE	FALSE	FALSE	FALSE	FALSE	FALSE	FALSE	FALSE	FALSE	FALSE	Both - in a separate space initially, then afterwards with them	Never (I have not experience this)	No patient safety incidents have occurred in my experience	Low Risk	FALSE
SPANISH	Nurse	Other	FALSE	FALSE	TRUE	FALSE	FALSE	FALSE	FALSE		Colombia	TRUE	TRUE	FALSE	FALSE	FALSE	10	TRUE	4	FALSE	FALSE	TRUE	TRUE	TRUE	TRUE	FALSE	FALSE	FALSE	FALSE	TRUE	FALSE	FALSE	TRUE	FALSE	TRUE	FALSE	FALSE	FALSE	FALSE	FALSE	FALSE	Yes - always with them	Sometimes (more than once a month)	Low harm - little harm was caused to the patients	Low Risk	TRUE	3	FALSE	TRUE
SPANISH	Nurse	Other	TRUE	FALSE	FALSE	FALSE	FALSE	FALSE	FALSE		Colombia	FALSE	FALSE	FALSE	FALSE	TRUE	1	TRUE	5	FALSE	FALSE	TRUE	FALSE	FALSE	FALSE	FALSE	FALSE	FALSE	FALSE	FALSE	TRUE	FALSE	FALSE	FALSE	FALSE	FALSE	FALSE	FALSE	FALSE	FALSE	FALSE	Yes - always with them	Occasionally (more than once a year)	No harm came to the patients	I don't know	FALSE
SPANISH	Nurse	Other	FALSE	FALSE	FALSE	FALSE	FALSE	FALSE	FALSE	Otro	Colombia	FALSE	FALSE	FALSE	FALSE	TRUE	5	TRUE	4	FALSE	FALSE	TRUE	FALSE	FALSE	FALSE	FALSE	FALSE	FALSE	FALSE	FALSE	FALSE	FALSE	FALSE	FALSE	FALSE	FALSE	FALSE	FALSE	TRUE	FALSE	FALSE	Sometimes - it varies	Never (I have not experience this)	No patient safety incidents have occurred in my experience	Low Risk	FALSE
SPANISH	Doctor	Senior level medical or nursing or other clinical leader	FALSE	FALSE	TRUE	FALSE	FALSE	FALSE	FALSE		Colombia	TRUE	TRUE	FALSE	FALSE	FALSE	5	FALSE																												FALSE
SPANISH	Nurse	Other	TRUE	FALSE	FALSE	FALSE	FALSE	FALSE	FALSE		Colombia	TRUE	TRUE	FALSE	FALSE	FALSE	5	TRUE	4	FALSE	FALSE	FALSE	TRUE	FALSE	TRUE	FALSE	FALSE	FALSE	FALSE	TRUE	FALSE	FALSE	FALSE	FALSE	FALSE	FALSE	TRUE	FALSE	FALSE	FALSE	FALSE	Both - in a separate space initially, then afterwards with them	Sometimes (more than once a month)	Low harm - little harm was caused to the patients	Low Risk	TRUE	5	FALSE	FALSE
SPANISH	Nurse	Other	TRUE	TRUE	TRUE	FALSE	FALSE	FALSE	FALSE		Colombia	FALSE	TRUE	FALSE	FALSE	FALSE	10	TRUE	5	FALSE	TRUE	FALSE	TRUE	FALSE	FALSE	FALSE	FALSE	FALSE	FALSE	FALSE	FALSE	FALSE	FALSE	FALSE	TRUE	TRUE	TRUE	FALSE	FALSE	FALSE	FALSE	Yes - always with them	Occasionally (more than once a year)	Moderate harm - the patients were harmed, but not severely	Moderate Risk	TRUE	4	FALSE	TRUE
SPANISH	Nurse	Other	TRUE	FALSE	FALSE	FALSE	FALSE	FALSE	FALSE		Colombia	FALSE	TRUE	FALSE	FALSE	FALSE	15	TRUE	3	FALSE	FALSE	FALSE	TRUE	FALSE	FALSE	FALSE	FALSE	FALSE	FALSE	TRUE	FALSE	FALSE	FALSE	FALSE	FALSE	FALSE	FALSE	FALSE	FALSE	FALSE	FALSE	Both - in a separate space initially, then afterwards with them	Sometimes (more than once a month)	Moderate harm - the patients were harmed, but not severely	Moderate Risk	FALSE
SPANISH	Nurse	Other	FALSE	FALSE	FALSE	FALSE	FALSE	FALSE	FALSE	Otro	Colombia	FALSE	FALSE	FALSE	FALSE	TRUE	1	TRUE	4	FALSE	FALSE	FALSE	TRUE	FALSE	FALSE	FALSE	FALSE	FALSE	FALSE	FALSE	FALSE	FALSE	FALSE	FALSE	FALSE	FALSE	FALSE	FALSE	FALSE	FALSE	FALSE	Yes - always with them	Rarely (less than once a year)	No harm came to the patients	Low Risk	FALSE
SPANISH	Nurse	Other	TRUE	FALSE	FALSE	FALSE	FALSE	FALSE	FALSE		Colombia	FALSE	FALSE	FALSE	TRUE	FALSE	15	TRUE	4	TRUE	FALSE	FALSE	FALSE	FALSE	FALSE	FALSE	FALSE	FALSE	FALSE	TRUE	FALSE	FALSE	FALSE	FALSE	FALSE	FALSE	FALSE	FALSE	FALSE	FALSE	FALSE	Yes - always with them	Sometimes (more than once a month)	No harm came to the patients	No Risk At All	FALSE
SPANISH	Nurse	Other	FALSE	TRUE	FALSE	FALSE	FALSE	FALSE	FALSE		Colombia	TRUE	FALSE	FALSE	FALSE	FALSE	15	TRUE	4	TRUE	FALSE	FALSE	TRUE	TRUE	FALSE	FALSE	FALSE	FALSE	TRUE	FALSE	TRUE	TRUE	FALSE	FALSE	FALSE	FALSE	FALSE	FALSE	FALSE	FALSE	FALSE	Both - in a separate space initially, then afterwards with them	Sometimes (more than once a month)	Severe harm - they have caused serious incidents	Moderate Risk	TRUE	3	FALSE	TRUE
SPANISH	Nurse	Other	FALSE	FALSE	FALSE	FALSE	FALSE	FALSE	FALSE	Otro	Colombia	FALSE	TRUE	FALSE	FALSE	FALSE	15	FALSE																												FALSE
SPANISH	Nurse	Other	TRUE	FALSE	FALSE	FALSE	FALSE	FALSE	FALSE		Colombia	TRUE	FALSE	FALSE	FALSE	FALSE	1	TRUE	2	TRUE	FALSE	FALSE	FALSE	FALSE	FALSE	FALSE	FALSE	FALSE	TRUE	FALSE	FALSE	FALSE	FALSE	FALSE	FALSE	FALSE	FALSE	FALSE	FALSE	FALSE	FALSE	Both - in a separate space initially, then afterwards with them	Occasionally (more than once a year)	Low harm - little harm was caused to the patients	Moderate Risk	TRUE	4	TRUE	FALSE
SPANISH	Other	Other	FALSE	FALSE	FALSE	FALSE	FALSE	FALSE	FALSE	Otro	Colombia	FALSE	FALSE	FALSE	FALSE	TRUE	5	TRUE	5	FALSE	TRUE	FALSE	FALSE	FALSE	FALSE	FALSE	FALSE	FALSE	FALSE	TRUE	FALSE	FALSE	FALSE	FALSE	FALSE	FALSE	FALSE	FALSE	FALSE	FALSE	FALSE	Both - in a separate space initially, then afterwards with them	Never (I have not experience this)	No patient safety incidents have occurred in my experience	No Risk At All	FALSE
SPANISH	Nurse	Other	FALSE	FALSE	FALSE	FALSE	FALSE	FALSE	FALSE	Otro	Colombia	FALSE	TRUE	FALSE	FALSE	FALSE	1	TRUE	5	FALSE	FALSE	TRUE	FALSE	FALSE	FALSE	FALSE	FALSE	FALSE	FALSE	FALSE	FALSE	FALSE	FALSE	FALSE	FALSE	FALSE	TRUE	FALSE	FALSE	FALSE	FALSE	No - always in a separate place	Occasionally (more than once a year)	No patient safety incidents have occurred in my experience	No Risk At All	FALSE
SPANISH	Nurse	Other	FALSE	FALSE	FALSE	FALSE	FALSE	FALSE	FALSE	Otro	Colombia	FALSE	TRUE	FALSE	FALSE	FALSE	5	FALSE																												TRUE	3	FALSE	FALSE
SPANISH	Nurse	Other	FALSE	FALSE	FALSE	FALSE	FALSE	FALSE	FALSE	Otro	Colombia	TRUE	TRUE	FALSE	FALSE	FALSE	5	TRUE	3	FALSE	FALSE	FALSE	TRUE	FALSE	FALSE	FALSE	FALSE	FALSE	TRUE	FALSE	FALSE	FALSE	FALSE	FALSE	FALSE	FALSE	TRUE	FALSE	FALSE	FALSE	FALSE	Sometimes - it varies	Occasionally (more than once a year)	No harm came to the patients	Low Risk	FALSE
SPANISH	Nurse	Other	FALSE	FALSE	FALSE	FALSE	FALSE	FALSE	FALSE	Otro	Colombia	FALSE	FALSE	FALSE	FALSE	TRUE	5	TRUE	4	FALSE	FALSE	FALSE	FALSE	FALSE	FALSE	FALSE	FALSE	TRUE	TRUE	FALSE	FALSE	FALSE	FALSE	FALSE	TRUE	FALSE	FALSE	FALSE	FALSE	FALSE	FALSE	Yes - always with them	Rarely (less than once a year)	I don't know the outcome	Low Risk	TRUE	4	FALSE	FALSE
SPANISH	Nurse	Other	FALSE	FALSE	FALSE	FALSE	FALSE	FALSE	FALSE	Otro	Colombia	FALSE	TRUE	FALSE	FALSE	FALSE	15	TRUE	3	FALSE	FALSE	FALSE	TRUE	FALSE	FALSE	FALSE	FALSE	FALSE	FALSE	FALSE	FALSE	FALSE	FALSE	FALSE	TRUE	FALSE	FALSE	FALSE	FALSE	FALSE	FALSE	Yes - always with them	Rarely (less than once a year)	No harm came to the patients	I don't know	TRUE	4	FALSE	FALSE
SPANISH	Nurse	Other	TRUE	FALSE	FALSE	FALSE	FALSE	FALSE	FALSE		Colombia	TRUE	TRUE	FALSE	FALSE	FALSE	1	TRUE	4	FALSE	FALSE	FALSE	TRUE	FALSE	FALSE	FALSE	FALSE	FALSE	TRUE	FALSE	FALSE	TRUE	FALSE	FALSE	FALSE	FALSE	TRUE	FALSE	TRUE	FALSE	FALSE	Sometimes - it varies	Occasionally (more than once a year)	Low harm - little harm was caused to the patients	Moderate Risk	FALSE
SPANISH	Nurse	Other	FALSE	FALSE	FALSE	FALSE	FALSE	FALSE	FALSE	Otro	Colombia	TRUE	TRUE	FALSE	FALSE	TRUE	15	TRUE	5	TRUE	FALSE	TRUE	TRUE	FALSE	FALSE	FALSE	FALSE	FALSE	FALSE	TRUE	TRUE	FALSE	TRUE	FALSE	FALSE	FALSE	TRUE	FALSE	TRUE	FALSE	FALSE	Yes - always with them	Never (I have not experience this)	No patient safety incidents have occurred in my experience	No Risk At All	FALSE
SPANISH	Nurse	Other	FALSE	FALSE	FALSE	FALSE	FALSE	FALSE	FALSE	Otro	Colombia	FALSE	FALSE	FALSE	FALSE	TRUE	0	FALSE																												FALSE
SPANISH	Nurse	Other	TRUE	FALSE	FALSE	FALSE	FALSE	FALSE	FALSE		Colombia	TRUE	TRUE	FALSE	FALSE	FALSE	1	FALSE																												FALSE
SPANISH	Nurse	Other	TRUE	FALSE	FALSE	FALSE	FALSE	FALSE	FALSE		Colombia	FALSE	TRUE	FALSE	FALSE	FALSE	1	TRUE	4	FALSE	FALSE	TRUE	TRUE	FALSE	TRUE	FALSE	FALSE	FALSE	FALSE	TRUE	FALSE	FALSE	TRUE	FALSE	FALSE	FALSE	FALSE	FALSE	FALSE	FALSE	FALSE	Both - in a separate space initially, then afterwards with them	Rarely (less than once a year)	Low harm - little harm was caused to the patients	Low Risk	TRUE	4	FALSE	FALSE
SPANISH	Doctor	Middle grade clinician, middle manager or ward level leader	FALSE	TRUE	FALSE	FALSE	FALSE	FALSE	FALSE		Colombia	FALSE	FALSE	FALSE	FALSE	TRUE	15	TRUE	4	FALSE	FALSE	FALSE	FALSE	FALSE	TRUE	FALSE	FALSE	FALSE	FALSE	FALSE	FALSE	FALSE	FALSE	FALSE	FALSE	FALSE	TRUE	FALSE	FALSE	FALSE	FALSE	Yes - always with them	Occasionally (more than once a year)	Low harm - little harm was caused to the patients	Low Risk	TRUE	4	FALSE	FALSE
SPANISH	Doctor	Middle grade clinician, middle manager or ward level leader	FALSE	TRUE	FALSE	FALSE	FALSE	FALSE	FALSE		Colombia	FALSE	TRUE	FALSE	FALSE	FALSE	1	TRUE	5	FALSE	FALSE	TRUE	FALSE	FALSE	FALSE	FALSE	FALSE	FALSE	FALSE	FALSE	FALSE	FALSE	FALSE	TRUE	TRUE	FALSE	FALSE	FALSE	FALSE	FALSE	TRUE	Both - in a separate space initially, then afterwards with them	Rarely (less than once a year)	No harm came to the patients	Moderate Risk	TRUE	5	FALSE	FALSE
SPANISH	Doctor	Middle grade clinician, middle manager or ward level leader	FALSE	TRUE	FALSE	FALSE	FALSE	FALSE	FALSE		Colombia	FALSE	TRUE	FALSE	FALSE	FALSE	1	TRUE	4	TRUE	FALSE	TRUE	TRUE	FALSE	FALSE	FALSE	FALSE	FALSE	FALSE	FALSE	FALSE	FALSE	TRUE	FALSE	FALSE	FALSE	TRUE	FALSE	TRUE	FALSE	FALSE	Both - in a separate space initially, then afterwards with them	Sometimes (more than once a month)	Low harm - little harm was caused to the patients	Moderate Risk	TRUE	4	TRUE	FALSE
SPANISH	Doctor	Middle grade clinician, middle manager or ward level leader	TRUE	FALSE	FALSE	FALSE	FALSE	FALSE	FALSE		Colombia	FALSE	TRUE	FALSE	FALSE	FALSE	5	TRUE	4	FALSE	FALSE	FALSE	TRUE	FALSE	FALSE	FALSE	FALSE	FALSE	TRUE	FALSE	FALSE	FALSE	FALSE	FALSE	FALSE	TRUE	FALSE	FALSE	TRUE	TRUE	FALSE	Sometimes - it varies	Sometimes (more than once a month)	Moderate harm - the patients were harmed, but not severely	High Risk	TRUE	4	FALSE	FALSE
SPANISH	Nurse	Other	TRUE	FALSE	FALSE	FALSE	FALSE	FALSE	FALSE		Colombia	TRUE	FALSE	FALSE	FALSE	FALSE	0	TRUE	5	FALSE	FALSE	FALSE	FALSE	FALSE	TRUE	FALSE	FALSE	FALSE	TRUE	FALSE	FALSE	FALSE	FALSE	FALSE	FALSE	FALSE	TRUE	FALSE	FALSE	FALSE	FALSE	No - always in a separate place	Rarely (less than once a year)	No patient safety incidents have occurred in my experience	Low Risk	FALSE
SPANISH	Nurse	Other	FALSE	FALSE	TRUE	FALSE	FALSE	FALSE	FALSE		Colombia	FALSE	TRUE	FALSE	FALSE	FALSE	15	FALSE																												TRUE	5	TRUE	FALSE
SPANISH	Nurse	Other	TRUE	FALSE	FALSE	FALSE	FALSE	FALSE	FALSE		Colombia	FALSE	TRUE	FALSE	FALSE	FALSE	1	FALSE																												FALSE
SPANISH	Nurse	Other	TRUE	FALSE	FALSE	FALSE	FALSE	FALSE	FALSE		Colombia	TRUE	FALSE	FALSE	FALSE	FALSE	10	TRUE	5	TRUE	FALSE	FALSE	FALSE	FALSE	FALSE	FALSE	FALSE	FALSE	FALSE	FALSE	FALSE	FALSE	FALSE	FALSE	FALSE	FALSE	FALSE	FALSE	TRUE	FALSE	FALSE	Other	Never (I have not experience this)	No patient safety incidents have occurred in my experience	Low Risk	FALSE
SPANISH	Nurse	Other	FALSE	FALSE	FALSE	FALSE	FALSE	FALSE	FALSE	Otro	Colombia	TRUE	TRUE	FALSE	FALSE	FALSE	1	TRUE	4	FALSE	FALSE	FALSE	FALSE	FALSE	TRUE	FALSE	FALSE	FALSE	FALSE	FALSE	FALSE	TRUE	FALSE	FALSE	FALSE	FALSE	TRUE	FALSE	FALSE	FALSE	FALSE	Never - we use online or phone-based systems	Sometimes (more than once a month)	No harm came to the patients	Low Risk	FALSE
SPANISH	Nurse	Other	FALSE	TRUE	FALSE	FALSE	FALSE	FALSE	FALSE		Colombia	FALSE	TRUE	FALSE	FALSE	FALSE	10	TRUE	3	TRUE	FALSE	FALSE	FALSE	FALSE	FALSE	FALSE	FALSE	FALSE	FALSE	FALSE	FALSE	FALSE	FALSE	FALSE	FALSE	FALSE	FALSE	FALSE	TRUE	FALSE	FALSE	Yes - always with them	Rarely (less than once a year)	Low harm - little harm was caused to the patients	Moderate Risk	FALSE
SPANISH	Nurse	Other	FALSE	FALSE	FALSE	FALSE	FALSE	FALSE	FALSE	Otro	Colombia	FALSE	FALSE	FALSE	FALSE	TRUE	5	FALSE																												FALSE
[truncated: 72 more columns]
