# Supplementary material for: Safety of Handover: A Global Online Survey of Clinical Practitioners and Leaders Regarding Patient Safety during Transitions of Care
Source: Preprints.org preprint supplement (doi:10.20944/preprints202205.0202.v1), 2022-05-16
Supplement: Supplementary file 2 [file supplementary]

# Safety of Handover Questionnaire

## Section 1 — About you

1

**How would you describe your main clinical role?**

Nurse  
Doctor  
Administrator or manager  
Midwife  
Other allied health professional  
Pharmacist  
I don't work in a clinical environment  
Paramedic or ambulance worker  
Therapist  
Prefer not to answer  
Other

2

**How would you describe the level of your main clinical role?**

Senior level medical or nursing or other clinical leader  
Junior clinician, junior manager or junior ward staff  
Middle grade clinician, middle manager or ward level leader  
Senior manager or leader (e.g. CEO, COO)  
Prefer not to answer  
Other

3

**In what areas do you practice?**

Hospital based medical specialities  
General practice or family medicine  
Emergency or urgent care services  
Hospital based surgical specialities or OR  
Community or social care  
Mental health provision  
Prefer not to answer  
Other

4

**In which country do you primarily work?**

*[List of countries]*

5

**In which healthcare sectors do you work?**

- Private or independent healthcare
- Government funded services
- Prefer not to answer
- Other
- Charitable or NGO

6

**How many years, in total, have you worked in healthcare?**

- More than 15 years
- 10 - 14 years
- 5 - 9 years
- 1 - 4 years
- Less than 1 year
- I don't work in healthcare
- Prefer not to answer

**Section 2 — Peer-to-peer handover**

7a

**Are you personally involved in peer-to-peer handover?**

- Yes
- No

7b

**Overall, how well performed is the peer-to-peer handover in your organisation?**

- 1
- 2
- 3
- 4
- 5

### 7c

#### **In your opinion, what would improve peer-to-peer handover in your organisation?**

- More dedicated time to complete peer-to-peer handover tasks
- Improved communication systems
- Training for staff members
- Improved electronic information systems
- More physical space to allow for face-to-face discussions
- Training for clinical leaders
- I don't know
- Prefer not to answer
- Other

### 7d

#### **What systems are used for peer-to-peer handover in your organisation?**

- Electronic patient record systems (EPR/EHR/PAS)
- Face-to-face discussions
- Hand-written notes or paper-based systems
- Telephone calls
- Emails
- Office documents (Word, Excel or similar)
- Other specific electronic handover systems
- Electronic whiteboards or displays
- Unofficial messaging apps (e.g. WhatsApp, Signal)
- Authorised clinical messaging apps (e.g. Hospify, Siilo)
- Manual whiteboards or noticeboards
- Taped or recorded handover messages
- I don't know
- Prefer not to answer
- We don't use any systems for peer-to-peer handover
- Other

### 7e

#### **Does your peer-to-peer handover currently take place in the presence of the patient or service-user?**

- Yes - always with them
- No - always in a separate place
- Both - in a separate space initially, then afterwards with them
- Sometimes - it varies
- I don't know
- Prefer not to answer
- Never - we use online or phone-based systems

7f

**How often do safety incidents or near misses occur during the peer-to-peer handovers in your organisation due to errors, omissions or problems?**

- Rarely (less than once a year)
- Occasionally (more than once a year)
- Sometimes (more than once a month)
- Never (I have not experience this)
- Often (more than once a week)
- Very often (every day)
- I don't know
- Prefer not to answer
- Other

7g

**If safety incidents have occurred as a result of your peer-to-peer handover, what has been the worst outcome in your experience ?**

- Low harm - little harm was caused to the patients
- No patient safety incidents have occurred in my experience
- No harm came to the patients
- Moderate harm - the patients were harmed, but not severely
- Severe harm - they have caused Serious Incidents
- I don't know the outcome
- Prefer not to answer

7h

**In your opinion, what level of safety risk exists during the peer-to-peer handovers in your organisation?**

- Low risk
- Moderate risk
- High risk
- I don't know
- No risk at all
- Very high risk
- Prefer not to answer

### Section 3 — Internal referrals

8a

**Are you personally involved in internal referrals?**

- Yes
- No

## 8b

**Overall, how well performed are internal referrals in your organisation?**

- 1
- 2
- 3
- 4
- 5

## 8c

**In your opinion, what would improve internal referrals in your organisation?**

- Improved communication systems 54.8%
- Improved electronic information systems
- More dedicated time to complete internal referral tasks
- Training for staff members
- More physical space to allow for face-to-face discussions
- Training for clinical leaders
- I don't know
- Prefer not to answer
- Other

## 8d

**What systems are used for internal referrals in your organisation?**

- Electronic patient record system (EPR/EHR/PAS)
- Telephone calls
- Face-to-face discussions
- Hand-written notes or paper-based systems
- Emails
- Other specific electronic handover systems
- Office documents (Word, Excel or similar)
- Authorised clinical messaging apps (e.g. Hospify, Siilo)
- Unofficial messaging apps (e.g. WhatsApp, Signal)
- Electronic whiteboards or displays
- Manual whiteboards or noticeboards
- Taped or recorded handover messages
- Prefer not to answer
- I don't know
- We don't use any systems for internal referrals
- Other

8e

**How often do safety incidents or near misses occur during internal referrals in your organisation due to errors, omissions or problems?**

- Rarely (less than once a year)
- Occasionally (more than once a year)
- Sometimes (more than once a month)
- Never (I have not experience this)
- I don't know
- Very often (every day)
- Often (more than once a week)
- Prefer not to answer
- Other

8f

**If safety incidents have occurred in your organisation as a result of internal referrals, what has been the worst outcome in your experience?**

- Low harm - little harm was caused to the patients
- No harm came to the patients
- Moderate harm - the patients were harmed, but not severely
- No patient safety incidents have occurred in my experience
- I don't know the outcome
- Severe harm - they have caused serious incidents
- Prefer not to answer

8g

**In your opinion, what is the level of safety risk in your internal referrals ?**

- Low Risk
- Moderate Risk
- High Risk
- No Risk At All
- I don't know
- Prefer not to answer
- Very high risk

## Section 4 —Discharges and transfers between organisations

9a

**Are you personally involved in discharges and transfers between organisations?**

- Yes
- No

9b

**In your organisation, how well performed are discharges and transfers between organisations overall?**

- 1
- 2
- 3
- 4
- 5

9c

**In your opinion, what would improve discharges and transfers in your organisation?**

- Improved communication systems
- More dedicated time to complete discharge and referral tasks
- Improved electronic information systems
- Training for staff members
- Training for clinical leaders
- More physical space to allow for face-to-face discussions
- Prefer not to answer
- I don't know
- Other

9d

**What systems are used for these discharges and transfers between organisations?**

- Electronic patient record systems (EPR/EHR/PAS)
- Handwritten notes or paper-based systems
- Telephone calls
- Face-to-face discussions
- Other specific electronic handover systems
- Emails
- Office documents (Word, Excel or similar)
- Authorised clinical messaging apps (e.g. Hospify, Siilo)
- Electronic whiteboards or displays
- Unofficial messaging apps (e.g. WhatsApp, Signal)
- Taped or recorded handover messages
- Manual whiteboards or noticeboards
- Prefer not to answer
- I don't know
- We don't use any systems for discharges transfers
- Other

9e

**How often do safety incidents or near misses occur in your organisation due to errors, omissions or problems with discharges and transfers between organisations?**

- Rarely (less than once a year)
- Occasionally (more than once a year)
- Never (I have not experience this)
- Sometimes (more than once a month)
- Often (more than once a week)
- I don't know
- Very often (every day)
- Prefer not to answer
- Other

9f

**If safety incidents have occurred in your organisation as a result of discharges and transfers between organisations, what has been the worst outcome in your experience?**

- Low harm - little harm was caused to the patients
- No harm came to the patients
- Moderate harm - the patients were harmed, but not severely
- No patient safety incidents have occurred in my experience
- I don't know the outcome
- Severe harm - they have caused serious Incidents
- Prefer not to answer

9g

**In you opinion, what is the level of safety risk in your organisation with regard to discharges and transfers between organisations?**

- Low risk
- Moderate risk
- High risk
- No risk at all
- Prefer not to answer
- I don't know



## Section 5. — Leading and improving handover

10a

**Are you in a leadership position which makes you responsible for the quality of handover?**

Yes

No

10b

**Overall, how well performed are the handover processes in your remit as a leader?**

1

2

3

4

5

10c

**Have you personally tried to improve the quality of the handover processes in your organisation?**

Yes

No

10d

**How successful have your efforts been to improve handover processes?**

1 Very Poor

2

3

4

5

6

7 Excellent

10e

**What would make it easier for you to improve handover processes in your organisation?**

- Better electronic systems
- Training and simulation for staff
- Better motivation among staff
- Improved knowledge among staff
- Better access to patient information
- More leadership commitment
- Better physical layout of clinical areas
- More of my own management time
- Prefer not to answer
- I don't know
- Other

10f

**Which of the below have you identified as measures of improvement in handover processes in your organisation?**

- Improvements in staff efficiency
- Improvements to patient outcomes
- Reduction in patient safety incidents
- Improvements in patient flow
- Prefer not to answer
- I have not measured improvements
- Other

## Section 6 —Final Questions

11

**Would you like to be involved in more detailed research into clinical handover and patient safety, or to receive the results of this survey?**

- Yes
- No

12

**If you would like to receive the results of this survey — or to be involved in further research — please provide your email address.**

[Validated email answer]

13

**Finally, we would be delighted if you could share any comments, stories or other information on the subject of clinical handover.**

[Open text answer]
